# Supplementary material for: Rational Design of Non-Noble Metal Single-Atom Catalysts in Lithium–Sulfur Batteries through First Principles Calculations
Source: MDPI journal article supplement (doi:10.3390/nano14080692), 2024-04-17
Supplement: s1 [file s1]

## Supplementary Materials

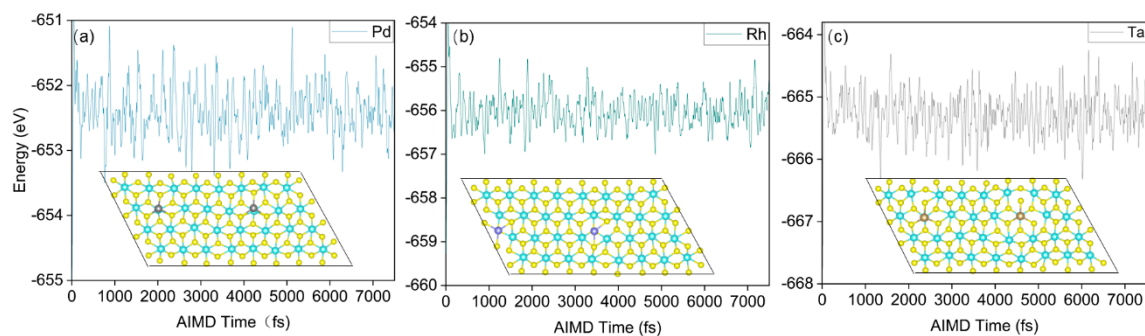

Figure S1 The final configurations of (a) Pd@VS<sub>2</sub>, (b) Rh@VS<sub>2</sub> and (c) Ta@VS<sub>2</sub>

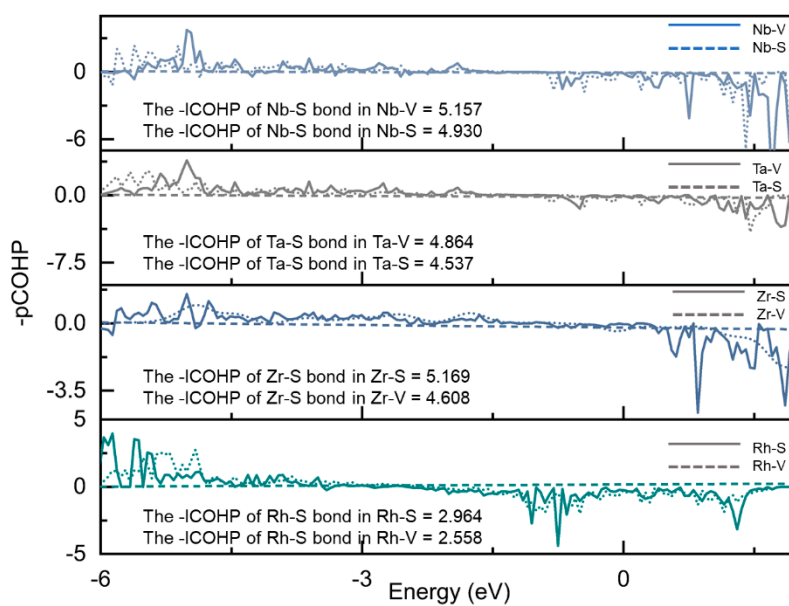

Figure S2 The ICOHP of TM-S bonds (TM@VS<sub>2</sub>, TM=Nb, Ta, Zr, Rh) for two kind of different site (H-V, H-S).

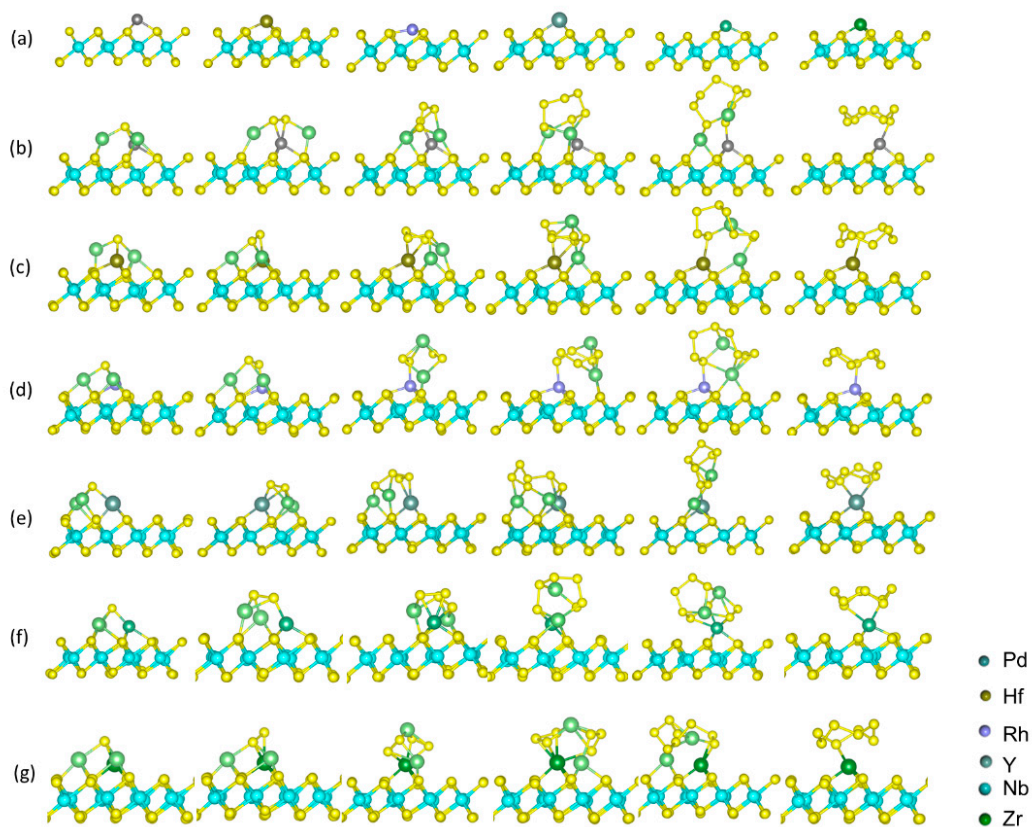

Figure S3 (a) The optimal configurations of TM@VS<sub>2</sub> (TM = Pd, Hf, Rh, Y, Nb, Zr). (b-g) Optimal configurations of Li<sub>2</sub>S<sub>n</sub> and S<sub>8</sub> on TM@VS<sub>2</sub> (TM = Pd, Hf, Rh, Y, Nb, Zr).

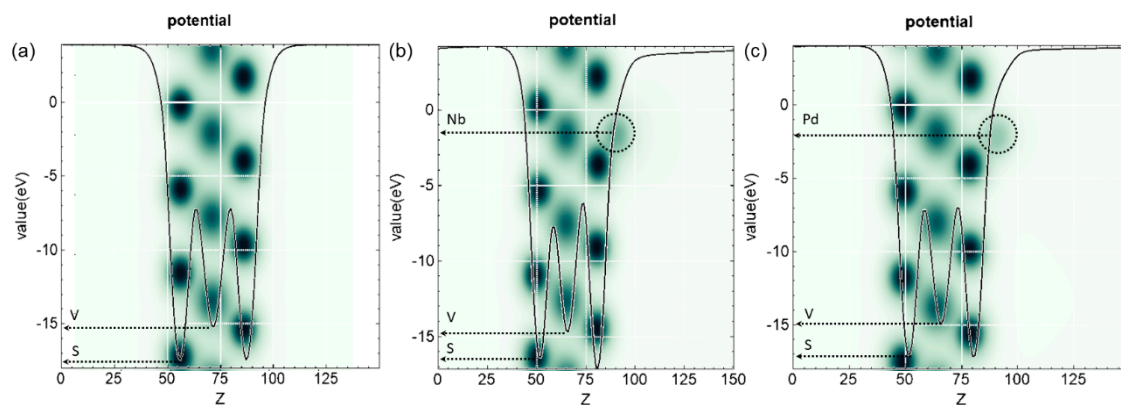

Figure S4 The electrostatics potential of (a) VS<sub>2</sub>, (b) Nb@VS<sub>2</sub>, (c) Pd@VS<sub>2</sub> by DS-PAW method, respectively.

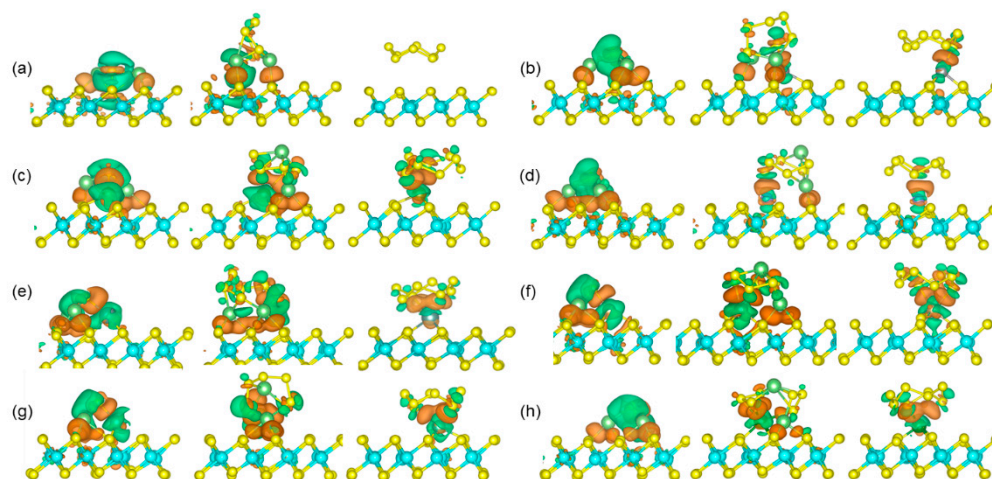

Figure S5 Differential charge density of  $\text{Li}_2\text{S}$ ,  $\text{Li}_2\text{S}_6$  and  $\text{S}_8$  on (a)  $\text{VS}_2$ , (b)  $\text{Pd@VS}_2$ , (c)  $\text{Hf@VS}_2$ , (d)  $\text{Rh@VS}_2$ , (e)  $\text{Y@VS}_2$ , (f)  $\text{Ta@VS}_2$ , (g)  $\text{Nb@VS}_2$  and (h)  $\text{Zr@VS}_2$ , the iso-surface is set to  $0.0025 \text{ e}/\text{\AA}^3$  (Orange region indicates electron concentration and green region indicates electron deficiency).

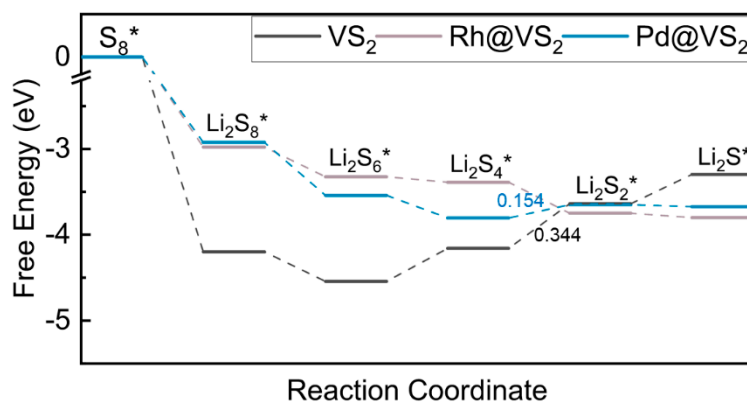

Figure S6 Gibbs Free Energy of  $\text{S}_8$ -to- $\text{Li}_2\text{S}$  reaction on  $\text{TM@VS}_2$  (TM = Rh, Pd).

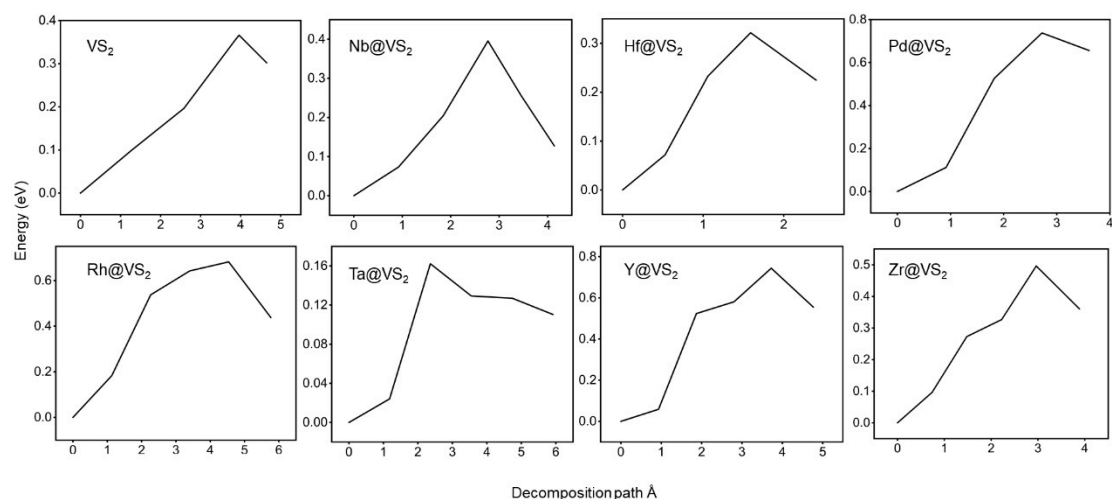

Figure S7 Decomposition energy Barriers of  $\text{Li}_2\text{S}$  on  $\text{TM@VS}_2$ .

Table S1 The adsorption energies of polysulfides on  $\text{TM@VS}_2$  (The units is electron volts (eV) )

|                         | Nb@VS <sub>2</sub> | Hf@VS <sub>2</sub> | Pd@VS <sub>2</sub> | Rh@VS <sub>2</sub> | Zr@VS <sub>2</sub> | Ta@VS <sub>2</sub> | Y@VS <sub>2</sub> |
|-------------------------|--------------------|--------------------|--------------------|--------------------|--------------------|--------------------|-------------------|
| $\text{Li}_2\text{S}$   | -5.876             | -6.002             | -4.423             | -4.276             | -5.728             | -5.795             | -4.774            |
| $\text{Li}_2\text{S}_2$ | -4.873             | -5.446             | -3.506             | -3.344             | -5.190             | -4.895             | -3.727            |
| $\text{Li}_2\text{S}_4$ | -4.098             | -4.722             | -2.888             | -2.246             | -3.966             | -4.395             | -3.130            |
| $\text{Li}_2\text{S}_6$ | -3.802             | -3.859             | -2.506             | -2.037             | -3.845             | -3.721             | -3.152            |
| $\text{Li}_2\text{S}_8$ | -3.752             | -3.668             | -2.197             | -2.005             | -3.675             | -2.519             | -2.376            |
| $\text{S}_8$            | -1.981             | -2.348             | -1.730             | -1.469             | -2.049             | -1.989             | -1.637            |

Table S2 The optimized coordinates of polysulfides on  $\text{TM@VS}_2$ .

| Nb@VS <sub>2</sub> |          |          |          |
|--------------------|----------|----------|----------|
|                    | 1        |          |          |
|                    | 12.884   | 0        | 0        |
|                    | -6.442   | 11.15787 | 0        |
|                    | 0        | 0        | 17.8775  |
|                    | V        | S        | Nb       |
|                    | 16       | 32       | 1        |
| Direct             |          |          |          |
|                    | 0.202506 | 0.200733 | 0.362485 |
|                    | 0.478078 | 0.224128 | 0.357515 |
|                    | 0.712947 | 0.221658 | 0.358734 |
|                    | 0.950177 | 0.224342 | 0.357518 |
|                    | 0.189189 | 0.434507 | 0.359072 |
|                    | 0.449384 | 0.434496 | 0.359041 |
|                    | 0.71287  | 0.461723 | 0.358722 |
|                    | 0.953109 | 0.462012 | 0.35869  |

|  |          |          |          |
|--|----------|----------|----------|
|  | 0.189043 | 0.72498  | 0.359098 |
|  | 0.459918 | 0.715284 | 0.361114 |
|  | 0.739869 | 0.724774 | 0.359211 |
|  | 0.950252 | 0.69658  | 0.357691 |
|  | 0.203049 | 0.972795 | 0.362605 |
|  | 0.44942  | 0.985254 | 0.359185 |
|  | 0.739929 | 0.98561  | 0.359146 |
|  | 0.974149 | 0.972076 | 0.362673 |
|  | 0.042322 | 0.132483 | 0.441543 |
|  | 0.126284 | 0.048317 | 0.274444 |
|  | 0.294453 | 0.132633 | 0.441722 |
|  | 0.374353 | 0.05419  | 0.275663 |
|  | 0.545514 | 0.137997 | 0.443568 |
|  | 0.623975 | 0.043857 | 0.286469 |
|  | 0.79682  | 0.138166 | 0.443645 |
|  | 0.884003 | 0.054225 | 0.27582  |
|  | 0.036616 | 0.378066 | 0.443541 |
|  | 0.120271 | 0.290436 | 0.275678 |
|  | 0.289406 | 0.374691 | 0.441485 |
|  | 0.374323 | 0.290475 | 0.27564  |
|  | 0.545523 | 0.37795  | 0.443506 |
|  | 0.63057  | 0.300572 | 0.273522 |
|  | 0.792913 | 0.381656 | 0.442948 |
|  | 0.874148 | 0.300663 | 0.273478 |
|  | 0.036583 | 0.629192 | 0.443695 |
|  | 0.130936 | 0.550758 | 0.286529 |
|  | 0.273354 | 0.621942 | 0.449263 |
|  | 0.374544 | 0.544987 | 0.289629 |
|  | 0.552669 | 0.621816 | 0.449228 |
|  | 0.623934 | 0.550687 | 0.286523 |
|  | 0.796708 | 0.629086 | 0.443729 |
|  | 0.874243 | 0.544305 | 0.273545 |
|  | 0.042489 | 0.880442 | 0.441689 |
|  | 0.120311 | 0.800393 | 0.275844 |
|  | 0.289416 | 0.885184 | 0.441569 |
|  | 0.374532 | 0.800011 | 0.289626 |
|  | 0.552734 | 0.901509 | 0.449014 |
|  | 0.629753 | 0.800148 | 0.289591 |
|  | 0.799897 | 0.885226 | 0.4415   |
|  | 0.884039 | 0.800272 | 0.27583  |
|  | 0.459686 | 0.715183 | 0.498776 |

|                    |          |          |          |
|--------------------|----------|----------|----------|
| Hf@VS <sub>2</sub> |          |          |          |
|                    | 1        |          |          |
|                    | 12.884   | 0        | 0        |
|                    | -6.442   | 11.15787 | 0        |
|                    | 0        | 0        | 17.8775  |
|                    | V        | S        | Hf       |
|                    | 16       | 32       | 1        |
| Direct             |          |          |          |
|                    | 0.202506 | 0.200733 | 0.362485 |
|                    | 0.478078 | 0.224128 | 0.357515 |
|                    | 0.712947 | 0.221658 | 0.358734 |
|                    | 0.950177 | 0.224342 | 0.357518 |
|                    | 0.189189 | 0.434507 | 0.359072 |
|                    | 0.449384 | 0.434496 | 0.359041 |
|                    | 0.71287  | 0.461723 | 0.358722 |
|                    | 0.953109 | 0.462012 | 0.35869  |
|                    | 0.189043 | 0.72498  | 0.359098 |
|                    | 0.459918 | 0.715284 | 0.361114 |
|                    | 0.739869 | 0.724774 | 0.359211 |
|                    | 0.950252 | 0.69658  | 0.357691 |
|                    | 0.203049 | 0.972795 | 0.362605 |
|                    | 0.44942  | 0.985254 | 0.359185 |
|                    | 0.739929 | 0.98561  | 0.359146 |
|                    | 0.974149 | 0.972076 | 0.362673 |
|                    | 0.042322 | 0.132483 | 0.441543 |
|                    | 0.126284 | 0.048317 | 0.274444 |
|                    | 0.294453 | 0.132633 | 0.441722 |
|                    | 0.374353 | 0.05419  | 0.275663 |
|                    | 0.545514 | 0.137997 | 0.443568 |
|                    | 0.623975 | 0.043857 | 0.286469 |
|                    | 0.79682  | 0.138166 | 0.443645 |
|                    | 0.884003 | 0.054225 | 0.27582  |
|                    | 0.036616 | 0.378066 | 0.443541 |
|                    | 0.120271 | 0.290436 | 0.275678 |
|                    | 0.289406 | 0.374691 | 0.441485 |
|                    | 0.374323 | 0.290475 | 0.27564  |
|                    | 0.545523 | 0.37795  | 0.443506 |
|                    | 0.63057  | 0.300572 | 0.273522 |
|                    | 0.792913 | 0.381656 | 0.442948 |
|                    | 0.874148 | 0.300663 | 0.273478 |
|                    | 0.036583 | 0.629192 | 0.443695 |
|                    | 0.130936 | 0.550758 | 0.286529 |
|                    | 0.273354 | 0.621942 | 0.449263 |

|  |          |          |          |
|--|----------|----------|----------|
|  | 0.374544 | 0.544987 | 0.289629 |
|  | 0.552669 | 0.621816 | 0.449228 |
|  | 0.623934 | 0.550687 | 0.286523 |
|  | 0.796708 | 0.629086 | 0.443729 |
|  | 0.874243 | 0.544305 | 0.273545 |
|  | 0.042489 | 0.880442 | 0.441689 |
|  | 0.120311 | 0.800393 | 0.275844 |
|  | 0.289416 | 0.885184 | 0.441569 |
|  | 0.374532 | 0.800011 | 0.289626 |
|  | 0.552734 | 0.901509 | 0.449014 |
|  | 0.629753 | 0.800148 | 0.289591 |
|  | 0.799897 | 0.885226 | 0.4415   |
|  | 0.884039 | 0.800272 | 0.27583  |
|  | 0.459686 | 0.715183 | 0.498776 |

|                    |          |          |          |
|--------------------|----------|----------|----------|
| Ta@VS <sub>2</sub> |          |          |          |
|                    | 1        |          |          |
|                    | 12.884   | 0        | 0        |
|                    | -6.442   | 11.15787 | 0        |
|                    | 0        | 0        | 17.8775  |
|                    | V        | S        | Ta       |
|                    | 16       | 32       | 1        |
| Direct             |          |          |          |
|                    | 0.201992 | 0.200306 | 0.362145 |
|                    | 0.47793  | 0.224166 | 0.35741  |
|                    | 0.713006 | 0.221605 | 0.358723 |
|                    | 0.950565 | 0.224291 | 0.357467 |
|                    | 0.187857 | 0.433329 | 0.359216 |
|                    | 0.449584 | 0.433263 | 0.359141 |
|                    | 0.712764 | 0.461863 | 0.358649 |
|                    | 0.953213 | 0.462021 | 0.35866  |
|                    | 0.187635 | 0.724739 | 0.359137 |
|                    | 0.459719 | 0.71507  | 0.359004 |
|                    | 0.741207 | 0.72476  | 0.359318 |
|                    | 0.950364 | 0.696781 | 0.357575 |
|                    | 0.202608 | 0.97291  | 0.362275 |
|                    | 0.449695 | 0.986824 | 0.35927  |
|                    | 0.741349 | 0.986992 | 0.35924  |
|                    | 0.97445  | 0.9722   | 0.362304 |
|                    | 0.042292 | 0.132413 | 0.441423 |
|                    | 0.126191 | 0.048255 | 0.274036 |
|                    | 0.294359 | 0.132622 | 0.441417 |
|                    | 0.374551 | 0.054626 | 0.275373 |
|                    | 0.545223 | 0.138296 | 0.44376  |
|                    | 0.62381  | 0.043376 | 0.28689  |
|                    | 0.797343 | 0.138363 | 0.443824 |
|                    | 0.884221 | 0.05461  | 0.275436 |
|                    | 0.036363 | 0.377517 | 0.443791 |
|                    | 0.119956 | 0.290386 | 0.275291 |
|                    | 0.289091 | 0.373992 | 0.441139 |
|                    | 0.37451  | 0.290372 | 0.275315 |
|                    | 0.54521  | 0.377436 | 0.443746 |
|                    | 0.630868 | 0.300742 | 0.273544 |
|                    | 0.792959 | 0.381776 | 0.442713 |
|                    | 0.874048 | 0.300762 | 0.273569 |
|                    | 0.036334 | 0.629453 | 0.443859 |
|                    | 0.131355 | 0.550908 | 0.286823 |
|                    | 0.272302 | 0.621369 | 0.450989 |

|  |          |          |          |
|--|----------|----------|----------|
|  | 0.374158 | 0.544105 | 0.289726 |
|  | 0.553259 | 0.621415 | 0.450929 |
|  | 0.623727 | 0.550916 | 0.286849 |
|  | 0.797168 | 0.629337 | 0.443906 |
|  | 0.874075 | 0.544022 | 0.273584 |
|  | 0.042436 | 0.880448 | 0.441467 |
|  | 0.119977 | 0.800119 | 0.275476 |
|  | 0.289122 | 0.885537 | 0.441114 |
|  | 0.374176 | 0.800429 | 0.289796 |
|  | 0.553257 | 0.902436 | 0.450981 |
|  | 0.630519 | 0.800568 | 0.289785 |
|  | 0.800574 | 0.885547 | 0.441194 |
|  | 0.884245 | 0.800136 | 0.275486 |
|  | 0.459591 | 0.715061 | 0.497987 |

|                   |          |          |          |
|-------------------|----------|----------|----------|
| Y@VS <sub>2</sub> |          |          |          |
|                   | 1        |          |          |
|                   | 12.884   | 0        | 0        |
|                   | -6.442   | 11.15787 | 0        |
|                   | 0        | 0        | 17.8775  |
|                   | V        | S        | Y        |
|                   | 16       | 32       | 1        |
| Direct            |          |          |          |
|                   | 0.192744 | 0.180995 | 0.363144 |
|                   | 0.471056 | 0.210336 | 0.360247 |
|                   | 0.710179 | 0.216396 | 0.361034 |
|                   | 0.943363 | 0.210448 | 0.360249 |
|                   | 0.177942 | 0.449431 | 0.356356 |
|                   | 0.475606 | 0.449508 | 0.356397 |
|                   | 0.715804 | 0.455434 | 0.360393 |
|                   | 0.943514 | 0.455239 | 0.360399 |
|                   | 0.191371 | 0.730646 | 0.363249 |
|                   | 0.475095 | 0.746364 | 0.356053 |
|                   | 0.743383 | 0.730504 | 0.363164 |
|                   | 0.960375 | 0.716338 | 0.358621 |
|                   | 0.206499 | 0.962724 | 0.358529 |
|                   | 0.470905 | 0.981949 | 0.360391 |
|                   | 0.715175 | 0.981856 | 0.360407 |
|                   | 0.960554 | 0.962866 | 0.358532 |
|                   | 0.036537 | 0.125069 | 0.441846 |
|                   | 0.123355 | 0.042431 | 0.272836 |
|                   | 0.292619 | 0.124901 | 0.441918 |
|                   | 0.38     | 0.050468 | 0.277447 |
|                   | 0.54574  | 0.133407 | 0.446727 |
|                   | 0.628559 | 0.052866 | 0.276617 |
|                   | 0.791748 | 0.133335 | 0.446699 |
|                   | 0.874702 | 0.050548 | 0.277494 |
|                   | 0.03423  | 0.377643 | 0.445043 |
|                   | 0.122803 | 0.291745 | 0.282939 |
|                   | 0.283843 | 0.36335  | 0.438616 |
|                   | 0.373075 | 0.291761 | 0.282869 |
|                   | 0.547529 | 0.377597 | 0.445009 |
|                   | 0.628648 | 0.296977 | 0.276428 |
|                   | 0.791733 | 0.37946  | 0.446864 |
|                   | 0.872379 | 0.29692  | 0.276363 |
|                   | 0.036374 | 0.63178  | 0.442816 |
|                   | 0.122647 | 0.551669 | 0.282583 |
|                   | 0.283718 | 0.640544 | 0.438601 |

|  |          |          |          |
|--|----------|----------|----------|
|  | 0.376214 | 0.548406 | 0.301308 |
|  | 0.561022 | 0.640631 | 0.438649 |
|  | 0.633182 | 0.551714 | 0.282526 |
|  | 0.799612 | 0.631836 | 0.442781 |
|  | 0.874578 | 0.544944 | 0.276938 |
|  | 0.042949 | 0.881568 | 0.439581 |
|  | 0.123081 | 0.800784 | 0.2728   |
|  | 0.292914 | 0.887475 | 0.441825 |
|  | 0.372973 | 0.802152 | 0.282959 |
|  | 0.547266 | 0.890355 | 0.444853 |
|  | 0.633206 | 0.802037 | 0.283037 |
|  | 0.798816 | 0.88736  | 0.441774 |
|  | 0.881932 | 0.800828 | 0.272792 |
|  | 0.376182 | 0.548115 | 0.512047 |

|                    |          |          |          |
|--------------------|----------|----------|----------|
| Zr@VS <sub>2</sub> |          |          |          |
|                    | 1        |          |          |
|                    | 12.884   | 0        | 0        |
|                    | -6.442   | 11.15787 | 0        |
|                    | 0        | 0        | 17.8775  |
|                    | V        | S        | Zr       |
|                    | 16       | 32       | 1        |
| Direct             |          |          |          |
|                    | 0.226444 | 0.214782 | 0.360956 |
|                    | 0.467757 | 0.212299 | 0.363306 |
|                    | 0.717586 | 0.231353 | 0.361589 |
|                    | 0.934422 | 0.188739 | 0.353562 |
|                    | 0.230174 | 0.449278 | 0.355613 |
|                    | 0.465473 | 0.457345 | 0.360765 |
|                    | 0.694679 | 0.451676 | 0.363375 |
|                    | 0.959102 | 0.488624 | 0.367395 |
|                    | 0.192286 | 0.722577 | 0.367752 |
|                    | 0.492409 | 0.742827 | 0.354205 |
|                    | 0.722486 | 0.704335 | 0.362863 |
|                    | 0.964412 | 0.71612  | 0.365546 |
|                    | 0.227584 | 0.983877 | 0.364044 |
|                    | 0.44635  | 0.958966 | 0.362102 |
|                    | 0.699767 | 0.980199 | 0.354226 |
|                    | 0.974723 | 0.958129 | 0.364307 |
|                    | 0.042837 | 0.132958 | 0.43525  |
|                    | 0.134268 | 0.04967  | 0.279139 |
|                    | 0.301184 | 0.136279 | 0.447906 |
|                    | 0.379009 | 0.048426 | 0.278387 |
|                    | 0.547688 | 0.131026 | 0.442483 |
|                    | 0.621784 | 0.055396 | 0.276198 |
|                    | 0.79062  | 0.129927 | 0.442204 |
|                    | 0.872019 | 0.043392 | 0.273801 |
|                    | 0.039714 | 0.36992  | 0.43994  |
|                    | 0.126971 | 0.292187 | 0.282329 |
|                    | 0.301724 | 0.379152 | 0.445259 |
|                    | 0.383535 | 0.296968 | 0.278293 |
|                    | 0.543267 | 0.378758 | 0.447403 |
|                    | 0.629452 | 0.29965  | 0.277548 |
|                    | 0.791333 | 0.38317  | 0.44781  |
|                    | 0.886266 | 0.311606 | 0.285444 |
|                    | 0.033218 | 0.646801 | 0.457101 |
|                    | 0.131028 | 0.549098 | 0.294997 |
|                    | 0.309875 | 0.639994 | 0.439565 |

|  |          |          |          |
|--|----------|----------|----------|
|  | 0.387197 | 0.553367 | 0.281647 |
|  | 0.549155 | 0.637536 | 0.43655  |
|  | 0.63065  | 0.546021 | 0.278076 |
|  | 0.789451 | 0.628426 | 0.446988 |
|  | 0.878205 | 0.553772 | 0.282986 |
|  | 0.050734 | 0.89035  | 0.44767  |
|  | 0.126636 | 0.802462 | 0.282764 |
|  | 0.295884 | 0.887816 | 0.449105 |
|  | 0.368111 | 0.791941 | 0.286403 |
|  | 0.549867 | 0.888432 | 0.442149 |
|  | 0.637574 | 0.807336 | 0.274107 |
|  | 0.795468 | 0.884342 | 0.429736 |
|  | 0.882584 | 0.799229 | 0.279363 |
|  | 0.131589 | 0.548581 | 0.504262 |

|                    |          |          |          |
|--------------------|----------|----------|----------|
| Pd@VS <sub>2</sub> |          |          |          |
|                    | 1        |          |          |
|                    | 12.884   | 0        | 0        |
|                    | -6.442   | 11.15787 | 0        |
|                    | 0        | 0        | 17.8775  |
|                    | V        | S        | Pd       |
|                    | 16       | 32       | 1        |
| Direct             |          |          |          |
|                    | 0.205426 | 0.206763 | 0.3609   |
|                    | 0.449561 | 0.210208 | 0.360114 |
|                    | 0.705173 | 0.205631 | 0.358894 |
|                    | 0.964673 | 0.210121 | 0.360108 |
|                    | 0.206986 | 0.449246 | 0.361238 |
|                    | 0.446263 | 0.449282 | 0.361254 |
|                    | 0.705247 | 0.470086 | 0.358794 |
|                    | 0.969235 | 0.469905 | 0.358831 |
|                    | 0.206968 | 0.72834  | 0.361237 |
|                    | 0.459529 | 0.714854 | 0.363346 |
|                    | 0.725529 | 0.728395 | 0.361219 |
|                    | 0.964613 | 0.725135 | 0.360116 |
|                    | 0.205333 | 0.969222 | 0.360829 |
|                    | 0.446289 | 0.967612 | 0.361155 |
|                    | 0.725426 | 0.967456 | 0.36122  |
|                    | 0.968082 | 0.96934  | 0.360873 |
|                    | 0.044198 | 0.130479 | 0.444904 |
|                    | 0.126316 | 0.048431 | 0.275191 |
|                    | 0.290386 | 0.130424 | 0.444895 |
|                    | 0.373013 | 0.048583 | 0.276704 |
|                    | 0.540964 | 0.133141 | 0.441955 |
|                    | 0.623269 | 0.042313 | 0.282379 |
|                    | 0.796347 | 0.133124 | 0.442128 |
|                    | 0.879668 | 0.048463 | 0.276742 |
|                    | 0.041538 | 0.378447 | 0.442107 |
|                    | 0.126237 | 0.295029 | 0.276719 |
|                    | 0.290275 | 0.376421 | 0.445191 |
|                    | 0.373065 | 0.295154 | 0.276685 |
|                    | 0.541078 | 0.378479 | 0.442047 |
|                    | 0.624634 | 0.29756  | 0.281983 |
|                    | 0.792949 | 0.381719 | 0.436327 |
|                    | 0.877091 | 0.297476 | 0.281897 |
|                    | 0.041431 | 0.633639 | 0.44203  |
|                    | 0.132418 | 0.551477 | 0.28234  |
|                    | 0.28087  | 0.625692 | 0.439901 |

|  |          |          |          |
|--|----------|----------|----------|
|  | 0.375779 | 0.547393 | 0.281808 |
|  | 0.54885  | 0.625631 | 0.439883 |
|  | 0.623261 | 0.551536 | 0.282382 |
|  | 0.796347 | 0.633735 | 0.442081 |
|  | 0.877171 | 0.549994 | 0.28182  |
|  | 0.04423  | 0.884244 | 0.444908 |
|  | 0.126087 | 0.801588 | 0.27672  |
|  | 0.290274 | 0.884355 | 0.445166 |
|  | 0.375672 | 0.798736 | 0.281856 |
|  | 0.548905 | 0.893604 | 0.439766 |
|  | 0.627131 | 0.798856 | 0.281875 |
|  | 0.798265 | 0.884371 | 0.445196 |
|  | 0.879604 | 0.801603 | 0.276698 |
|  | 0.459553 | 0.715178 | 0.508342 |

|                    |          |          |          |
|--------------------|----------|----------|----------|
| Rh@VS <sub>2</sub> |          |          |          |
|                    | 1        |          |          |
|                    | 12.884   | 0        | 0        |
|                    | -6.442   | 11.15787 | 0        |
|                    | 0        | 0        | 17.8775  |
|                    | V        | S        | Rh       |
|                    | 16       | 32       | 1        |
| Direct             |          |          |          |
|                    | 0.215975 | 0.208648 | 0.361938 |
|                    | 0.465927 | 0.216774 | 0.360883 |
|                    | 0.704209 | 0.208341 | 0.361686 |
|                    | 0.953127 | 0.205441 | 0.359844 |
|                    | 0.221295 | 0.45352  | 0.363407 |
|                    | 0.460996 | 0.451198 | 0.360684 |
|                    | 0.701013 | 0.454235 | 0.360834 |
|                    | 0.94414  | 0.455861 | 0.367068 |
|                    | 0.222466 | 0.73839  | 0.360695 |
|                    | 0.469645 | 0.71915  | 0.364431 |
|                    | 0.721787 | 0.740625 | 0.359412 |
|                    | 0.949861 | 0.711406 | 0.364534 |
|                    | 0.227294 | 0.980689 | 0.361817 |
|                    | 0.463907 | 0.978545 | 0.361418 |
|                    | 0.701814 | 0.971748 | 0.359338 |
|                    | 0.979852 | 0.970709 | 0.359885 |
|                    | 0.047535 | 0.130283 | 0.441172 |
|                    | 0.135554 | 0.05034  | 0.276174 |
|                    | 0.299412 | 0.134512 | 0.44624  |
|                    | 0.381919 | 0.052926 | 0.276127 |
|                    | 0.545705 | 0.134328 | 0.446152 |
|                    | 0.625312 | 0.051447 | 0.275539 |
|                    | 0.7908   | 0.129932 | 0.442968 |
|                    | 0.879278 | 0.050011 | 0.279837 |
|                    | 0.034149 | 0.35881  | 0.450403 |
|                    | 0.130034 | 0.298501 | 0.282638 |
|                    | 0.298435 | 0.377519 | 0.446744 |
|                    | 0.379767 | 0.296151 | 0.277908 |
|                    | 0.544542 | 0.379843 | 0.445683 |
|                    | 0.628131 | 0.297796 | 0.277879 |
|                    | 0.787627 | 0.377887 | 0.447286 |
|                    | 0.879292 | 0.3021   | 0.282963 |
|                    | 0.031963 | 0.644508 | 0.452216 |
|                    | 0.130643 | 0.550302 | 0.297053 |
|                    | 0.324028 | 0.64394  | 0.452219 |

|  |          |          |          |
|--|----------|----------|----------|
|  | 0.379563 | 0.547739 | 0.283413 |
|  | 0.553595 | 0.633902 | 0.438191 |
|  | 0.628913 | 0.550035 | 0.283855 |
|  | 0.787683 | 0.633876 | 0.439897 |
|  | 0.878401 | 0.54689  | 0.283474 |
|  | 0.05029  | 0.888082 | 0.441443 |
|  | 0.129744 | 0.800534 | 0.283616 |
|  | 0.299864 | 0.889728 | 0.446686 |
|  | 0.379005 | 0.800424 | 0.282609 |
|  | 0.548374 | 0.890229 | 0.442521 |
|  | 0.627935 | 0.803405 | 0.276744 |
|  | 0.799307 | 0.890996 | 0.440176 |
|  | 0.882458 | 0.80122  | 0.278014 |
|  | 0.13198  | 0.551646 | 0.468756 |

|                                      |          |          |          |    |
|--------------------------------------|----------|----------|----------|----|
| Li <sub>2</sub> S-Pd@VS <sub>2</sub> |          |          |          |    |
|                                      | 1        |          |          |    |
|                                      | 12.884   | 0        | 0        |    |
|                                      | -6.442   | 11.15787 | 0        |    |
|                                      | 0        | 0        | 17.8775  |    |
|                                      | V        | S        | Pd       | Li |
|                                      | 16       | 33       | 1        | 2  |
| Direct                               |          |          |          |    |
|                                      | 0.188269 | 0.214413 | 0.366229 |    |
|                                      | 0.46264  | 0.211651 | 0.363504 |    |
|                                      | 0.697669 | 0.196331 | 0.367376 |    |
|                                      | 0.949754 | 0.222796 | 0.365672 |    |
|                                      | 0.208198 | 0.458431 | 0.362084 |    |
|                                      | 0.431955 | 0.438976 | 0.359844 |    |
|                                      | 0.691911 | 0.480452 | 0.366787 |    |
|                                      | 0.977233 | 0.475268 | 0.366329 |    |
|                                      | 0.205208 | 0.735393 | 0.364571 |    |
|                                      | 0.437923 | 0.737271 | 0.363068 |    |
|                                      | 0.73599  | 0.741865 | 0.359564 |    |
|                                      | 0.962713 | 0.711641 | 0.362222 |    |
|                                      | 0.193436 | 0.982747 | 0.368236 |    |
|                                      | 0.438907 | 0.96937  | 0.36529  |    |
|                                      | 0.716228 | 0.96546  | 0.362494 |    |
|                                      | 0.961195 | 0.985821 | 0.366251 |    |
|                                      | 0.035009 | 0.139251 | 0.451379 |    |
|                                      | 0.117744 | 0.058352 | 0.280229 |    |
|                                      | 0.286043 | 0.140678 | 0.446192 |    |
|                                      | 0.365796 | 0.054575 | 0.282447 |    |
|                                      | 0.534908 | 0.133933 | 0.449586 |    |
|                                      | 0.617791 | 0.047882 | 0.283808 |    |
|                                      | 0.787073 | 0.132323 | 0.449351 |    |
|                                      | 0.87267  | 0.0585   | 0.281809 |    |
|                                      | 0.041453 | 0.387318 | 0.448882 |    |
|                                      | 0.115484 | 0.302006 | 0.28163  |    |
|                                      | 0.283607 | 0.381445 | 0.4489   |    |
|                                      | 0.362894 | 0.292227 | 0.279459 |    |
|                                      | 0.53339  | 0.383319 | 0.447012 |    |
|                                      | 0.622515 | 0.303895 | 0.28851  |    |
|                                      | 0.787566 | 0.386626 | 0.433342 |    |
|                                      | 0.867353 | 0.30486  | 0.287846 |    |
|                                      | 0.040309 | 0.638875 | 0.448143 |    |
|                                      | 0.126077 | 0.556354 | 0.282845 |    |
|                                      | 0.282643 | 0.637569 | 0.444235 |    |

|  |          |          |          |  |
|--|----------|----------|----------|--|
|  | 0.369557 | 0.55282  | 0.285365 |  |
|  | 0.535401 | 0.639703 | 0.41699  |  |
|  | 0.616406 | 0.557479 | 0.285345 |  |
|  | 0.79196  | 0.640503 | 0.446222 |  |
|  | 0.869766 | 0.551081 | 0.288232 |  |
|  | 0.034799 | 0.888391 | 0.445729 |  |
|  | 0.120604 | 0.809558 | 0.281932 |  |
|  | 0.282389 | 0.891523 | 0.448554 |  |
|  | 0.364026 | 0.81145  | 0.277329 |  |
|  | 0.537752 | 0.892393 | 0.444744 |  |
|  | 0.622474 | 0.80511  | 0.285183 |  |
|  | 0.793888 | 0.890005 | 0.448751 |  |
|  | 0.882755 | 0.811625 | 0.278924 |  |
|  | 0.542588 | 0.62777  | 0.604805 |  |
|  | 0.475293 | 0.702907 | 0.515459 |  |
|  | 0.725469 | 0.728547 | 0.543963 |  |
|  | 0.442178 | 0.444732 | 0.544516 |  |

|                                                    |          |          |          |    |
|----------------------------------------------------|----------|----------|----------|----|
| Li <sub>2</sub> S <sub>2</sub> -Pd@VS <sub>2</sub> |          |          |          |    |
|                                                    | 1        |          |          |    |
|                                                    | 12.884   | 0        | 0        |    |
|                                                    | -6.442   | 11.15787 | 0        |    |
|                                                    | 0        | 0        | 17.8775  |    |
|                                                    | V        | S        | Pd       | Li |
|                                                    | 16       | 34       | 1        | 2  |
| Direct                                             |          |          |          |    |
|                                                    | 0.194297 | 0.210137 | 0.366153 |    |
|                                                    | 0.471287 | 0.210842 | 0.362231 |    |
|                                                    | 0.704369 | 0.195517 | 0.364758 |    |
|                                                    | 0.955996 | 0.222474 | 0.364382 |    |
|                                                    | 0.212848 | 0.452919 | 0.359647 |    |
|                                                    | 0.440983 | 0.437583 | 0.359514 |    |
|                                                    | 0.698305 | 0.479628 | 0.367785 |    |
|                                                    | 0.983991 | 0.475762 | 0.364982 |    |
|                                                    | 0.207858 | 0.732468 | 0.361497 |    |
|                                                    | 0.437867 | 0.726622 | 0.360129 |    |
|                                                    | 0.740146 | 0.73731  | 0.358209 |    |
|                                                    | 0.967291 | 0.708867 | 0.360742 |    |
|                                                    | 0.199945 | 0.980167 | 0.365942 |    |
|                                                    | 0.441783 | 0.967485 | 0.36218  |    |
|                                                    | 0.728099 | 0.964985 | 0.357954 |    |
|                                                    | 0.967699 | 0.979366 | 0.364203 |    |
|                                                    | 0.039256 | 0.13423  | 0.44953  |    |
|                                                    | 0.123726 | 0.055934 | 0.278554 |    |
|                                                    | 0.291071 | 0.136275 | 0.445036 |    |
|                                                    | 0.371433 | 0.053907 | 0.280019 |    |
|                                                    | 0.540995 | 0.130785 | 0.448008 |    |
|                                                    | 0.623611 | 0.045524 | 0.282003 |    |
|                                                    | 0.792778 | 0.129036 | 0.446803 |    |
|                                                    | 0.881608 | 0.057868 | 0.278927 |    |
|                                                    | 0.047113 | 0.384721 | 0.447378 |    |
|                                                    | 0.121422 | 0.298095 | 0.279973 |    |
|                                                    | 0.291196 | 0.379132 | 0.447454 |    |
|                                                    | 0.369395 | 0.290182 | 0.279175 |    |
|                                                    | 0.538218 | 0.37988  | 0.446205 |    |
|                                                    | 0.628046 | 0.301816 | 0.286091 |    |
|                                                    | 0.793329 | 0.384412 | 0.432068 |    |
|                                                    | 0.874057 | 0.304582 | 0.286485 |    |
|                                                    | 0.044829 | 0.63709  | 0.447087 |    |
|                                                    | 0.131246 | 0.55302  | 0.280988 |    |
|                                                    | 0.282876 | 0.631509 | 0.44037  |    |

|  |          |          |          |  |
|--|----------|----------|----------|--|
|  | 0.374687 | 0.548086 | 0.282326 |  |
|  | 0.541544 | 0.636425 | 0.418462 |  |
|  | 0.62265  | 0.553575 | 0.284053 |  |
|  | 0.796276 | 0.640002 | 0.445351 |  |
|  | 0.873914 | 0.547403 | 0.286986 |  |
|  | 0.040047 | 0.885292 | 0.444238 |  |
|  | 0.124324 | 0.806082 | 0.279351 |  |
|  | 0.28746  | 0.887897 | 0.446491 |  |
|  | 0.368258 | 0.807593 | 0.275183 |  |
|  | 0.545483 | 0.89077  | 0.437788 |  |
|  | 0.627567 | 0.802227 | 0.283141 |  |
|  | 0.797363 | 0.885279 | 0.445917 |  |
|  | 0.886641 | 0.806984 | 0.276915 |  |
|  | 0.505546 | 0.641359 | 0.630264 |  |
|  | 0.416379 | 0.738029 | 0.634839 |  |
|  | 0.474193 | 0.702006 | 0.514596 |  |
|  | 0.550135 | 0.924825 | 0.568609 |  |
|  | 0.329843 | 0.481676 | 0.566553 |  |

|                                                    |          |          |          |    |
|----------------------------------------------------|----------|----------|----------|----|
| Li <sub>2</sub> S <sub>4</sub> -Pd@VS <sub>2</sub> |          |          |          |    |
|                                                    | 1        |          |          |    |
|                                                    | 12.884   | 0        | 0        |    |
|                                                    | -6.442   | 11.15787 | 0        |    |
|                                                    | 0        | 0        | 17.8775  |    |
|                                                    | V        | S        | Pd       | Li |
|                                                    | 16       | 36       | 1        | 2  |
| Direct                                             |          |          |          |    |
|                                                    | 0.203137 | 0.215921 | 0.368947 |    |
|                                                    | 0.467894 | 0.21197  | 0.364649 |    |
|                                                    | 0.715473 | 0.244626 | 0.370314 |    |
|                                                    | 0.943688 | 0.226361 | 0.369227 |    |
|                                                    | 0.211986 | 0.453131 | 0.365485 |    |
|                                                    | 0.440425 | 0.44673  | 0.365358 |    |
|                                                    | 0.698922 | 0.481129 | 0.365625 |    |
|                                                    | 0.980318 | 0.475562 | 0.361859 |    |
|                                                    | 0.213208 | 0.746797 | 0.370279 |    |
|                                                    | 0.444049 | 0.730115 | 0.369224 |    |
|                                                    | 0.739382 | 0.734684 | 0.362787 |    |
|                                                    | 0.96295  | 0.706375 | 0.362349 |    |
|                                                    | 0.191929 | 0.979966 | 0.369236 |    |
|                                                    | 0.47984  | 0.981997 | 0.36348  |    |
|                                                    | 0.714614 | 0.96062  | 0.363708 |    |
|                                                    | 0.962544 | 0.992833 | 0.368551 |    |
|                                                    | 0.040673 | 0.144641 | 0.451769 |    |
|                                                    | 0.122381 | 0.059798 | 0.282337 |    |
|                                                    | 0.293596 | 0.139912 | 0.44821  |    |
|                                                    | 0.377522 | 0.055792 | 0.287167 |    |
|                                                    | 0.546174 | 0.139364 | 0.45063  |    |
|                                                    | 0.631095 | 0.057808 | 0.28538  |    |
|                                                    | 0.789689 | 0.142074 | 0.447911 |    |
|                                                    | 0.876296 | 0.061962 | 0.283791 |    |
|                                                    | 0.045207 | 0.390634 | 0.449276 |    |
|                                                    | 0.122769 | 0.302546 | 0.285377 |    |
|                                                    | 0.291087 | 0.383544 | 0.453231 |    |
|                                                    | 0.372452 | 0.298681 | 0.283657 |    |
|                                                    | 0.540642 | 0.386276 | 0.448268 |    |
|                                                    | 0.627548 | 0.312608 | 0.284601 |    |
|                                                    | 0.79487  | 0.39659  | 0.44741  |    |
|                                                    | 0.872294 | 0.308599 | 0.283597 |    |
|                                                    | 0.044338 | 0.636607 | 0.448277 |    |
|                                                    | 0.133924 | 0.557623 | 0.286254 |    |
|                                                    | 0.283802 | 0.636981 | 0.445503 |    |

|  |          |          |          |  |
|--|----------|----------|----------|--|
|  | 0.375963 | 0.556879 | 0.28851  |  |
|  | 0.546595 | 0.640947 | 0.43399  |  |
|  | 0.620931 | 0.561542 | 0.287464 |  |
|  | 0.800844 | 0.642282 | 0.446331 |  |
|  | 0.876317 | 0.552998 | 0.28382  |  |
|  | 0.039103 | 0.889842 | 0.446421 |  |
|  | 0.12772  | 0.812863 | 0.283675 |  |
|  | 0.292642 | 0.896688 | 0.448507 |  |
|  | 0.373378 | 0.812273 | 0.28425  |  |
|  | 0.551905 | 0.899558 | 0.449917 |  |
|  | 0.625735 | 0.803729 | 0.287455 |  |
|  | 0.798251 | 0.891491 | 0.449427 |  |
|  | 0.886736 | 0.812258 | 0.282642 |  |
|  | 0.730955 | 0.623441 | 0.603328 |  |
|  | 0.691498 | 0.653837 | 0.710252 |  |
|  | 0.443571 | 0.629357 | 0.635717 |  |
|  | 0.596212 | 0.74231  | 0.696455 |  |
|  | 0.465969 | 0.718687 | 0.52079  |  |
|  | 0.703955 | 0.784788 | 0.564192 |  |
|  | 0.525224 | 0.517134 | 0.552756 |  |

|                                                    |          |          |          |    |
|----------------------------------------------------|----------|----------|----------|----|
| Li <sub>2</sub> S <sub>6</sub> -Pd@VS <sub>2</sub> |          |          |          |    |
|                                                    | 1        |          |          |    |
|                                                    | 12.884   | 0        | 0        |    |
|                                                    | -6.442   | 11.15787 | 0        |    |
|                                                    | 0        | 0        | 17.8775  |    |
|                                                    | V        | S        | Pd       | Li |
|                                                    | 16       | 38       | 1        | 2  |
| Direct                                             |          |          |          |    |
|                                                    | 0.198154 | 0.208609 | 0.376272 |    |
|                                                    | 0.465076 | 0.219222 | 0.371824 |    |
|                                                    | 0.695698 | 0.212126 | 0.37073  |    |
|                                                    | 0.936318 | 0.223755 | 0.369456 |    |
|                                                    | 0.189697 | 0.442466 | 0.37062  |    |
|                                                    | 0.440351 | 0.447213 | 0.367503 |    |
|                                                    | 0.698399 | 0.45424  | 0.372118 |    |
|                                                    | 0.966771 | 0.487487 | 0.370667 |    |
|                                                    | 0.208691 | 0.747004 | 0.368517 |    |
|                                                    | 0.465538 | 0.748802 | 0.370059 |    |
|                                                    | 0.719111 | 0.755215 | 0.368141 |    |
|                                                    | 0.938883 | 0.70702  | 0.375008 |    |
|                                                    | 0.222014 | 0.99024  | 0.372963 |    |
|                                                    | 0.451026 | 0.975268 | 0.372195 |    |
|                                                    | 0.705056 | 0.985223 | 0.370154 |    |
|                                                    | 0.971733 | 0.969997 | 0.375846 |    |
|                                                    | 0.036127 | 0.137256 | 0.453071 |    |
|                                                    | 0.124359 | 0.053843 | 0.289194 |    |
|                                                    | 0.29352  | 0.142    | 0.457045 |    |
|                                                    | 0.374483 | 0.057836 | 0.286976 |    |
|                                                    | 0.539133 | 0.140296 | 0.456507 |    |
|                                                    | 0.619195 | 0.056692 | 0.286839 |    |
|                                                    | 0.787054 | 0.144984 | 0.456177 |    |
|                                                    | 0.874154 | 0.059276 | 0.294079 |    |
|                                                    | 0.037401 | 0.390009 | 0.453576 |    |
|                                                    | 0.115122 | 0.295307 | 0.288661 |    |
|                                                    | 0.285692 | 0.383975 | 0.455702 |    |
|                                                    | 0.367421 | 0.297204 | 0.288267 |    |
|                                                    | 0.536833 | 0.385242 | 0.451683 |    |
|                                                    | 0.621149 | 0.30289  | 0.286444 |    |
|                                                    | 0.789633 | 0.389186 | 0.451562 |    |
|                                                    | 0.868128 | 0.309829 | 0.290405 |    |
|                                                    | 0.042488 | 0.644618 | 0.453652 |    |
|                                                    | 0.128048 | 0.559058 | 0.29432  |    |
|                                                    | 0.284341 | 0.636544 | 0.437152 |    |

|  |          |          |          |  |
|--|----------|----------|----------|--|
|  | 0.37215  | 0.556503 | 0.299998 |  |
|  | 0.548239 | 0.641747 | 0.443493 |  |
|  | 0.621012 | 0.56045  | 0.301854 |  |
|  | 0.784706 | 0.638238 | 0.452922 |  |
|  | 0.86903  | 0.554567 | 0.289827 |  |
|  | 0.043063 | 0.887704 | 0.45371  |  |
|  | 0.120837 | 0.811339 | 0.290762 |  |
|  | 0.290163 | 0.895065 | 0.456179 |  |
|  | 0.373219 | 0.812028 | 0.286777 |  |
|  | 0.544413 | 0.903779 | 0.455958 |  |
|  | 0.626408 | 0.815493 | 0.28547  |  |
|  | 0.793418 | 0.899852 | 0.454053 |  |
|  | 0.877527 | 0.807301 | 0.28991  |  |
|  | 0.529217 | 0.446604 | 0.605744 |  |
|  | 0.553173 | 0.445214 | 0.720035 |  |
|  | 0.610892 | 0.718109 | 0.774328 |  |
|  | 0.687078 | 0.612785 | 0.748852 |  |
|  | 0.400913 | 0.669819 | 0.643663 |  |
|  | 0.580569 | 0.779152 | 0.674775 |  |
|  | 0.446286 | 0.713016 | 0.518481 |  |
|  | 0.365102 | 0.476817 | 0.58306  |  |
|  | 0.647487 | 0.657957 | 0.572275 |  |

|                                                    |          |          |          |    |
|----------------------------------------------------|----------|----------|----------|----|
| Li <sub>2</sub> S <sub>8</sub> -Pd@VS <sub>2</sub> |          |          |          |    |
|                                                    | 1        |          |          |    |
|                                                    | 12.884   | 0        | 0        |    |
|                                                    | -6.442   | 11.15787 | 0        |    |
|                                                    | 0        | 0        | 17.8775  |    |
|                                                    | V        | S        | Pd       | Li |
|                                                    | 16       | 40       | 1        | 2  |
| Direct                                             |          |          |          |    |
|                                                    | 0.200676 | 0.21306  | 0.36609  |    |
|                                                    | 0.449622 | 0.206852 | 0.362127 |    |
|                                                    | 0.699243 | 0.198735 | 0.364494 |    |
|                                                    | 0.962585 | 0.227771 | 0.364863 |    |
|                                                    | 0.204508 | 0.457908 | 0.365828 |    |
|                                                    | 0.434288 | 0.450593 | 0.363826 |    |
|                                                    | 0.699023 | 0.484066 | 0.365385 |    |
|                                                    | 0.970068 | 0.469588 | 0.364973 |    |
|                                                    | 0.203871 | 0.726897 | 0.364583 |    |
|                                                    | 0.434642 | 0.712923 | 0.365604 |    |
|                                                    | 0.732808 | 0.739057 | 0.362144 |    |
|                                                    | 0.963536 | 0.710544 | 0.363721 |    |
|                                                    | 0.195879 | 0.971097 | 0.365542 |    |
|                                                    | 0.437477 | 0.960968 | 0.363873 |    |
|                                                    | 0.725851 | 0.970645 | 0.362661 |    |
|                                                    | 0.966653 | 0.984792 | 0.365471 |    |
|                                                    | 0.042118 | 0.138733 | 0.450083 |    |
|                                                    | 0.122766 | 0.054989 | 0.280138 |    |
|                                                    | 0.288189 | 0.133978 | 0.446747 |    |
|                                                    | 0.367849 | 0.050195 | 0.28029  |    |
|                                                    | 0.535547 | 0.13211  | 0.44526  |    |
|                                                    | 0.619603 | 0.044111 | 0.283765 |    |
|                                                    | 0.791132 | 0.134058 | 0.44678  |    |
|                                                    | 0.878075 | 0.05722  | 0.280563 |    |
|                                                    | 0.039353 | 0.383603 | 0.449984 |    |
|                                                    | 0.122603 | 0.301487 | 0.282049 |    |
|                                                    | 0.286034 | 0.381063 | 0.450978 |    |
|                                                    | 0.369787 | 0.298505 | 0.281121 |    |
|                                                    | 0.535989 | 0.382338 | 0.444242 |    |
|                                                    | 0.623574 | 0.302754 | 0.289984 |    |
|                                                    | 0.786626 | 0.383971 | 0.435398 |    |
|                                                    | 0.872722 | 0.302008 | 0.285286 |    |
|                                                    | 0.038958 | 0.634784 | 0.448411 |    |
|                                                    | 0.126139 | 0.552039 | 0.284089 |    |
|                                                    | 0.275371 | 0.62978  | 0.446922 |    |

|  |          |          |          |  |
|--|----------|----------|----------|--|
|  | 0.368567 | 0.549849 | 0.282808 |  |
|  | 0.542398 | 0.635506 | 0.435531 |  |
|  | 0.619172 | 0.557887 | 0.284717 |  |
|  | 0.793351 | 0.640624 | 0.447018 |  |
|  | 0.871695 | 0.549621 | 0.286318 |  |
|  | 0.038475 | 0.886567 | 0.445971 |  |
|  | 0.121063 | 0.802588 | 0.281087 |  |
|  | 0.28392  | 0.885443 | 0.447904 |  |
|  | 0.366817 | 0.801511 | 0.280271 |  |
|  | 0.540663 | 0.893299 | 0.439456 |  |
|  | 0.621471 | 0.801011 | 0.288126 |  |
|  | 0.797528 | 0.890448 | 0.448917 |  |
|  | 0.881532 | 0.807899 | 0.281643 |  |
|  | 0.503198 | 0.499532 | 0.772556 |  |
|  | 0.583811 | 0.874159 | 0.783367 |  |
|  | 0.608284 | 0.446447 | 0.718026 |  |
|  | 0.602188 | 0.629755 | 0.85345  |  |
|  | 0.509818 | 0.703673 | 0.633589 |  |
|  | 0.440225 | 0.753102 | 0.721235 |  |
|  | 0.687464 | 0.550773 | 0.623624 |  |
|  | 0.690949 | 0.794911 | 0.800891 |  |
|  | 0.458366 | 0.722872 | 0.514894 |  |
|  | 0.696918 | 0.724184 | 0.672172 |  |
|  | 0.515693 | 0.499842 | 0.547077 |  |

|                                    |          |          |          |  |
|------------------------------------|----------|----------|----------|--|
| S <sub>8</sub> -Pd@VS <sub>2</sub> |          |          |          |  |
|                                    | 1        |          |          |  |
|                                    | 12.884   | 0        | 0        |  |
|                                    | -6.442   | 11.15787 | 0        |  |
|                                    | 0        | 0        | 17.8775  |  |
|                                    | V        | S        | Pd       |  |
|                                    | 16       | 40       | 1        |  |
| Direct                             |          |          |          |  |
|                                    | 0.207471 | 0.20491  | 0.358869 |  |
|                                    | 0.472761 | 0.236503 | 0.356712 |  |
|                                    | 0.700241 | 0.19228  | 0.360361 |  |
|                                    | 0.966415 | 0.217721 | 0.355085 |  |
|                                    | 0.216987 | 0.455776 | 0.358329 |  |
|                                    | 0.451808 | 0.45886  | 0.360386 |  |
|                                    | 0.707076 | 0.479913 | 0.358818 |  |
|                                    | 0.984166 | 0.480118 | 0.359833 |  |
|                                    | 0.207363 | 0.736523 | 0.354739 |  |
|                                    | 0.467108 | 0.705343 | 0.361507 |  |
|                                    | 0.720725 | 0.727025 | 0.359416 |  |
|                                    | 0.948282 | 0.712831 | 0.357453 |  |
|                                    | 0.19419  | 0.963973 | 0.357929 |  |
|                                    | 0.43991  | 0.974043 | 0.353858 |  |
|                                    | 0.725593 | 0.961468 | 0.356529 |  |
|                                    | 0.965483 | 0.968816 | 0.358076 |  |
|                                    | 0.043059 | 0.1336   | 0.439713 |  |
|                                    | 0.124442 | 0.049596 | 0.272474 |  |
|                                    | 0.291685 | 0.132229 | 0.438635 |  |
|                                    | 0.37236  | 0.056127 | 0.274379 |  |
|                                    | 0.538576 | 0.133226 | 0.439122 |  |
|                                    | 0.622343 | 0.041941 | 0.277    |  |
|                                    | 0.794862 | 0.130003 | 0.439598 |  |
|                                    | 0.880183 | 0.051792 | 0.273444 |  |
|                                    | 0.046771 | 0.382676 | 0.439542 |  |
|                                    | 0.127416 | 0.299092 | 0.274473 |  |
|                                    | 0.291992 | 0.378063 | 0.442645 |  |
|                                    | 0.376497 | 0.300759 | 0.275868 |  |
|                                    | 0.545105 | 0.384412 | 0.443416 |  |
|                                    | 0.62941  | 0.302394 | 0.279182 |  |
|                                    | 0.795859 | 0.382096 | 0.427617 |  |
|                                    | 0.875119 | 0.301156 | 0.283336 |  |
|                                    | 0.045011 | 0.638497 | 0.439791 |  |
|                                    | 0.134396 | 0.554928 | 0.276784 |  |
|                                    | 0.287013 | 0.631629 | 0.431772 |  |

|  |          |          |          |  |
|--|----------|----------|----------|--|
|  | 0.37763  | 0.54679  | 0.276075 |  |
|  | 0.549708 | 0.628642 | 0.441834 |  |
|  | 0.625117 | 0.553492 | 0.278105 |  |
|  | 0.79473  | 0.635512 | 0.443569 |  |
|  | 0.875938 | 0.548642 | 0.279734 |  |
|  | 0.039924 | 0.884031 | 0.441863 |  |
|  | 0.120579 | 0.80183  | 0.273147 |  |
|  | 0.288393 | 0.888214 | 0.440738 |  |
|  | 0.376771 | 0.800483 | 0.280568 |  |
|  | 0.546527 | 0.8901   | 0.427412 |  |
|  | 0.628744 | 0.798396 | 0.27587  |  |
|  | 0.798407 | 0.885674 | 0.443032 |  |
|  | 0.876202 | 0.800604 | 0.274874 |  |
|  | 0.229046 | 0.524038 | 0.631614 |  |
|  | 0.303188 | 0.431413 | 0.681585 |  |
|  | 0.289733 | 0.685663 | 0.682568 |  |
|  | 0.453514 | 0.463927 | 0.621847 |  |
|  | 0.444476 | 0.811361 | 0.624674 |  |
|  | 0.605044 | 0.587251 | 0.678222 |  |
|  | 0.598132 | 0.844701 | 0.686708 |  |
|  | 0.669169 | 0.756037 | 0.632178 |  |
|  | 0.457996 | 0.728373 | 0.509634 |  |

|                                      |          |          |          |    |
|--------------------------------------|----------|----------|----------|----|
| Li <sub>2</sub> S-Nb@VS <sub>2</sub> |          |          |          |    |
|                                      | 1        |          |          |    |
|                                      | 12.884   | 0        | 0        |    |
|                                      | -6.442   | 11.15787 | 0        |    |
|                                      | 0        | 0        | 17.8775  |    |
|                                      | V        | S        | Nb       | Li |
|                                      | 16       | 33       | 1        | 2  |
| Direct                               |          |          |          |    |
|                                      | 0.477094 | 0.233906 | 0.360855 |    |
|                                      | 0.706142 | 0.197313 | 0.360621 |    |
|                                      | 0.964317 | 0.233658 | 0.359709 |    |
|                                      | 0.191046 | 0.450165 | 0.359657 |    |
|                                      | 0.492745 | 0.468916 | 0.361792 |    |
|                                      | 0.719235 | 0.448986 | 0.364673 |    |
|                                      | 0.959211 | 0.465986 | 0.363209 |    |
|                                      | 0.205977 | 0.747646 | 0.360719 |    |
|                                      | 0.46404  | 0.683576 | 0.351481 |    |
|                                      | 0.720152 | 0.734017 | 0.359264 |    |
|                                      | 0.940173 | 0.692256 | 0.362343 |    |
|                                      | 0.208491 | 0.97217  | 0.361721 |    |
|                                      | 0.445115 | 0.983097 | 0.351383 |    |
|                                      | 0.745931 | 0.985562 | 0.348918 |    |
|                                      | 0.966176 | 0.948861 | 0.360636 |    |
|                                      | 0.039799 | 0.127223 | 0.440573 |    |
|                                      | 0.126503 | 0.047679 | 0.275626 |    |
|                                      | 0.295237 | 0.132612 | 0.444488 |    |
|                                      | 0.373823 | 0.060838 | 0.274508 |    |
|                                      | 0.542224 | 0.125873 | 0.441363 |    |
|                                      | 0.622857 | 0.037414 | 0.282018 |    |
|                                      | 0.795267 | 0.125697 | 0.441468 |    |
|                                      | 0.895077 | 0.058287 | 0.274927 |    |
|                                      | 0.040865 | 0.380834 | 0.447598 |    |
|                                      | 0.125932 | 0.295851 | 0.279072 |    |
|                                      | 0.296576 | 0.3796   | 0.435102 |    |
|                                      | 0.38117  | 0.300784 | 0.285419 |    |
|                                      | 0.556345 | 0.37974  | 0.450132 |    |
|                                      | 0.631678 | 0.294949 | 0.278889 |    |
|                                      | 0.797903 | 0.373774 | 0.446866 |    |
|                                      | 0.877185 | 0.299872 | 0.278611 |    |
|                                      | 0.047485 | 0.636052 | 0.442861 |    |
|                                      | 0.135299 | 0.559147 | 0.287012 |    |
|                                      | 0.300027 | 0.645052 | 0.431801 |    |
|                                      | 0.377567 | 0.528317 | 0.280899 |    |

|  |          |          |          |  |
|--|----------|----------|----------|--|
|  | 0.563115 | 0.637453 | 0.442454 |  |
|  | 0.64007  | 0.548331 | 0.281113 |  |
|  | 0.79435  | 0.627569 | 0.443789 |  |
|  | 0.875811 | 0.540434 | 0.277163 |  |
|  | 0.042473 | 0.87517  | 0.442801 |  |
|  | 0.123174 | 0.804241 | 0.276667 |  |
|  | 0.30078  | 0.896525 | 0.444918 |  |
|  | 0.383887 | 0.798398 | 0.295585 |  |
|  | 0.545901 | 0.880003 | 0.550327 |  |
|  | 0.630448 | 0.803426 | 0.278817 |  |
|  | 0.800112 | 0.890652 | 0.440823 |  |
|  | 0.88014  | 0.793409 | 0.275905 |  |
|  | 0.376824 | 0.551276 | 0.615563 |  |
|  | 0.450668 | 0.690372 | 0.522383 |  |
|  | 0.443174 | 0.440087 | 0.534149 |  |
|  | 0.210576 | 0.451757 | 0.52832  |  |

|                                                    |          |          |          |    |
|----------------------------------------------------|----------|----------|----------|----|
| Li <sub>2</sub> S <sub>2</sub> -Nb@VS <sub>2</sub> |          |          |          |    |
|                                                    | 1        |          |          |    |
|                                                    | 12.884   | 0        | 0        |    |
|                                                    | -6.442   | 11.15787 | 0        |    |
|                                                    | 0        | 0        | 17.8775  |    |
|                                                    | V        | S        | Nb       | Li |
|                                                    | 16       | 34       | 1        | 2  |
| Direct                                             |          |          |          |    |
|                                                    | 0.182484 | 0.202514 | 0.364989 |    |
|                                                    | 0.471309 | 0.225241 | 0.363513 |    |
|                                                    | 0.712959 | 0.221757 | 0.365247 |    |
|                                                    | 0.95633  | 0.233781 | 0.364141 |    |
|                                                    | 0.204025 | 0.442367 | 0.363446 |    |
|                                                    | 0.441478 | 0.437052 | 0.359056 |    |
|                                                    | 0.693799 | 0.465302 | 0.362979 |    |
|                                                    | 0.936867 | 0.464154 | 0.363736 |    |
|                                                    | 0.173282 | 0.705928 | 0.360996 |    |
|                                                    | 0.415292 | 0.680581 | 0.345973 |    |
|                                                    | 0.736373 | 0.729617 | 0.360363 |    |
|                                                    | 0.944584 | 0.698731 | 0.362751 |    |
|                                                    | 0.205591 | 0.982075 | 0.366961 |    |
|                                                    | 0.448678 | 0.992487 | 0.364868 |    |
|                                                    | 0.733561 | 0.969914 | 0.352707 |    |
|                                                    | 0.965511 | 0.956385 | 0.363962 |    |
|                                                    | 0.029695 | 0.126767 | 0.444252 |    |
|                                                    | 0.122219 | 0.048176 | 0.277881 |    |
|                                                    | 0.285687 | 0.134758 | 0.445324 |    |
|                                                    | 0.37151  | 0.057328 | 0.279654 |    |
|                                                    | 0.538896 | 0.138518 | 0.450084 |    |
|                                                    | 0.619035 | 0.042857 | 0.292122 |    |
|                                                    | 0.788236 | 0.126687 | 0.442801 |    |
|                                                    | 0.881737 | 0.051195 | 0.277759 |    |
|                                                    | 0.032866 | 0.380194 | 0.446483 |    |
|                                                    | 0.113304 | 0.290415 | 0.277684 |    |
|                                                    | 0.283842 | 0.371088 | 0.447482 |    |
|                                                    | 0.36735  | 0.288401 | 0.279288 |    |
|                                                    | 0.533664 | 0.37889  | 0.448667 |    |
|                                                    | 0.6238   | 0.300787 | 0.280698 |    |
|                                                    | 0.781687 | 0.380274 | 0.447976 |    |
|                                                    | 0.868989 | 0.301508 | 0.279511 |    |
|                                                    | 0.027105 | 0.626317 | 0.449236 |    |
|                                                    | 0.115026 | 0.542117 | 0.289359 |    |
|                                                    | 0.27313  | 0.613796 | 0.441913 |    |

|  |          |          |          |  |
|--|----------|----------|----------|--|
|  | 0.354044 | 0.523564 | 0.272762 |  |
|  | 0.536555 | 0.635367 | 0.425477 |  |
|  | 0.616579 | 0.551211 | 0.285528 |  |
|  | 0.784857 | 0.63085  | 0.448584 |  |
|  | 0.862784 | 0.544562 | 0.278971 |  |
|  | 0.041158 | 0.879363 | 0.44593  |  |
|  | 0.113932 | 0.796261 | 0.281785 |  |
|  | 0.284374 | 0.8807   | 0.440225 |  |
|  | 0.367879 | 0.804441 | 0.290726 |  |
|  | 0.536083 | 0.897506 | 0.459025 |  |
|  | 0.614182 | 0.793024 | 0.291944 |  |
|  | 0.796354 | 0.883564 | 0.444183 |  |
|  | 0.880336 | 0.798909 | 0.275183 |  |
|  | 0.430412 | 0.704059 | 0.643648 |  |
|  | 0.594553 | 0.724457 | 0.607865 |  |
|  | 0.455234 | 0.716036 | 0.510738 |  |
|  | 0.600139 | 0.555076 | 0.529537 |  |
|  | 0.713304 | 0.957903 | 0.535135 |  |

|                                                    |          |          |          |    |
|----------------------------------------------------|----------|----------|----------|----|
| Li <sub>2</sub> S <sub>4</sub> -Nb@VS <sub>2</sub> |          |          |          |    |
|                                                    | 1        |          |          |    |
|                                                    | 12.884   | 0        | 0        |    |
|                                                    | -6.442   | 11.15787 | 0        |    |
|                                                    | 0        | 0        | 17.8775  |    |
|                                                    | V        | S        | Nb       | Li |
|                                                    | 16       | 36       | 1        | 2  |
| Direct                                             |          |          |          |    |
|                                                    | 0.183939 | 0.184449 | 0.365838 |    |
|                                                    | 0.470904 | 0.226826 | 0.362714 |    |
|                                                    | 0.704885 | 0.1997   | 0.364246 |    |
|                                                    | 0.954453 | 0.225083 | 0.363417 |    |
|                                                    | 0.182117 | 0.443287 | 0.363769 |    |
|                                                    | 0.483686 | 0.464068 | 0.364463 |    |
|                                                    | 0.710621 | 0.444061 | 0.366135 |    |
|                                                    | 0.951772 | 0.462668 | 0.365246 |    |
|                                                    | 0.195357 | 0.737286 | 0.362949 |    |
|                                                    | 0.454921 | 0.679892 | 0.36019  |    |
|                                                    | 0.711858 | 0.726567 | 0.363321 |    |
|                                                    | 0.932429 | 0.687995 | 0.366317 |    |
|                                                    | 0.203741 | 0.965362 | 0.363693 |    |
|                                                    | 0.439109 | 0.97454  | 0.361599 |    |
|                                                    | 0.73281  | 0.980126 | 0.360133 |    |
|                                                    | 0.956995 | 0.941568 | 0.365124 |    |
|                                                    | 0.032501 | 0.121243 | 0.444225 |    |
|                                                    | 0.115613 | 0.038761 | 0.278176 |    |
|                                                    | 0.285823 | 0.125158 | 0.445192 |    |
|                                                    | 0.368778 | 0.051042 | 0.279261 |    |
|                                                    | 0.537347 | 0.126504 | 0.446198 |    |
|                                                    | 0.617067 | 0.035716 | 0.287134 |    |
|                                                    | 0.791365 | 0.128082 | 0.44823  |    |
|                                                    | 0.879131 | 0.047932 | 0.281154 |    |
|                                                    | 0.034408 | 0.375267 | 0.450102 |    |
|                                                    | 0.116507 | 0.28979  | 0.281088 |    |
|                                                    | 0.290587 | 0.377122 | 0.43418  |    |
|                                                    | 0.372489 | 0.294497 | 0.288415 |    |
|                                                    | 0.549499 | 0.374865 | 0.451347 |    |
|                                                    | 0.624583 | 0.289811 | 0.280367 |    |
|                                                    | 0.791769 | 0.371694 | 0.449661 |    |
|                                                    | 0.869876 | 0.293955 | 0.281463 |    |
|                                                    | 0.037868 | 0.628291 | 0.44667  |    |
|                                                    | 0.125449 | 0.551431 | 0.288879 |    |
|                                                    | 0.282835 | 0.630222 | 0.436044 |    |

|  |          |          |          |  |
|--|----------|----------|----------|--|
|  | 0.371657 | 0.529103 | 0.283422 |  |
|  | 0.553731 | 0.626906 | 0.447845 |  |
|  | 0.631891 | 0.544042 | 0.28357  |  |
|  | 0.785188 | 0.620092 | 0.448439 |  |
|  | 0.868976 | 0.536928 | 0.279726 |  |
|  | 0.035688 | 0.869436 | 0.446177 |  |
|  | 0.113976 | 0.797486 | 0.279629 |  |
|  | 0.286621 | 0.884549 | 0.449448 |  |
|  | 0.371859 | 0.79151  | 0.297271 |  |
|  | 0.541459 | 0.884496 | 0.447925 |  |
|  | 0.621394 | 0.797327 | 0.284874 |  |
|  | 0.793487 | 0.881733 | 0.446733 |  |
|  | 0.870475 | 0.787312 | 0.279917 |  |
|  | 0.416916 | 0.427513 | 0.631054 |  |
|  | 0.320776 | 0.492719 | 0.579778 |  |
|  | 0.547272 | 0.746048 | 0.640924 |  |
|  | 0.364086 | 0.661599 | 0.64396  |  |
|  | 0.454771 | 0.712574 | 0.515329 |  |
|  | 0.598123 | 0.572547 | 0.571512 |  |
|  | 0.359831 | 0.29239  | 0.526896 |  |

|                                                    |          |          |          |    |
|----------------------------------------------------|----------|----------|----------|----|
| Li <sub>2</sub> S <sub>6</sub> -Nb@VS <sub>2</sub> |          |          |          |    |
|                                                    | 1        |          |          |    |
|                                                    | 12.884   | 0        | 0        |    |
|                                                    | -6.442   | 11.15787 | 0        |    |
|                                                    | 0        | 0        | 17.8775  |    |
|                                                    | V        | S        | Nb       | Li |
|                                                    | 16       | 38       | 1        | 2  |
| Direct                                             |          |          |          |    |
|                                                    | 0.179933 | 0.183309 | 0.363395 |    |
|                                                    | 0.439671 | 0.204835 | 0.360196 |    |
|                                                    | 0.67932  | 0.211422 | 0.361316 |    |
|                                                    | 0.915869 | 0.208662 | 0.358848 |    |
|                                                    | 0.175465 | 0.41539  | 0.349529 |    |
|                                                    | 0.419708 | 0.411267 | 0.36048  |    |
|                                                    | 0.676556 | 0.443738 | 0.360333 |    |
|                                                    | 0.916559 | 0.454011 | 0.360107 |    |
|                                                    | 0.162655 | 0.716443 | 0.351111 |    |
|                                                    | 0.476652 | 0.727553 | 0.353998 |    |
|                                                    | 0.703352 | 0.697367 | 0.356628 |    |
|                                                    | 0.916951 | 0.685175 | 0.358848 |    |
|                                                    | 0.182903 | 0.964382 | 0.364598 |    |
|                                                    | 0.415728 | 0.975113 | 0.364209 |    |
|                                                    | 0.69908  | 0.981572 | 0.356749 |    |
|                                                    | 0.949568 | 0.953365 | 0.365009 |    |
|                                                    | 0.012307 | 0.11796  | 0.439247 |    |
|                                                    | 0.097565 | 0.031193 | 0.275985 |    |
|                                                    | 0.265441 | 0.117101 | 0.447833 |    |
|                                                    | 0.342373 | 0.039108 | 0.275319 |    |
|                                                    | 0.515655 | 0.124459 | 0.447661 |    |
|                                                    | 0.589775 | 0.03657  | 0.283776 |    |
|                                                    | 0.767974 | 0.128237 | 0.445132 |    |
|                                                    | 0.854544 | 0.043904 | 0.278406 |    |
|                                                    | 0.023923 | 0.376244 | 0.435035 |    |
|                                                    | 0.090523 | 0.267299 | 0.274316 |    |
|                                                    | 0.259735 | 0.359882 | 0.441925 |    |
|                                                    | 0.342704 | 0.271065 | 0.274204 |    |
|                                                    | 0.514585 | 0.360805 | 0.447082 |    |
|                                                    | 0.596607 | 0.284777 | 0.275629 |    |
|                                                    | 0.764426 | 0.369072 | 0.445957 |    |
|                                                    | 0.843886 | 0.290356 | 0.276019 |    |
|                                                    | 0.016953 | 0.619261 | 0.440816 |    |
|                                                    | 0.104709 | 0.536247 | 0.292252 |    |
|                                                    | 0.367069 | 0.679999 | 0.584304 |    |

|  |          |          |          |  |
|--|----------|----------|----------|--|
|  | 0.351799 | 0.539551 | 0.294257 |  |
|  | 0.512583 | 0.607143 | 0.42781  |  |
|  | 0.589843 | 0.52873  | 0.28237  |  |
|  | 0.766156 | 0.613013 | 0.444865 |  |
|  | 0.841071 | 0.531576 | 0.274508 |  |
|  | 0.014843 | 0.863782 | 0.444651 |  |
|  | 0.089369 | 0.79151  | 0.275422 |  |
|  | 0.257617 | 0.863554 | 0.443006 |  |
|  | 0.347989 | 0.783106 | 0.297135 |  |
|  | 0.516698 | 0.881886 | 0.43227  |  |
|  | 0.624784 | 0.801252 | 0.276617 |  |
|  | 0.762205 | 0.867738 | 0.435782 |  |
|  | 0.854869 | 0.785098 | 0.275272 |  |
|  | 0.625942 | 0.642143 | 0.589626 |  |
|  | 0.625123 | 0.659226 | 0.70639  |  |
|  | 0.835513 | 0.942629 | 0.734177 |  |
|  | 0.801631 | 0.769063 | 0.739963 |  |
|  | 0.653038 | 0.938089 | 0.601153 |  |
|  | 0.828932 | 0.979199 | 0.621851 |  |
|  | 0.535947 | 0.751028 | 0.521877 |  |
|  | 0.524535 | 0.777721 | 0.684317 |  |
|  | 0.831627 | 0.797811 | 0.540114 |  |

|                                                    |          |          |          |    |
|----------------------------------------------------|----------|----------|----------|----|
| Li <sub>2</sub> S <sub>8</sub> -Nb@VS <sub>2</sub> |          |          |          |    |
|                                                    | 1        |          |          |    |
|                                                    | 12.884   | 0        | 0        |    |
|                                                    | -6.442   | 11.15787 | 0        |    |
|                                                    | 0        | 0        | 17.8775  |    |
|                                                    | V        | S        | Nb       | Li |
|                                                    | 16       | 40       | 1        | 2  |
| Direct                                             |          |          |          |    |
|                                                    | 0.186142 | 0.201475 | 0.35911  |    |
|                                                    | 0.474013 | 0.213471 | 0.361538 |    |
|                                                    | 0.72616  | 0.235073 | 0.361923 |    |
|                                                    | 0.947926 | 0.219957 | 0.359473 |    |
|                                                    | 0.191295 | 0.438073 | 0.358606 |    |
|                                                    | 0.433517 | 0.433252 | 0.355248 |    |
|                                                    | 0.700422 | 0.457597 | 0.363015 |    |
|                                                    | 0.965194 | 0.476294 | 0.3621   |    |
|                                                    | 0.186548 | 0.725846 | 0.358447 |    |
|                                                    | 0.482099 | 0.750005 | 0.352625 |    |
|                                                    | 0.731573 | 0.727001 | 0.367773 |    |
|                                                    | 0.941153 | 0.699745 | 0.363199 |    |
|                                                    | 0.219765 | 0.984485 | 0.360871 |    |
|                                                    | 0.436345 | 0.959443 | 0.359326 |    |
|                                                    | 0.718734 | 0.993101 | 0.358307 |    |
|                                                    | 0.971312 | 0.960513 | 0.363321 |    |
|                                                    | 0.034715 | 0.127351 | 0.44201  |    |
|                                                    | 0.12088  | 0.043635 | 0.274652 |    |
|                                                    | 0.292067 | 0.136532 | 0.44052  |    |
|                                                    | 0.375103 | 0.052431 | 0.274952 |    |
|                                                    | 0.543364 | 0.132392 | 0.441979 |    |
|                                                    | 0.624235 | 0.057564 | 0.283757 |    |
|                                                    | 0.794108 | 0.142069 | 0.446321 |    |
|                                                    | 0.875528 | 0.052608 | 0.28043  |    |
|                                                    | 0.041416 | 0.383785 | 0.443826 |    |
|                                                    | 0.115769 | 0.291671 | 0.273697 |    |
|                                                    | 0.28061  | 0.368254 | 0.439708 |    |
|                                                    | 0.367404 | 0.28781  | 0.275593 |    |
|                                                    | 0.53469  | 0.377846 | 0.442033 |    |
|                                                    | 0.62911  | 0.301761 | 0.277387 |    |
|                                                    | 0.793467 | 0.387629 | 0.446311 |    |
|                                                    | 0.878928 | 0.308036 | 0.277029 |    |
|                                                    | 0.038036 | 0.635251 | 0.446796 |    |
|                                                    | 0.128609 | 0.553581 | 0.2843   |    |
|                                                    | 0.290768 | 0.638844 | 0.433573 |    |

|  |          |          |          |  |
|--|----------|----------|----------|--|
|  | 0.37481  | 0.552947 | 0.292081 |  |
|  | 0.537981 | 0.631167 | 0.434327 |  |
|  | 0.619482 | 0.551194 | 0.290514 |  |
|  | 0.788036 | 0.629459 | 0.449967 |  |
|  | 0.870355 | 0.547361 | 0.280152 |  |
|  | 0.0447   | 0.88257  | 0.44258  |  |
|  | 0.114291 | 0.799942 | 0.278157 |  |
|  | 0.284435 | 0.885414 | 0.443897 |  |
|  | 0.367408 | 0.799159 | 0.278191 |  |
|  | 0.538497 | 0.893072 | 0.44099  |  |
|  | 0.636383 | 0.810452 | 0.278358 |  |
|  | 0.794372 | 0.89017  | 0.439364 |  |
|  | 0.874832 | 0.796104 | 0.279098 |  |
|  | 0.341496 | 0.63938  | 0.640917 |  |
|  | 0.402672 | 0.364802 | 0.713541 |  |
|  | 0.548559 | 0.885256 | 0.623247 |  |
|  | 0.304691 | 0.493211 | 0.574882 |  |
|  | 0.648387 | 0.632798 | 0.739824 |  |
|  | 0.488203 | 0.510749 | 0.786033 |  |
|  | 0.651831 | 0.819823 | 0.580356 |  |
|  | 0.425035 | 0.427954 | 0.607845 |  |
|  | 0.451923 | 0.71224  | 0.524221 |  |
|  | 0.630612 | 0.610962 | 0.60419  |  |
|  | 0.538666 | 0.730826 | 0.708569 |  |

|                                    |          |          |          |
|------------------------------------|----------|----------|----------|
| S <sub>8</sub> -Nb@VS <sub>2</sub> |          |          |          |
|                                    | 1        |          |          |
|                                    | 12.884   | 0        | 0        |
|                                    | -6.442   | 11.15787 | 0        |
|                                    | 0        | 0        | 17.8775  |
|                                    | V        | S        | Nb       |
|                                    | 16       | 40       | 1        |
| Direct                             |          |          |          |
|                                    | 0.186042 | 0.197308 | 0.356852 |
|                                    | 0.475321 | 0.213948 | 0.355401 |
|                                    | 0.721986 | 0.223364 | 0.356679 |
|                                    | 0.950499 | 0.21938  | 0.354216 |
|                                    | 0.185607 | 0.427096 | 0.354184 |
|                                    | 0.432854 | 0.429699 | 0.348036 |
|                                    | 0.703702 | 0.455653 | 0.355205 |
|                                    | 0.959622 | 0.464584 | 0.355488 |
|                                    | 0.188878 | 0.721607 | 0.353863 |
|                                    | 0.462557 | 0.747544 | 0.359272 |
|                                    | 0.737623 | 0.72209  | 0.35719  |
|                                    | 0.945805 | 0.691544 | 0.354659 |
|                                    | 0.214978 | 0.980179 | 0.358786 |
|                                    | 0.439018 | 0.966422 | 0.35926  |
|                                    | 0.732921 | 0.983746 | 0.352988 |
|                                    | 0.971186 | 0.955749 | 0.358738 |
|                                    | 0.034004 | 0.122452 | 0.438125 |
|                                    | 0.123611 | 0.042101 | 0.270669 |
|                                    | 0.291962 | 0.13446  | 0.436993 |
|                                    | 0.374885 | 0.050679 | 0.272604 |
|                                    | 0.544057 | 0.136342 | 0.440172 |
|                                    | 0.623026 | 0.045249 | 0.284522 |
|                                    | 0.796574 | 0.135978 | 0.440747 |
|                                    | 0.880532 | 0.048652 | 0.273141 |
|                                    | 0.037991 | 0.376169 | 0.440318 |
|                                    | 0.114957 | 0.28438  | 0.268173 |
|                                    | 0.283484 | 0.368195 | 0.437472 |
|                                    | 0.366043 | 0.283312 | 0.270383 |
|                                    | 0.536545 | 0.378632 | 0.435411 |
|                                    | 0.62844  | 0.294875 | 0.27143  |
|                                    | 0.792312 | 0.382113 | 0.439088 |
|                                    | 0.875062 | 0.298365 | 0.270515 |
|                                    | 0.036487 | 0.626429 | 0.440283 |
|                                    | 0.129659 | 0.547828 | 0.280065 |
|                                    | 0.281924 | 0.622107 | 0.426866 |

|  |          |          |          |
|--|----------|----------|----------|
|  | 0.37343  | 0.549726 | 0.290042 |
|  | 0.54535  | 0.627927 | 0.432786 |
|  | 0.619924 | 0.546759 | 0.28254  |
|  | 0.791575 | 0.6247   | 0.440831 |
|  | 0.872034 | 0.540003 | 0.27138  |
|  | 0.044258 | 0.875836 | 0.437652 |
|  | 0.117172 | 0.796469 | 0.273223 |
|  | 0.284099 | 0.880495 | 0.441527 |
|  | 0.36784  | 0.804522 | 0.276547 |
|  | 0.549437 | 0.903419 | 0.44398  |
|  | 0.628079 | 0.798294 | 0.285312 |
|  | 0.797242 | 0.881703 | 0.436862 |
|  | 0.880511 | 0.793755 | 0.271208 |
|  | 0.289981 | 0.520259 | 0.591487 |
|  | 0.376208 | 0.449183 | 0.656929 |
|  | 0.266403 | 0.640263 | 0.658617 |
|  | 0.543062 | 0.515809 | 0.611396 |
|  | 0.393525 | 0.806725 | 0.617497 |
|  | 0.661878 | 0.676386 | 0.659076 |
|  | 0.559894 | 0.874315 | 0.669148 |
|  | 0.648782 | 0.812574 | 0.600841 |
|  | 0.454359 | 0.706689 | 0.500376 |

|                                      |          |          |          |    |
|--------------------------------------|----------|----------|----------|----|
| Li <sub>2</sub> S-Zr@VS <sub>2</sub> |          |          |          |    |
|                                      | 1        |          |          |    |
|                                      | 12.884   | 0        | 0        |    |
|                                      | -6.442   | 11.15787 | 0        |    |
|                                      | 0        | 0        | 17.8775  |    |
|                                      | V        | S        | Zr       | Li |
|                                      | 16       | 33       | 1        | 2  |
| Direct                               |          |          |          |    |
|                                      | 0.240354 | 0.226277 | 0.361841 |    |
|                                      | 0.471924 | 0.213195 | 0.363982 |    |
|                                      | 0.71927  | 0.23335  | 0.362625 |    |
|                                      | 0.934808 | 0.188188 | 0.357474 |    |
|                                      | 0.233104 | 0.453791 | 0.358105 |    |
|                                      | 0.474082 | 0.46714  | 0.363467 |    |
|                                      | 0.697871 | 0.453896 | 0.364914 |    |
|                                      | 0.958287 | 0.492386 | 0.367359 |    |
|                                      | 0.19464  | 0.729505 | 0.368104 |    |
|                                      | 0.49238  | 0.746316 | 0.35627  |    |
|                                      | 0.719879 | 0.699681 | 0.365032 |    |
|                                      | 0.963885 | 0.720109 | 0.368124 |    |
|                                      | 0.22996  | 0.988199 | 0.363671 |    |
|                                      | 0.453471 | 0.962271 | 0.363021 |    |
|                                      | 0.70317  | 0.981822 | 0.356473 |    |
|                                      | 0.954813 | 0.943756 | 0.36729  |    |
|                                      | 0.04654  | 0.133109 | 0.434879 |    |
|                                      | 0.132206 | 0.054245 | 0.28605  |    |
|                                      | 0.306448 | 0.140038 | 0.448568 |    |
|                                      | 0.382456 | 0.052103 | 0.279747 |    |
|                                      | 0.551059 | 0.134267 | 0.444403 |    |
|                                      | 0.625149 | 0.057112 | 0.278131 |    |
|                                      | 0.791311 | 0.131619 | 0.444847 |    |
|                                      | 0.873157 | 0.04321  | 0.276178 |    |
|                                      | 0.040115 | 0.374334 | 0.436342 |    |
|                                      | 0.131145 | 0.295784 | 0.285686 |    |
|                                      | 0.308162 | 0.38342  | 0.447471 |    |
|                                      | 0.390086 | 0.302366 | 0.278709 |    |
|                                      | 0.547587 | 0.381612 | 0.448975 |    |
|                                      | 0.633263 | 0.302765 | 0.277927 |    |
|                                      | 0.793964 | 0.38577  | 0.449004 |    |
|                                      | 0.888727 | 0.312038 | 0.287393 |    |
|                                      | 0.038258 | 0.646682 | 0.45762  |    |
|                                      | 0.132722 | 0.552481 | 0.297557 |    |
|                                      | 0.308936 | 0.64466  | 0.438265 |    |

|  |          |          |          |  |
|--|----------|----------|----------|--|
|  | 0.390931 | 0.557029 | 0.283801 |  |
|  | 0.552525 | 0.640825 | 0.441425 |  |
|  | 0.63372  | 0.547614 | 0.278176 |  |
|  | 0.792295 | 0.628838 | 0.449403 |  |
|  | 0.87936  | 0.556542 | 0.2828   |  |
|  | 0.049692 | 0.890399 | 0.448199 |  |
|  | 0.127507 | 0.80722  | 0.283559 |  |
|  | 0.297992 | 0.892206 | 0.4487   |  |
|  | 0.37037  | 0.794817 | 0.2874   |  |
|  | 0.551259 | 0.891699 | 0.444458 |  |
|  | 0.638338 | 0.80793  | 0.277122 |  |
|  | 0.792917 | 0.8826   | 0.437751 |  |
|  | 0.879583 | 0.796863 | 0.279757 |  |
|  | 0.205389 | 0.473174 | 0.615176 |  |
|  | 0.137453 | 0.542933 | 0.515209 |  |
|  | 0.388034 | 0.558707 | 0.536594 |  |
|  | 0.126288 | 0.290587 | 0.534565 |  |

|                                                    |          |          |          |    |
|----------------------------------------------------|----------|----------|----------|----|
| Li <sub>2</sub> S <sub>2</sub> -Zr@VS <sub>2</sub> |          |          |          |    |
|                                                    | 1        |          |          |    |
|                                                    | 12.884   | 0        | 0        |    |
|                                                    | -6.442   | 11.15787 | 0        |    |
|                                                    | 0        | 0        | 17.8775  |    |
|                                                    | V        | S        | Zr       | Li |
|                                                    | 16       | 34       | 1        | 2  |
| Direct                                             |          |          |          |    |
|                                                    | 0.241657 | 0.228791 | 0.362849 |    |
|                                                    | 0.468872 | 0.208129 | 0.363407 |    |
|                                                    | 0.70656  | 0.214679 | 0.361849 |    |
|                                                    | 0.932607 | 0.187908 | 0.357218 |    |
|                                                    | 0.23327  | 0.454517 | 0.359301 |    |
|                                                    | 0.474607 | 0.471362 | 0.363465 |    |
|                                                    | 0.694024 | 0.446603 | 0.362667 |    |
|                                                    | 0.958901 | 0.492416 | 0.365481 |    |
|                                                    | 0.201044 | 0.736182 | 0.367415 |    |
|                                                    | 0.493888 | 0.749594 | 0.354176 |    |
|                                                    | 0.721397 | 0.700149 | 0.362415 |    |
|                                                    | 0.970539 | 0.725811 | 0.363996 |    |
|                                                    | 0.228761 | 0.988536 | 0.361582 |    |
|                                                    | 0.46437  | 0.966896 | 0.361763 |    |
|                                                    | 0.707095 | 0.979028 | 0.356108 |    |
|                                                    | 0.948632 | 0.942132 | 0.363646 |    |
|                                                    | 0.0447   | 0.131031 | 0.432747 |    |
|                                                    | 0.132737 | 0.056993 | 0.285658 |    |
|                                                    | 0.304786 | 0.139244 | 0.448547 |    |
|                                                    | 0.383085 | 0.051804 | 0.278575 |    |
|                                                    | 0.548334 | 0.132778 | 0.447039 |    |
|                                                    | 0.626135 | 0.053664 | 0.275123 |    |
|                                                    | 0.79     | 0.128169 | 0.445432 |    |
|                                                    | 0.874385 | 0.044015 | 0.274262 |    |
|                                                    | 0.038873 | 0.373657 | 0.43723  |    |
|                                                    | 0.131237 | 0.297127 | 0.286608 |    |
|                                                    | 0.309355 | 0.386226 | 0.449252 |    |
|                                                    | 0.389129 | 0.302696 | 0.279487 |    |
|                                                    | 0.546946 | 0.380484 | 0.447335 |    |
|                                                    | 0.629263 | 0.295741 | 0.276836 |    |
|                                                    | 0.793732 | 0.382402 | 0.444581 |    |
|                                                    | 0.885428 | 0.31025  | 0.288901 |    |
|                                                    | 0.039237 | 0.649995 | 0.454523 |    |
|                                                    | 0.134121 | 0.552657 | 0.299059 |    |
|                                                    | 0.310704 | 0.648393 | 0.4364   |    |

|  |          |          |          |  |
|--|----------|----------|----------|--|
|  | 0.390875 | 0.559241 | 0.284022 |  |
|  | 0.555947 | 0.643445 | 0.439589 |  |
|  | 0.632903 | 0.545411 | 0.277033 |  |
|  | 0.793771 | 0.627446 | 0.444418 |  |
|  | 0.879246 | 0.555145 | 0.281341 |  |
|  | 0.048233 | 0.891514 | 0.444723 |  |
|  | 0.131655 | 0.809675 | 0.279805 |  |
|  | 0.300176 | 0.894561 | 0.447069 |  |
|  | 0.372827 | 0.798463 | 0.284998 |  |
|  | 0.553286 | 0.892581 | 0.444581 |  |
|  | 0.639027 | 0.807608 | 0.274685 |  |
|  | 0.792321 | 0.879814 | 0.438273 |  |
|  | 0.879778 | 0.796617 | 0.276095 |  |
|  | 0.136146 | 0.546715 | 0.651124 |  |
|  | 0.229288 | 0.464517 | 0.607256 |  |
|  | 0.135905 | 0.548301 | 0.513945 |  |
|  | 0.11881  | 0.279379 | 0.529123 |  |
|  | 0.408757 | 0.593478 | 0.534657 |  |

|                                                    |          |          |          |    |
|----------------------------------------------------|----------|----------|----------|----|
| Li <sub>2</sub> S <sub>4</sub> -Zr@VS <sub>2</sub> |          |          |          |    |
|                                                    | 1        |          |          |    |
|                                                    | 12.884   | 0        | 0        |    |
|                                                    | -6.442   | 11.15787 | 0        |    |
|                                                    | 0        | 0        | 17.8775  |    |
|                                                    | V        | S        | Zr       | Li |
|                                                    | 16       | 36       | 1        | 2  |
| Direct                                             |          |          |          |    |
|                                                    | 0.21788  | 0.206458 | 0.358407 |    |
|                                                    | 0.464652 | 0.207217 | 0.361744 |    |
|                                                    | 0.721515 | 0.230559 | 0.361057 |    |
|                                                    | 0.943685 | 0.18535  | 0.360369 |    |
|                                                    | 0.228135 | 0.444748 | 0.353645 |    |
|                                                    | 0.460811 | 0.440867 | 0.358084 |    |
|                                                    | 0.698444 | 0.450749 | 0.36172  |    |
|                                                    | 0.954051 | 0.482261 | 0.364061 |    |
|                                                    | 0.191972 | 0.719511 | 0.363019 |    |
|                                                    | 0.492717 | 0.744555 | 0.356835 |    |
|                                                    | 0.737856 | 0.723182 | 0.365832 |    |
|                                                    | 0.967439 | 0.722264 | 0.363996 |    |
|                                                    | 0.223685 | 0.977313 | 0.361887 |    |
|                                                    | 0.447519 | 0.962653 | 0.361555 |    |
|                                                    | 0.702502 | 0.977661 | 0.355835 |    |
|                                                    | 0.981698 | 0.962249 | 0.360897 |    |
|                                                    | 0.046581 | 0.126651 | 0.440433 |    |
|                                                    | 0.133554 | 0.045275 | 0.274403 |    |
|                                                    | 0.299027 | 0.130362 | 0.445811 |    |
|                                                    | 0.378919 | 0.046719 | 0.275678 |    |
|                                                    | 0.547123 | 0.128849 | 0.442199 |    |
|                                                    | 0.626678 | 0.054242 | 0.277456 |    |
|                                                    | 0.791549 | 0.129053 | 0.443631 |    |
|                                                    | 0.875512 | 0.040712 | 0.277174 |    |
|                                                    | 0.042756 | 0.372337 | 0.433453 |    |
|                                                    | 0.125525 | 0.287157 | 0.278554 |    |
|                                                    | 0.298221 | 0.371044 | 0.440203 |    |
|                                                    | 0.381236 | 0.289007 | 0.274592 |    |
|                                                    | 0.5436   | 0.373741 | 0.446089 |    |
|                                                    | 0.629338 | 0.29579  | 0.277639 |    |
|                                                    | 0.79317  | 0.381869 | 0.446927 |    |
|                                                    | 0.886154 | 0.303843 | 0.28654  |    |
|                                                    | 0.039192 | 0.638091 | 0.451662 |    |
|                                                    | 0.128848 | 0.545643 | 0.291991 |    |
|                                                    | 0.302016 | 0.63008  | 0.431628 |    |

|  |          |          |          |  |
|--|----------|----------|----------|--|
|  | 0.38888  | 0.549648 | 0.282402 |  |
|  | 0.549759 | 0.630497 | 0.432031 |  |
|  | 0.630157 | 0.546842 | 0.282606 |  |
|  | 0.796507 | 0.630167 | 0.444908 |  |
|  | 0.875568 | 0.551398 | 0.281149 |  |
|  | 0.052431 | 0.885945 | 0.446677 |  |
|  | 0.127043 | 0.800324 | 0.278422 |  |
|  | 0.294274 | 0.882595 | 0.445655 |  |
|  | 0.372689 | 0.792804 | 0.285589 |  |
|  | 0.54942  | 0.887827 | 0.444029 |  |
|  | 0.638612 | 0.806336 | 0.275989 |  |
|  | 0.800157 | 0.885415 | 0.436436 |  |
|  | 0.884408 | 0.799134 | 0.27725  |  |
|  | 0.252734 | 0.712512 | 0.614913 |  |
|  | 0.079638 | 0.586228 | 0.650365 |  |
|  | 0.373189 | 0.492064 | 0.644374 |  |
|  | 0.210101 | 0.40335  | 0.588723 |  |
|  | 0.139827 | 0.538025 | 0.526904 |  |
|  | 0.435266 | 0.623937 | 0.540891 |  |
|  | 0.240211 | 0.550358 | 0.692773 |  |

|                                                    |          |          |          |    |
|----------------------------------------------------|----------|----------|----------|----|
| Li <sub>2</sub> S <sub>6</sub> -Zr@VS <sub>2</sub> |          |          |          |    |
|                                                    | 1        |          |          |    |
|                                                    | 12.884   | 0        | 0        |    |
|                                                    | -6.442   | 11.15787 | 0        |    |
|                                                    | 0        | 0        | 17.8775  |    |
|                                                    | V        | S        | Zr       | Li |
|                                                    | 16       | 38       | 1        | 2  |
| Direct                                             |          |          |          |    |
|                                                    | 0.199427 | 0.199318 | 0.360954 |    |
|                                                    | 0.473303 | 0.201862 | 0.363645 |    |
|                                                    | 0.729986 | 0.222658 | 0.360593 |    |
|                                                    | 0.942621 | 0.182829 | 0.355666 |    |
|                                                    | 0.234988 | 0.447963 | 0.354779 |    |
|                                                    | 0.458517 | 0.432601 | 0.357629 |    |
|                                                    | 0.697774 | 0.445757 | 0.360658 |    |
|                                                    | 0.955458 | 0.47847  | 0.364363 |    |
|                                                    | 0.190428 | 0.714375 | 0.362033 |    |
|                                                    | 0.493183 | 0.73968  | 0.355157 |    |
|                                                    | 0.739907 | 0.723632 | 0.363267 |    |
|                                                    | 0.962817 | 0.71249  | 0.363667 |    |
|                                                    | 0.22779  | 0.976697 | 0.364633 |    |
|                                                    | 0.449706 | 0.955122 | 0.363247 |    |
|                                                    | 0.704854 | 0.970569 | 0.354499 |    |
|                                                    | 0.976807 | 0.953286 | 0.362591 |    |
|                                                    | 0.039888 | 0.121471 | 0.442318 |    |
|                                                    | 0.132672 | 0.04147  | 0.277305 |    |
|                                                    | 0.299301 | 0.130963 | 0.44471  |    |
|                                                    | 0.380517 | 0.041973 | 0.277773 |    |
|                                                    | 0.549857 | 0.124252 | 0.444144 |    |
|                                                    | 0.625959 | 0.048841 | 0.278107 |    |
|                                                    | 0.794608 | 0.124951 | 0.442671 |    |
|                                                    | 0.876453 | 0.036489 | 0.274619 |    |
|                                                    | 0.046097 | 0.373122 | 0.431747 |    |
|                                                    | 0.12469  | 0.288124 | 0.279928 |    |
|                                                    | 0.299038 | 0.36973  | 0.442443 |    |
|                                                    | 0.378583 | 0.282562 | 0.278345 |    |
|                                                    | 0.543439 | 0.369087 | 0.445763 |    |
|                                                    | 0.631375 | 0.289993 | 0.278627 |    |
|                                                    | 0.793258 | 0.375976 | 0.44557  |    |
|                                                    | 0.887389 | 0.301461 | 0.282092 |    |
|                                                    | 0.03524  | 0.633499 | 0.451712 |    |
|                                                    | 0.13031  | 0.542559 | 0.291458 |    |
|                                                    | 0.299838 | 0.626928 | 0.433322 |    |

|  |          |          |          |  |
|--|----------|----------|----------|--|
|  | 0.39056  | 0.545219 | 0.280505 |  |
|  | 0.550243 | 0.627583 | 0.43041  |  |
|  | 0.62987  | 0.542424 | 0.283594 |  |
|  | 0.79352  | 0.626285 | 0.443736 |  |
|  | 0.875972 | 0.546163 | 0.27984  |  |
|  | 0.05026  | 0.881541 | 0.446848 |  |
|  | 0.127446 | 0.797288 | 0.278976 |  |
|  | 0.292233 | 0.876671 | 0.442953 |  |
|  | 0.372477 | 0.78802  | 0.284469 |  |
|  | 0.5534   | 0.885585 | 0.442759 |  |
|  | 0.639289 | 0.801566 | 0.273661 |  |
|  | 0.800286 | 0.881238 | 0.437949 |  |
|  | 0.886805 | 0.795947 | 0.275661 |  |
|  | 0.482073 | 0.772263 | 0.650705 |  |
|  | 0.373565 | 0.845293 | 0.653655 |  |
|  | 0.039603 | 0.527431 | 0.657997 |  |
|  | 0.240346 | 0.778171 | 0.576984 |  |
|  | 0.241199 | 0.460295 | 0.616291 |  |
|  | 0.056378 | 0.380211 | 0.632445 |  |
|  | 0.130096 | 0.533185 | 0.525747 |  |
|  | 0.278892 | 0.630688 | 0.693603 |  |
|  | 0.472358 | 0.704472 | 0.523598 |  |

|                                                    |          |          |          |    |
|----------------------------------------------------|----------|----------|----------|----|
| Li <sub>2</sub> S <sub>8</sub> -Zr@VS <sub>2</sub> |          |          |          |    |
|                                                    | 1        |          |          |    |
|                                                    | 12.884   | 0        | 0        |    |
|                                                    | -6.442   | 11.15787 | 0        |    |
|                                                    | 0        | 0        | 17.8775  |    |
|                                                    | V        | S        | Zr       | Li |
|                                                    | 16       | 40       | 1        | 2  |
| Direct                                             |          |          |          |    |
|                                                    | 0.200599 | 0.224131 | 0.359925 |    |
|                                                    | 0.479583 | 0.227776 | 0.362803 |    |
|                                                    | 0.732443 | 0.245659 | 0.361314 |    |
|                                                    | 0.944337 | 0.205824 | 0.354963 |    |
|                                                    | 0.234926 | 0.4707   | 0.353604 |    |
|                                                    | 0.457229 | 0.458653 | 0.356849 |    |
|                                                    | 0.697221 | 0.471212 | 0.359694 |    |
|                                                    | 0.956206 | 0.502771 | 0.363916 |    |
|                                                    | 0.191771 | 0.73656  | 0.36366  |    |
|                                                    | 0.497868 | 0.758353 | 0.359886 |    |
|                                                    | 0.739634 | 0.751187 | 0.36285  |    |
|                                                    | 0.961111 | 0.731183 | 0.363227 |    |
|                                                    | 0.230921 | 0.000289 | 0.362983 |    |
|                                                    | 0.448516 | 0.974959 | 0.361663 |    |
|                                                    | 0.703793 | 0.991543 | 0.356408 |    |
|                                                    | 0.98368  | 0.978179 | 0.360686 |    |
|                                                    | 0.041623 | 0.142742 | 0.440878 |    |
|                                                    | 0.137707 | 0.066813 | 0.275386 |    |
|                                                    | 0.301052 | 0.152182 | 0.443665 |    |
|                                                    | 0.384519 | 0.066445 | 0.277257 |    |
|                                                    | 0.552234 | 0.147591 | 0.443435 |    |
|                                                    | 0.628992 | 0.072044 | 0.279271 |    |
|                                                    | 0.796359 | 0.148357 | 0.443395 |    |
|                                                    | 0.877208 | 0.059707 | 0.275397 |    |
|                                                    | 0.046763 | 0.39795  | 0.431629 |    |
|                                                    | 0.125768 | 0.310494 | 0.278253 |    |
|                                                    | 0.298264 | 0.393737 | 0.443515 |    |
|                                                    | 0.380906 | 0.306649 | 0.278853 |    |
|                                                    | 0.545894 | 0.394344 | 0.4452   |    |
|                                                    | 0.635355 | 0.314776 | 0.277887 |    |
|                                                    | 0.794504 | 0.401601 | 0.44505  |    |
|                                                    | 0.890096 | 0.325484 | 0.282408 |    |
|                                                    | 0.033807 | 0.658773 | 0.452098 |    |
|                                                    | 0.131277 | 0.566469 | 0.290473 |    |
|                                                    | 0.306764 | 0.654659 | 0.426954 |    |

|  |          |          |          |  |
|--|----------|----------|----------|--|
|  | 0.390387 | 0.566924 | 0.278444 |  |
|  | 0.551535 | 0.651765 | 0.434178 |  |
|  | 0.630366 | 0.566677 | 0.282448 |  |
|  | 0.791263 | 0.650103 | 0.442746 |  |
|  | 0.876458 | 0.569439 | 0.27843  |  |
|  | 0.053959 | 0.904722 | 0.445122 |  |
|  | 0.128732 | 0.819887 | 0.280245 |  |
|  | 0.296992 | 0.902165 | 0.446894 |  |
|  | 0.375259 | 0.810701 | 0.285643 |  |
|  | 0.55244  | 0.906178 | 0.444294 |  |
|  | 0.640792 | 0.824869 | 0.274582 |  |
|  | 0.804846 | 0.90656  | 0.43853  |  |
|  | 0.8874   | 0.819554 | 0.275524 |  |
|  | 0.047315 | 0.497972 | 0.708669 |  |
|  | 0.115508 | 0.213457 | 0.667367 |  |
|  | 0.146103 | 0.661715 | 0.653572 |  |
|  | -0.02581 | 0.379113 | 0.621048 |  |
|  | 0.419014 | 0.392473 | 0.659848 |  |
|  | 0.269088 | 0.32947  | 0.726676 |  |
|  | 0.303222 | 0.677209 | 0.613094 |  |
|  | 0.09262  | 0.315316 | 0.587129 |  |
|  | 0.140441 | 0.572643 | 0.51095  |  |
|  | 0.382597 | 0.307892 | 0.537212 |  |
|  | 0.325332 | 0.503822 | 0.639878 |  |

|                                    |          |          |          |
|------------------------------------|----------|----------|----------|
| S <sub>8</sub> -Zr@VS <sub>2</sub> |          |          |          |
|                                    | 1        |          |          |
|                                    | 12.884   | 0        | 0        |
|                                    | -6.442   | 11.15787 | 0        |
|                                    | 0        | 0        | 17.8775  |
|                                    | V        | S        | Zr       |
|                                    | 16       | 40       | 1        |
| Direct                             |          |          |          |
|                                    | 0.223826 | 0.213904 | 0.352079 |
|                                    | 0.467519 | 0.212397 | 0.355606 |
|                                    | 0.720552 | 0.233576 | 0.354431 |
|                                    | 0.936402 | 0.185421 | 0.347872 |
|                                    | 0.230431 | 0.447768 | 0.347642 |
|                                    | 0.464586 | 0.454862 | 0.352616 |
|                                    | 0.696112 | 0.452607 | 0.356695 |
|                                    | 0.958778 | 0.487397 | 0.359594 |
|                                    | 0.191568 | 0.720732 | 0.359585 |
|                                    | 0.492591 | 0.741944 | 0.349232 |
|                                    | 0.721071 | 0.702046 | 0.356038 |
|                                    | 0.963092 | 0.713869 | 0.357537 |
|                                    | 0.226896 | 0.983679 | 0.355968 |
|                                    | 0.44528  | 0.958797 | 0.354564 |
|                                    | 0.699416 | 0.978963 | 0.348549 |
|                                    | 0.977094 | 0.957616 | 0.355577 |
|                                    | 0.043131 | 0.130182 | 0.429212 |
|                                    | 0.133742 | 0.048498 | 0.269821 |
|                                    | 0.300611 | 0.136032 | 0.439591 |
|                                    | 0.37928  | 0.048799 | 0.270417 |
|                                    | 0.547845 | 0.131578 | 0.434281 |
|                                    | 0.623056 | 0.055572 | 0.270043 |
|                                    | 0.79126  | 0.130127 | 0.435527 |
|                                    | 0.871322 | 0.040697 | 0.267277 |
|                                    | 0.041547 | 0.370738 | 0.424664 |
|                                    | 0.126555 | 0.290902 | 0.27314  |
|                                    | 0.300942 | 0.376259 | 0.436589 |
|                                    | 0.383424 | 0.296059 | 0.269878 |
|                                    | 0.543017 | 0.378217 | 0.439918 |
|                                    | 0.630644 | 0.300382 | 0.270674 |
|                                    | 0.791817 | 0.383271 | 0.441439 |
|                                    | 0.886102 | 0.308866 | 0.278405 |
|                                    | 0.034667 | 0.644778 | 0.447334 |
|                                    | 0.131065 | 0.548993 | 0.2865   |
|                                    | 0.30703  | 0.637845 | 0.428525 |

|  |          |          |          |
|--|----------|----------|----------|
|  | 0.388234 | 0.552926 | 0.274098 |
|  | 0.54823  | 0.634996 | 0.430058 |
|  | 0.630295 | 0.544961 | 0.270513 |
|  | 0.790333 | 0.62827  | 0.440409 |
|  | 0.8773   | 0.552145 | 0.274621 |
|  | 0.05108  | 0.888905 | 0.439806 |
|  | 0.12658  | 0.801548 | 0.274865 |
|  | 0.295155 | 0.887926 | 0.441168 |
|  | 0.370083 | 0.792587 | 0.27922  |
|  | 0.548793 | 0.888267 | 0.436205 |
|  | 0.636956 | 0.806306 | 0.26825  |
|  | 0.796093 | 0.882889 | 0.421788 |
|  | 0.881079 | 0.797044 | 0.271889 |
|  | 0.948879 | 0.351161 | 0.603527 |
|  | 0.082127 | 0.323753 | 0.647886 |
|  | 0.901768 | 0.440468 | 0.682898 |
|  | 0.241271 | 0.454332 | 0.598617 |
|  | 0.973654 | 0.611881 | 0.642362 |
|  | 0.328198 | 0.61369  | 0.660271 |
|  | 0.139352 | 0.724389 | 0.687395 |
|  | 0.266636 | 0.721659 | 0.614925 |
|  | 0.130385 | 0.543834 | 0.499589 |

|                                      |          |          |          |    |
|--------------------------------------|----------|----------|----------|----|
| Li <sub>2</sub> S-Hf@VS <sub>2</sub> |          |          |          |    |
|                                      | 1        |          |          |    |
|                                      | 12.884   | 0        | 0        |    |
|                                      | -6.442   | 11.15787 | 0        |    |
|                                      | 0        | 0        | 17.8775  |    |
|                                      | V        | S        | Hf       | Li |
|                                      | 16       | 33       | 1        | 2  |
| Direct                               |          |          |          |    |
|                                      | 0.214526 | 0.21274  | 0.368066 |    |
|                                      | 0.485748 | 0.210523 | 0.365601 |    |
|                                      | 0.721678 | 0.222797 | 0.366431 |    |
|                                      | 0.945301 | 0.215551 | 0.364714 |    |
|                                      | 0.224594 | 0.440711 | 0.360981 |    |
|                                      | 0.458256 | 0.436885 | 0.368649 |    |
|                                      | 0.710163 | 0.464302 | 0.366658 |    |
|                                      | 0.948087 | 0.461902 | 0.364882 |    |
|                                      | 0.182289 | 0.713424 | 0.354483 |    |
|                                      | 0.492647 | 0.752132 | 0.356494 |    |
|                                      | 0.748433 | 0.724092 | 0.362679 |    |
|                                      | 0.958265 | 0.698421 | 0.360684 |    |
|                                      | 0.204188 | 0.977976 | 0.368314 |    |
|                                      | 0.492859 | 0.98191  | 0.365063 |    |
|                                      | 0.727673 | 0.971113 | 0.365396 |    |
|                                      | 0.972375 | 0.986752 | 0.365633 |    |
|                                      | 0.045183 | 0.135436 | 0.448432 |    |
|                                      | 0.132947 | 0.052435 | 0.280343 |    |
|                                      | 0.300471 | 0.127361 | 0.44828  |    |
|                                      | 0.38529  | 0.046401 | 0.289187 |    |
|                                      | 0.556609 | 0.132057 | 0.452225 |    |
|                                      | 0.642247 | 0.056129 | 0.281974 |    |
|                                      | 0.798947 | 0.134492 | 0.450506 |    |
|                                      | 0.88707  | 0.056865 | 0.279866 |    |
|                                      | 0.050588 | 0.385431 | 0.440636 |    |
|                                      | 0.132304 | 0.291271 | 0.281433 |    |
|                                      | 0.295434 | 0.364626 | 0.455666 |    |
|                                      | 0.38498  | 0.29002  | 0.285306 |    |
|                                      | 0.551316 | 0.374347 | 0.451856 |    |
|                                      | 0.636127 | 0.300628 | 0.282587 |    |
|                                      | 0.797989 | 0.382443 | 0.450846 |    |
|                                      | 0.881082 | 0.303241 | 0.27954  |    |
|                                      | 0.043512 | 0.630359 | 0.447671 |    |
|                                      | 0.132939 | 0.540802 | 0.290374 |    |
|                                      | 0.299528 | 0.637984 | 0.42309  |    |

|  |          |          |          |  |
|--|----------|----------|----------|--|
|  | 0.392452 | 0.551589 | 0.292982 |  |
|  | 0.563088 | 0.639322 | 0.441004 |  |
|  | 0.628459 | 0.549256 | 0.290565 |  |
|  | 0.804496 | 0.63182  | 0.448701 |  |
|  | 0.873799 | 0.543286 | 0.278615 |  |
|  | 0.04507  | 0.881708 | 0.441901 |  |
|  | 0.122984 | 0.801341 | 0.275717 |  |
|  | 0.295926 | 0.877521 | 0.435537 |  |
|  | 0.382896 | 0.805185 | 0.28666  |  |
|  | 0.559387 | 0.88905  | 0.448966 |  |
|  | 0.64929  | 0.806461 | 0.281633 |  |
|  | 0.806961 | 0.885001 | 0.445837 |  |
|  | 0.891271 | 0.802993 | 0.279873 |  |
|  | 0.275863 | 0.56721  | 0.616847 |  |
|  | 0.378218 | 0.560668 | 0.509172 |  |
|  | 0.10769  | 0.394292 | 0.566731 |  |
|  | 0.229695 | 0.702049 | 0.531701 |  |

|                                                    |          |          |          |    |
|----------------------------------------------------|----------|----------|----------|----|
| Li <sub>2</sub> S <sub>2</sub> -Hf@VS <sub>2</sub> |          |          |          |    |
|                                                    | 1        |          |          |    |
|                                                    | 12.884   | 0        | 0        |    |
|                                                    | -6.442   | 11.15787 | 0        |    |
|                                                    | 0        | 0        | 17.8775  |    |
|                                                    | V        | S        | Hf       | Li |
|                                                    | 16       | 34       | 1        | 2  |
| Direct                                             |          |          |          |    |
|                                                    | 0.204857 | 0.182425 | 0.355365 |    |
|                                                    | 0.446875 | 0.185134 | 0.362295 |    |
|                                                    | 0.70349  | 0.215702 | 0.362192 |    |
|                                                    | 0.952286 | 0.209362 | 0.361805 |    |
|                                                    | 0.176136 | 0.452104 | 0.358181 |    |
|                                                    | 0.485362 | 0.496064 | 0.362558 |    |
|                                                    | 0.726427 | 0.459804 | 0.359698 |    |
|                                                    | 0.95151  | 0.444754 | 0.360121 |    |
|                                                    | 0.194232 | 0.731289 | 0.362981 |    |
|                                                    | 0.488007 | 0.736457 | 0.361594 |    |
|                                                    | 0.718259 | 0.712373 | 0.363156 |    |
|                                                    | 0.964534 | 0.739442 | 0.362124 |    |
|                                                    | 0.215086 | 0.962068 | 0.359772 |    |
|                                                    | 0.465491 | 0.959719 | 0.360905 |    |
|                                                    | 0.711204 | 0.987908 | 0.361812 |    |
|                                                    | 0.936743 | 0.964153 | 0.360343 |    |
|                                                    | 0.043446 | 0.130061 | 0.43963  |    |
|                                                    | 0.122265 | 0.039026 | 0.274694 |    |
|                                                    | 0.287354 | 0.119123 | 0.446028 |    |
|                                                    | 0.37534  | 0.04032  | 0.275403 |    |
|                                                    | 0.539806 | 0.126875 | 0.445834 |    |
|                                                    | 0.623079 | 0.051357 | 0.277242 |    |
|                                                    | 0.79254  | 0.136419 | 0.447015 |    |
|                                                    | 0.870303 | 0.051587 | 0.275429 |    |
|                                                    | 0.035258 | 0.375793 | 0.447542 |    |
|                                                    | 0.125408 | 0.291984 | 0.283557 |    |
|                                                    | 0.288623 | 0.374188 | 0.434135 |    |
|                                                    | 0.380445 | 0.30346  | 0.293496 |    |
|                                                    | 0.542685 | 0.378556 | 0.437898 |    |
|                                                    | 0.618879 | 0.29604  | 0.282965 |    |
|                                                    | 0.793947 | 0.378039 | 0.446382 |    |
|                                                    | 0.86902  | 0.293428 | 0.277596 |    |
|                                                    | 0.037641 | 0.632459 | 0.438312 |    |
|                                                    | 0.119477 | 0.547418 | 0.280009 |    |
|                                                    | 0.285414 | 0.637193 | 0.43917  |    |

|  |          |          |          |  |
|--|----------|----------|----------|--|
|  | 0.37344  | 0.550201 | 0.292775 |  |
|  | 0.564697 | 0.651615 | 0.450114 |  |
|  | 0.635072 | 0.553024 | 0.279624 |  |
|  | 0.802672 | 0.635164 | 0.443561 |  |
|  | 0.878999 | 0.547373 | 0.28163  |  |
|  | 0.041949 | 0.889866 | 0.441407 |  |
|  | 0.122314 | 0.79996  | 0.274203 |  |
|  | 0.290749 | 0.882196 | 0.445078 |  |
|  | 0.373628 | 0.791618 | 0.286254 |  |
|  | 0.549597 | 0.890266 | 0.44722  |  |
|  | 0.634112 | 0.806784 | 0.280552 |  |
|  | 0.793624 | 0.890361 | 0.443671 |  |
|  | 0.875576 | 0.80284  | 0.275693 |  |
|  | 0.453877 | 0.455533 | 0.612363 |  |
|  | 0.340101 | 0.521668 | 0.646004 |  |
|  | 0.37214  | 0.544587 | 0.512422 |  |
|  | 0.636165 | 0.536023 | 0.531381 |  |
|  | 0.365038 | 0.289257 | 0.527588 |  |

|                                                    |          |          |          |    |
|----------------------------------------------------|----------|----------|----------|----|
| Li <sub>2</sub> S <sub>4</sub> -Hf@VS <sub>2</sub> |          |          |          |    |
|                                                    | 1        |          |          |    |
|                                                    | 12.884   | 0        | 0        |    |
|                                                    | -6.442   | 11.15787 | 0        |    |
|                                                    | 0        | 0        | 17.8775  |    |
|                                                    | V        | S        | Hf       | Li |
|                                                    | 16       | 36       | 1        | 2  |
| Direct                                             |          |          |          |    |
|                                                    | 0.2057   | 0.212277 | 0.368941 |    |
|                                                    | 0.485594 | 0.214781 | 0.368665 |    |
|                                                    | 0.723849 | 0.227131 | 0.367692 |    |
|                                                    | 0.945036 | 0.20816  | 0.365535 |    |
|                                                    | 0.196828 | 0.434069 | 0.370962 |    |
|                                                    | 0.435625 | 0.434822 | 0.369641 |    |
|                                                    | 0.720362 | 0.458187 | 0.367758 |    |
|                                                    | 0.969338 | 0.465388 | 0.365788 |    |
|                                                    | 0.187    | 0.717762 | 0.359718 |    |
|                                                    | 0.477817 | 0.747356 | 0.361273 |    |
|                                                    | 0.742787 | 0.711071 | 0.358797 |    |
|                                                    | 0.953911 | 0.695454 | 0.360843 |    |
|                                                    | 0.231611 | 0.986896 | 0.36677  |    |
|                                                    | 0.454962 | 0.965153 | 0.367536 |    |
|                                                    | 0.704447 | 0.981971 | 0.365732 |    |
|                                                    | 0.990085 | 0.973826 | 0.367661 |    |
|                                                    | 0.039992 | 0.122959 | 0.44942  |    |
|                                                    | 0.136053 | 0.051338 | 0.280576 |    |
|                                                    | 0.303681 | 0.132119 | 0.449256 |    |
|                                                    | 0.386242 | 0.055775 | 0.281996 |    |
|                                                    | 0.551669 | 0.132702 | 0.451425 |    |
|                                                    | 0.628665 | 0.054467 | 0.283669 |    |
|                                                    | 0.793315 | 0.132438 | 0.452404 |    |
|                                                    | 0.875697 | 0.043468 | 0.28941  |    |
|                                                    | 0.038503 | 0.373999 | 0.451309 |    |
|                                                    | 0.122759 | 0.289266 | 0.283783 |    |
|                                                    | 0.281304 | 0.35721  | 0.45964  |    |
|                                                    | 0.376148 | 0.291386 | 0.286737 |    |
|                                                    | 0.548933 | 0.380319 | 0.448435 |    |
|                                                    | 0.635746 | 0.300544 | 0.282185 |    |
|                                                    | 0.800563 | 0.381872 | 0.451817 |    |
|                                                    | 0.880863 | 0.298658 | 0.282972 |    |
|                                                    | 0.042156 | 0.628765 | 0.448576 |    |
|                                                    | 0.134661 | 0.54392  | 0.288789 |    |
|                                                    | 0.287178 | 0.631165 | 0.433499 |    |

|  |          |          |          |  |
|--|----------|----------|----------|--|
|  | 0.380179 | 0.548599 | 0.300243 |  |
|  | 0.547887 | 0.636088 | 0.44502  |  |
|  | 0.619585 | 0.540571 | 0.295042 |  |
|  | 0.803556 | 0.627453 | 0.44904  |  |
|  | 0.878995 | 0.539534 | 0.280108 |  |
|  | 0.051454 | 0.879246 | 0.44288  |  |
|  | 0.124597 | 0.800118 | 0.279086 |  |
|  | 0.289799 | 0.879413 | 0.445971 |  |
|  | 0.373778 | 0.800903 | 0.284763 |  |
|  | 0.545624 | 0.889887 | 0.451375 |  |
|  | 0.636897 | 0.801675 | 0.289849 |  |
|  | 0.799305 | 0.880737 | 0.435544 |  |
|  | 0.888783 | 0.797444 | 0.2784   |  |
|  | 0.36073  | 0.685787 | 0.621002 |  |
|  | 0.347921 | 0.532437 | 0.664773 |  |
|  | 0.651202 | 0.718098 | 0.648222 |  |
|  | 0.517969 | 0.548132 | 0.629448 |  |
|  | 0.369097 | 0.549934 | 0.51917  |  |
|  | 0.740116 | 0.731237 | 0.527933 |  |
|  | 0.572254 | 0.824133 | 0.572919 |  |

|                                                    |          |          |          |    |
|----------------------------------------------------|----------|----------|----------|----|
| Li <sub>2</sub> S <sub>6</sub> -Hf@VS <sub>2</sub> |          |          |          |    |
|                                                    | 1        |          |          |    |
|                                                    | 12.884   | 0        | 0        |    |
|                                                    | -6.442   | 11.15787 | 0        |    |
|                                                    | 0        | 0        | 17.8775  |    |
|                                                    | V        | S        | Hf       | Li |
|                                                    | 16       | 38       | 1        | 2  |
| Direct                                             |          |          |          |    |
|                                                    | 0.20292  | 0.217139 | 0.362283 |    |
|                                                    | 0.479824 | 0.219439 | 0.360621 |    |
|                                                    | 0.716589 | 0.228962 | 0.359781 |    |
|                                                    | 0.941551 | 0.214218 | 0.358705 |    |
|                                                    | 0.192388 | 0.438917 | 0.365125 |    |
|                                                    | 0.436522 | 0.43955  | 0.363224 |    |
|                                                    | 0.711024 | 0.46082  | 0.358611 |    |
|                                                    | 0.960815 | 0.467628 | 0.359381 |    |
|                                                    | 0.182913 | 0.723856 | 0.354784 |    |
|                                                    | 0.474176 | 0.751917 | 0.355908 |    |
|                                                    | 0.739974 | 0.718476 | 0.353419 |    |
|                                                    | 0.948868 | 0.699175 | 0.353448 |    |
|                                                    | 0.228624 | 0.992478 | 0.359369 |    |
|                                                    | 0.456159 | 0.975013 | 0.359488 |    |
|                                                    | 0.700662 | 0.986171 | 0.359213 |    |
|                                                    | 0.986264 | 0.978574 | 0.36051  |    |
|                                                    | 0.036698 | 0.128725 | 0.4421   |    |
|                                                    | 0.132488 | 0.056833 | 0.273362 |    |
|                                                    | 0.299827 | 0.137507 | 0.442283 |    |
|                                                    | 0.382141 | 0.059827 | 0.273925 |    |
|                                                    | 0.547081 | 0.137011 | 0.444201 |    |
|                                                    | 0.625577 | 0.059028 | 0.275389 |    |
|                                                    | 0.78868  | 0.137609 | 0.444938 |    |
|                                                    | 0.872505 | 0.049047 | 0.282495 |    |
|                                                    | 0.033803 | 0.378661 | 0.444902 |    |
|                                                    | 0.119384 | 0.295388 | 0.277624 |    |
|                                                    | 0.279553 | 0.364346 | 0.452847 |    |
|                                                    | 0.372465 | 0.29662  | 0.279183 |    |
|                                                    | 0.545681 | 0.383362 | 0.442392 |    |
|                                                    | 0.629701 | 0.303782 | 0.273767 |    |
|                                                    | 0.794189 | 0.386603 | 0.443431 |    |
|                                                    | 0.876424 | 0.303634 | 0.275834 |    |
|                                                    | 0.036158 | 0.633949 | 0.442043 |    |
|                                                    | 0.131027 | 0.549702 | 0.284828 |    |
|                                                    | 0.281366 | 0.63789  | 0.433741 |    |

|  |          |          |          |  |
|--|----------|----------|----------|--|
|  | 0.375671 | 0.553378 | 0.296114 |  |
|  | 0.552533 | 0.638512 | 0.436319 |  |
|  | 0.617036 | 0.547183 | 0.286059 |  |
|  | 0.798528 | 0.632046 | 0.441106 |  |
|  | 0.874286 | 0.543815 | 0.272608 |  |
|  | 0.04819  | 0.884257 | 0.435229 |  |
|  | 0.121217 | 0.804606 | 0.272627 |  |
|  | 0.288416 | 0.886475 | 0.43846  |  |
|  | 0.369801 | 0.803974 | 0.279962 |  |
|  | 0.542987 | 0.894881 | 0.444328 |  |
|  | 0.631307 | 0.806101 | 0.283062 |  |
|  | 0.797058 | 0.88738  | 0.428492 |  |
|  | 0.884623 | 0.802171 | 0.271046 |  |
|  | 0.630318 | 0.807976 | 0.627694 |  |
|  | 0.447322 | 0.722469 | 0.614887 |  |
|  | 0.591047 | 0.484829 | 0.700412 |  |
|  | 0.359166 | 0.541556 | 0.645666 |  |
|  | 0.844867 | 0.714537 | 0.640153 |  |
|  | 0.72604  | 0.538692 | 0.629057 |  |
|  | 0.376415 | 0.561705 | 0.509233 |  |
|  | 0.676704 | 0.698327 | 0.71252  |  |
|  | 0.727976 | 0.747638 | 0.532242 |  |

|                                                    |          |          |          |    |
|----------------------------------------------------|----------|----------|----------|----|
| Li <sub>2</sub> S <sub>8</sub> -Hf@VS <sub>2</sub> |          |          |          |    |
|                                                    | 1        |          |          |    |
|                                                    | 12.884   | 0        | 0        |    |
|                                                    | -6.442   | 11.15787 | 0        |    |
|                                                    | 0        | 0        | 17.8775  |    |
|                                                    | V        | S        | Hf       | Li |
|                                                    | 16       | 40       | 1        | 2  |
| Direct                                             |          |          |          |    |
|                                                    | 0.200301 | 0.212975 | 0.362907 |    |
|                                                    | 0.478715 | 0.217136 | 0.361213 |    |
|                                                    | 0.714905 | 0.226603 | 0.361166 |    |
|                                                    | 0.937666 | 0.210021 | 0.360008 |    |
|                                                    | 0.188359 | 0.435971 | 0.364719 |    |
|                                                    | 0.432556 | 0.437382 | 0.361941 |    |
|                                                    | 0.71383  | 0.459068 | 0.36087  |    |
|                                                    | 0.961643 | 0.464977 | 0.360958 |    |
|                                                    | 0.181699 | 0.721002 | 0.354931 |    |
|                                                    | 0.470667 | 0.75077  | 0.357004 |    |
|                                                    | 0.737705 | 0.712677 | 0.354377 |    |
|                                                    | 0.947137 | 0.696108 | 0.354549 |    |
|                                                    | 0.226043 | 0.989783 | 0.359438 |    |
|                                                    | 0.453098 | 0.972915 | 0.361228 |    |
|                                                    | 0.698319 | 0.983326 | 0.360482 |    |
|                                                    | 0.984524 | 0.975798 | 0.360888 |    |
|                                                    | 0.034067 | 0.124567 | 0.442852 |    |
|                                                    | 0.129578 | 0.053455 | 0.273456 |    |
|                                                    | 0.297541 | 0.134912 | 0.442459 |    |
|                                                    | 0.380594 | 0.058701 | 0.274669 |    |
|                                                    | 0.544905 | 0.1363   | 0.445523 |    |
|                                                    | 0.623097 | 0.056422 | 0.27721  |    |
|                                                    | 0.786657 | 0.134588 | 0.446524 |    |
|                                                    | 0.869441 | 0.046466 | 0.283049 |    |
|                                                    | 0.03213  | 0.375138 | 0.446378 |    |
|                                                    | 0.116381 | 0.291811 | 0.278668 |    |
|                                                    | 0.275329 | 0.359518 | 0.452955 |    |
|                                                    | 0.369348 | 0.293752 | 0.279727 |    |
|                                                    | 0.543117 | 0.3829   | 0.441711 |    |
|                                                    | 0.629891 | 0.3028   | 0.275215 |    |
|                                                    | 0.793462 | 0.384041 | 0.445484 |    |
|                                                    | 0.874639 | 0.300689 | 0.277232 |    |
|                                                    | 0.034381 | 0.631229 | 0.442779 |    |
|                                                    | 0.130536 | 0.547599 | 0.285487 |    |
|                                                    | 0.280493 | 0.640283 | 0.439984 |    |

|  |          |          |          |  |
|--|----------|----------|----------|--|
|  | 0.37472  | 0.553879 | 0.298283 |  |
|  | 0.556489 | 0.644219 | 0.444484 |  |
|  | 0.614542 | 0.543308 | 0.288317 |  |
|  | 0.797549 | 0.630998 | 0.443387 |  |
|  | 0.873838 | 0.540954 | 0.27383  |  |
|  | 0.046455 | 0.881797 | 0.435808 |  |
|  | 0.119107 | 0.801563 | 0.273568 |  |
|  | 0.284494 | 0.884279 | 0.439229 |  |
|  | 0.367897 | 0.803706 | 0.280464 |  |
|  | 0.537268 | 0.893353 | 0.446034 |  |
|  | 0.628641 | 0.802621 | 0.285798 |  |
|  | 0.796727 | 0.883147 | 0.427766 |  |
|  | 0.882118 | 0.798167 | 0.272171 |  |
|  | 0.843775 | 0.799054 | 0.651692 |  |
|  | 0.533118 | 0.502998 | 0.765222 |  |
|  | 0.868323 | 0.967655 | 0.64786  |  |
|  | 0.823859 | 0.741237 | 0.763642 |  |
|  | 0.404684 | 0.593441 | 0.642606 |  |
|  | 0.508853 | 0.507522 | 0.653677 |  |
|  | 0.702375 | 0.956216 | 0.637747 |  |
|  | 0.649898 | 0.682084 | 0.797475 |  |
|  | 0.373359 | 0.555035 | 0.504888 |  |
|  | 0.581413 | 0.777522 | 0.699652 |  |
|  | 0.664601 | 0.84938  | 0.52552  |  |

|                                    |          |          |          |
|------------------------------------|----------|----------|----------|
| S <sub>8</sub> -Hf@VS <sub>2</sub> |          |          |          |
|                                    | 1        |          |          |
|                                    | 12.884   | 0        | 0        |
|                                    | -6.442   | 11.15787 | 0        |
|                                    | 0        | 0        | 17.8775  |
|                                    | V        | S        | Hf       |
|                                    | 16       | 40       | 1        |
| Direct                             |          |          |          |
|                                    | 0.214955 | 0.210868 | 0.366269 |
|                                    | 0.479011 | 0.208117 | 0.363674 |
|                                    | 0.717738 | 0.218937 | 0.363495 |
|                                    | 0.947244 | 0.207323 | 0.364084 |
|                                    | 0.208811 | 0.43392  | 0.366925 |
|                                    | 0.444134 | 0.433617 | 0.365491 |
|                                    | 0.699342 | 0.45047  | 0.360787 |
|                                    | 0.972105 | 0.450521 | 0.362146 |
|                                    | 0.191047 | 0.715351 | 0.35771  |
|                                    | 0.479797 | 0.745407 | 0.354687 |
|                                    | 0.744514 | 0.71242  | 0.353422 |
|                                    | 0.953376 | 0.684417 | 0.354857 |
|                                    | 0.228741 | 0.982827 | 0.363656 |
|                                    | 0.472346 | 0.973111 | 0.360217 |
|                                    | 0.714969 | 0.97557  | 0.35994  |
|                                    | 0.9752   | 0.982375 | 0.363419 |
|                                    | 0.042343 | 0.125421 | 0.447936 |
|                                    | 0.133691 | 0.047787 | 0.279381 |
|                                    | 0.30308  | 0.126409 | 0.447944 |
|                                    | 0.384962 | 0.049676 | 0.277757 |
|                                    | 0.55198  | 0.12869  | 0.447504 |
|                                    | 0.633623 | 0.051538 | 0.277799 |
|                                    | 0.794241 | 0.128339 | 0.447745 |
|                                    | 0.881385 | 0.048436 | 0.278733 |
|                                    | 0.043572 | 0.371648 | 0.448852 |
|                                    | 0.128433 | 0.287705 | 0.282773 |
|                                    | 0.287059 | 0.35507  | 0.455854 |
|                                    | 0.377033 | 0.287368 | 0.2821   |
|                                    | 0.548303 | 0.372956 | 0.447218 |
|                                    | 0.630816 | 0.2938   | 0.277349 |
|                                    | 0.799508 | 0.380711 | 0.442143 |
|                                    | 0.881913 | 0.293965 | 0.278686 |
|                                    | 0.042773 | 0.624943 | 0.443348 |
|                                    | 0.138931 | 0.541471 | 0.287294 |
|                                    | 0.294034 | 0.634386 | 0.439204 |

|  |          |          |          |
|--|----------|----------|----------|
|  | 0.381403 | 0.545676 | 0.29409  |
|  | 0.561862 | 0.636137 | 0.435739 |
|  | 0.620797 | 0.540215 | 0.284883 |
|  | 0.801403 | 0.624038 | 0.441005 |
|  | 0.876762 | 0.531086 | 0.27646  |
|  | 0.047447 | 0.87616  | 0.429988 |
|  | 0.126453 | 0.794624 | 0.276005 |
|  | 0.295659 | 0.878267 | 0.438727 |
|  | 0.37759  | 0.799402 | 0.280262 |
|  | 0.550995 | 0.887162 | 0.443728 |
|  | 0.638608 | 0.798817 | 0.281826 |
|  | 0.799452 | 0.875834 | 0.434588 |
|  | 0.89068  | 0.794269 | 0.274188 |
|  | 0.379089 | 0.47258  | 0.68283  |
|  | 0.758392 | 0.830443 | 0.670894 |
|  | 0.480586 | 0.785791 | 0.68451  |
|  | 0.354472 | 0.611289 | 0.642749 |
|  | 0.488498 | 0.449342 | 0.605022 |
|  | 0.66842  | 0.539968 | 0.642474 |
|  | 0.763416 | 0.70747  | 0.598228 |
|  | 0.633485 | 0.866982 | 0.623598 |
|  | 0.389912 | 0.550247 | 0.50606  |

|                                      |          |          |          |    |
|--------------------------------------|----------|----------|----------|----|
| Li <sub>2</sub> S-Rh@VS <sub>2</sub> |          |          |          |    |
|                                      | 1        |          |          |    |
|                                      | 12.884   | 0        | 0        |    |
|                                      | -6.442   | 11.15787 | 0        |    |
|                                      | 0        | 0        | 17.8775  |    |
|                                      | V        | S        | Rh       | Li |
|                                      | 16       | 33       | 1        | 2  |
| Direct                               |          |          |          |    |
|                                      | 0.208785 | 0.191939 | 0.359167 |    |
|                                      | 0.461949 | 0.224462 | 0.362557 |    |
|                                      | 0.700283 | 0.22598  | 0.363013 |    |
|                                      | 0.960986 | 0.187423 | 0.348605 |    |
|                                      | 0.199449 | 0.484209 | 0.378397 |    |
|                                      | 0.489173 | 0.472696 | 0.358077 |    |
|                                      | 0.713286 | 0.464304 | 0.361202 |    |
|                                      | 0.942619 | 0.473819 | 0.369324 |    |
|                                      | 0.205658 | 0.730465 | 0.373685 |    |
|                                      | 0.484866 | 0.712458 | 0.350748 |    |
|                                      | 0.731268 | 0.715647 | 0.360665 |    |
|                                      | 0.962111 | 0.722205 | 0.362613 |    |
|                                      | 0.221487 | 0.967484 | 0.362389 |    |
|                                      | 0.461451 | 0.98565  | 0.36428  |    |
|                                      | 0.694709 | 0.975317 | 0.360354 |    |
|                                      | 0.967998 | 0.949439 | 0.360917 |    |
|                                      | 0.040835 | 0.122846 | 0.439943 |    |
|                                      | 0.130919 | 0.04323  | 0.275405 |    |
|                                      | 0.295893 | 0.133602 | 0.445818 |    |
|                                      | 0.379341 | 0.055052 | 0.27954  |    |
|                                      | 0.545203 | 0.139573 | 0.448573 |    |
|                                      | 0.623296 | 0.058105 | 0.277812 |    |
|                                      | 0.800043 | 0.136276 | 0.435583 |    |
|                                      | 0.875633 | 0.038413 | 0.2737   |    |
|                                      | 0.026285 | 0.374163 | 0.446797 |    |
|                                      | 0.132638 | 0.310717 | 0.290668 |    |
|                                      | 0.296692 | 0.38425  | 0.430784 |    |
|                                      | 0.377029 | 0.303509 | 0.281343 |    |
|                                      | 0.548844 | 0.387274 | 0.445661 |    |
|                                      | 0.626982 | 0.304147 | 0.278186 |    |
|                                      | 0.786039 | 0.383074 | 0.4506   |    |
|                                      | 0.881237 | 0.302829 | 0.292315 |    |
|                                      | 0.035122 | 0.635869 | 0.457492 |    |
|                                      | 0.124832 | 0.556068 | 0.292646 |    |
|                                      | 0.320988 | 0.663432 | 0.443078 |    |

|  |          |          |          |  |
|--|----------|----------|----------|--|
|  | 0.374237 | 0.549022 | 0.285499 |  |
|  | 0.555842 | 0.637475 | 0.441063 |  |
|  | 0.636952 | 0.552174 | 0.274028 |  |
|  | 0.799116 | 0.634556 | 0.445358 |  |
|  | 0.879178 | 0.550783 | 0.279131 |  |
|  | 0.04778  | 0.881751 | 0.445982 |  |
|  | 0.133484 | 0.800308 | 0.28199  |  |
|  | 0.299021 | 0.893518 | 0.451547 |  |
|  | 0.377642 | 0.800871 | 0.294453 |  |
|  | 0.547257 | 0.887453 | 0.440429 |  |
|  | 0.640276 | 0.808391 | 0.2765   |  |
|  | 0.795997 | 0.88453  | 0.433583 |  |
|  | 0.884909 | 0.795511 | 0.273674 |  |
|  | 0.195678 | 0.465878 | 0.600086 |  |
|  | 0.148315 | 0.548482 | 0.504722 |  |
|  | 0.139293 | 0.289958 | 0.529575 |  |
|  | 0.376032 | 0.529745 | 0.531414 |  |

|                                                    |          |          |          |    |
|----------------------------------------------------|----------|----------|----------|----|
| Li <sub>2</sub> S <sub>2</sub> -Rh@VS <sub>2</sub> |          |          |          |    |
|                                                    | 1        |          |          |    |
|                                                    | 12.884   | 0        | 0        |    |
|                                                    | -6.442   | 11.15787 | 0        |    |
|                                                    | 0        | 0        | 17.8775  |    |
|                                                    | V        | S        | Rh       | Li |
|                                                    | 16       | 34       | 1        | 2  |
| Direct                                             |          |          |          |    |
|                                                    | 0.209824 | 0.209334 | 0.363119 |    |
|                                                    | 0.474183 | 0.213996 | 0.364717 |    |
|                                                    | 0.710257 | 0.207657 | 0.360981 |    |
|                                                    | 0.938387 | 0.191132 | 0.350939 |    |
|                                                    | 0.223108 | 0.452921 | 0.367869 |    |
|                                                    | 0.452786 | 0.443317 | 0.363054 |    |
|                                                    | 0.697366 | 0.457863 | 0.362633 |    |
|                                                    | 0.949024 | 0.473087 | 0.373752 |    |
|                                                    | 0.199062 | 0.724664 | 0.371619 |    |
|                                                    | 0.48914  | 0.743912 | 0.350813 |    |
|                                                    | 0.73239  | 0.736172 | 0.361578 |    |
|                                                    | 0.950057 | 0.711469 | 0.362752 |    |
|                                                    | 0.231899 | 0.985003 | 0.364409 |    |
|                                                    | 0.465828 | 0.972217 | 0.361793 |    |
|                                                    | 0.705582 | 0.970697 | 0.356041 |    |
|                                                    | 0.980794 | 0.964294 | 0.36147  |    |
|                                                    | 0.038805 | 0.128549 | 0.440151 |    |
|                                                    | 0.136683 | 0.049505 | 0.277656 |    |
|                                                    | 0.300453 | 0.135507 | 0.447381 |    |
|                                                    | 0.384209 | 0.052991 | 0.279103 |    |
|                                                    | 0.549531 | 0.132381 | 0.446877 |    |
|                                                    | 0.626543 | 0.052532 | 0.275106 |    |
|                                                    | 0.792504 | 0.128333 | 0.442292 |    |
|                                                    | 0.876178 | 0.042192 | 0.273503 |    |
|                                                    | 0.03031  | 0.364775 | 0.445283 |    |
|                                                    | 0.127273 | 0.296952 | 0.28459  |    |
|                                                    | 0.296988 | 0.372737 | 0.450694 |    |
|                                                    | 0.379701 | 0.294011 | 0.280366 |    |
|                                                    | 0.544391 | 0.379616 | 0.448583 |    |
|                                                    | 0.63059  | 0.299556 | 0.280443 |    |
|                                                    | 0.787446 | 0.3799   | 0.448619 |    |
|                                                    | 0.882176 | 0.308515 | 0.285244 |    |
|                                                    | 0.031003 | 0.645827 | 0.454822 |    |
|                                                    | 0.129009 | 0.547323 | 0.3034   |    |
|                                                    | 0.312036 | 0.642609 | 0.445583 |    |

|  |          |          |          |  |
|--|----------|----------|----------|--|
|  | 0.37982  | 0.547684 | 0.287317 |  |
|  | 0.547688 | 0.638677 | 0.432271 |  |
|  | 0.624709 | 0.548093 | 0.285457 |  |
|  | 0.787739 | 0.635329 | 0.443557 |  |
|  | 0.876154 | 0.547316 | 0.283813 |  |
|  | 0.05052  | 0.888321 | 0.444315 |  |
|  | 0.128827 | 0.800015 | 0.286049 |  |
|  | 0.299523 | 0.890015 | 0.448092 |  |
|  | 0.368969 | 0.796298 | 0.28603  |  |
|  | 0.550951 | 0.886554 | 0.441877 |  |
|  | 0.639456 | 0.806544 | 0.271373 |  |
|  | 0.801308 | 0.890791 | 0.438811 |  |
|  | 0.884474 | 0.80178  | 0.275961 |  |
|  | 0.253319 | 0.439395 | 0.634839 |  |
|  | 0.158022 | 0.521839 | 0.6135   |  |
|  | 0.126075 | 0.54905  | 0.496026 |  |
|  | 0.399137 | 0.557599 | 0.533934 |  |
|  | 0.125232 | 0.292185 | 0.538085 |  |

|                                                    |          |          |          |    |
|----------------------------------------------------|----------|----------|----------|----|
| Li <sub>2</sub> S <sub>4</sub> -Rh@VS <sub>2</sub> |          |          |          |    |
|                                                    | 1        |          |          |    |
|                                                    | 12.884   | 0        | 0        |    |
|                                                    | -6.442   | 11.15787 | 0        |    |
|                                                    | 0        | 0        | 17.8775  |    |
|                                                    | V        | S        | Rh       | Li |
|                                                    | 16       | 36       | 1        | 2  |
| Direct                                             |          |          |          |    |
|                                                    | 0.20351  | 0.201745 | 0.365347 |    |
|                                                    | 0.462759 | 0.207571 | 0.36692  |    |
|                                                    | 0.693087 | 0.192527 | 0.364036 |    |
|                                                    | 0.933568 | 0.188661 | 0.355996 |    |
|                                                    | 0.189864 | 0.435838 | 0.377835 |    |
|                                                    | 0.440083 | 0.439267 | 0.363675 |    |
|                                                    | 0.695957 | 0.442263 | 0.366667 |    |
|                                                    | 0.967008 | 0.471434 | 0.37634  |    |
|                                                    | 0.199507 | 0.72235  | 0.372945 |    |
|                                                    | 0.487871 | 0.739648 | 0.351387 |    |
|                                                    | 0.729906 | 0.733152 | 0.36161  |    |
|                                                    | 0.947058 | 0.699451 | 0.364178 |    |
|                                                    | 0.224822 | 0.978329 | 0.366754 |    |
|                                                    | 0.450192 | 0.958993 | 0.364581 |    |
|                                                    | 0.703553 | 0.968129 | 0.356961 |    |
|                                                    | 0.978326 | 0.959949 | 0.364473 |    |
|                                                    | 0.034811 | 0.123056 | 0.442539 |    |
|                                                    | 0.131769 | 0.043178 | 0.279545 |    |
|                                                    | 0.293438 | 0.130866 | 0.449829 |    |
|                                                    | 0.375963 | 0.043799 | 0.281434 |    |
|                                                    | 0.539255 | 0.123733 | 0.449322 |    |
|                                                    | 0.618305 | 0.043091 | 0.276523 |    |
|                                                    | 0.784213 | 0.12024  | 0.445559 |    |
|                                                    | 0.873221 | 0.040139 | 0.27669  |    |
|                                                    | 0.022386 | 0.355376 | 0.455547 |    |
|                                                    | 0.120043 | 0.291627 | 0.286652 |    |
|                                                    | 0.288133 | 0.36813  | 0.452232 |    |
|                                                    | 0.371793 | 0.287037 | 0.28244  |    |
|                                                    | 0.538341 | 0.374683 | 0.448779 |    |
|                                                    | 0.622538 | 0.28913  | 0.282077 |    |
|                                                    | 0.786009 | 0.370863 | 0.44729  |    |
|                                                    | 0.874051 | 0.300487 | 0.290657 |    |
|                                                    | 0.024804 | 0.639225 | 0.457227 |    |
|                                                    | 0.125788 | 0.542766 | 0.297968 |    |
|                                                    | 0.302181 | 0.628597 | 0.436122 |    |

|  |          |          |          |  |
|--|----------|----------|----------|--|
|  | 0.369866 | 0.541016 | 0.29389  |  |
|  | 0.543624 | 0.631884 | 0.432862 |  |
|  | 0.622108 | 0.541041 | 0.291851 |  |
|  | 0.782717 | 0.627484 | 0.443291 |  |
|  | 0.874285 | 0.538856 | 0.287485 |  |
|  | 0.045593 | 0.883175 | 0.446847 |  |
|  | 0.12417  | 0.793709 | 0.287471 |  |
|  | 0.293135 | 0.883206 | 0.452017 |  |
|  | 0.364475 | 0.789753 | 0.28604  |  |
|  | 0.546355 | 0.879631 | 0.441922 |  |
|  | 0.636582 | 0.801321 | 0.271091 |  |
|  | 0.797226 | 0.884235 | 0.441449 |  |
|  | 0.882341 | 0.796275 | 0.278134 |  |
|  | 0.449095 | 0.805581 | 0.632618 |  |
|  | 0.273042 | 0.733243 | 0.656003 |  |
|  | 0.301766 | 0.489484 | 0.630561 |  |
|  | 0.178641 | 0.541729 | 0.616989 |  |
|  | 0.124754 | 0.549532 | 0.494866 |  |
|  | 0.440688 | 0.653858 | 0.541464 |  |
|  | 0.383583 | 0.650425 | 0.719449 |  |

|                                                    |          |          |          |    |
|----------------------------------------------------|----------|----------|----------|----|
| Li <sub>2</sub> S <sub>6</sub> -Rh@VS <sub>2</sub> |          |          |          |    |
|                                                    | 1        |          |          |    |
|                                                    | 12.884   | 0        | 0        |    |
|                                                    | -6.442   | 11.15787 | 0        |    |
|                                                    | 0        | 0        | 17.8775  |    |
|                                                    | V        | S        | Rh       | Li |
|                                                    | 16       | 38       | 1        | 2  |
| Direct                                             |          |          |          |    |
|                                                    | 0.215183 | 0.212111 | 0.358642 |    |
|                                                    | 0.468593 | 0.223211 | 0.359941 |    |
|                                                    | 0.697923 | 0.207341 | 0.358749 |    |
|                                                    | 0.939782 | 0.196608 | 0.349069 |    |
|                                                    | 0.198241 | 0.446608 | 0.367942 |    |
|                                                    | 0.444307 | 0.45592  | 0.358078 |    |
|                                                    | 0.692933 | 0.461391 | 0.357871 |    |
|                                                    | 0.985219 | 0.480595 | 0.373838 |    |
|                                                    | 0.199904 | 0.731251 | 0.362919 |    |
|                                                    | 0.50221  | 0.734336 | 0.355095 |    |
|                                                    | 0.737607 | 0.740085 | 0.357703 |    |
|                                                    | 0.949664 | 0.706467 | 0.356032 |    |
|                                                    | 0.233414 | 0.988935 | 0.358416 |    |
|                                                    | 0.455686 | 0.965843 | 0.353699 |    |
|                                                    | 0.707056 | 0.973707 | 0.351612 |    |
|                                                    | 0.987825 | 0.970149 | 0.357357 |    |
|                                                    | 0.042413 | 0.132697 | 0.434909 |    |
|                                                    | 0.140211 | 0.055169 | 0.271984 |    |
|                                                    | 0.300017 | 0.139895 | 0.44376  |    |
|                                                    | 0.38553  | 0.057314 | 0.273483 |    |
|                                                    | 0.54385  | 0.133234 | 0.441055 |    |
|                                                    | 0.626936 | 0.052179 | 0.270678 |    |
|                                                    | 0.789797 | 0.128547 | 0.43809  |    |
|                                                    | 0.878079 | 0.048299 | 0.270355 |    |
|                                                    | 0.034727 | 0.364257 | 0.450314 |    |
|                                                    | 0.126199 | 0.299435 | 0.279339 |    |
|                                                    | 0.293146 | 0.378823 | 0.446182 |    |
|                                                    | 0.380053 | 0.301049 | 0.276463 |    |
|                                                    | 0.542402 | 0.384528 | 0.442988 |    |
|                                                    | 0.629492 | 0.301434 | 0.276083 |    |
|                                                    | 0.794952 | 0.382798 | 0.434798 |    |
|                                                    | 0.882814 | 0.312074 | 0.286161 |    |
|                                                    | 0.039313 | 0.65242  | 0.449608 |    |
|                                                    | 0.130538 | 0.552365 | 0.288051 |    |
|                                                    | 0.308627 | 0.642675 | 0.419236 |    |

|  |          |          |          |  |
|--|----------|----------|----------|--|
|  | 0.376221 | 0.549956 | 0.284248 |  |
|  | 0.555918 | 0.638506 | 0.43528  |  |
|  | 0.628173 | 0.552122 | 0.279887 |  |
|  | 0.791868 | 0.634578 | 0.439506 |  |
|  | 0.881575 | 0.546784 | 0.283443 |  |
|  | 0.054368 | 0.8928   | 0.439054 |  |
|  | 0.130587 | 0.805333 | 0.277505 |  |
|  | 0.298654 | 0.893005 | 0.441518 |  |
|  | 0.377862 | 0.79758  | 0.283079 |  |
|  | 0.550873 | 0.88708  | 0.436654 |  |
|  | 0.643945 | 0.806798 | 0.267851 |  |
|  | 0.806147 | 0.893873 | 0.434992 |  |
|  | 0.889279 | 0.805652 | 0.272358 |  |
|  | 0.201902 | 0.827827 | 0.619346 |  |
|  | 0.115676 | 0.663754 | 0.66838  |  |
|  | 0.33212  | 0.576594 | 0.659287 |  |
|  | 0.156872 | 0.543238 | 0.615269 |  |
|  | 0.519236 | 0.875885 | 0.651997 |  |
|  | 0.472503 | 0.711494 | 0.606029 |  |
|  | 0.139901 | 0.559818 | 0.487583 |  |
|  | 0.330674 | 0.814847 | 0.707061 |  |
|  | 0.392313 | 0.853258 | 0.549092 |  |

|                                                    |          |          |          |    |
|----------------------------------------------------|----------|----------|----------|----|
| Li <sub>2</sub> S <sub>8</sub> -Rh@VS <sub>2</sub> |          |          |          |    |
|                                                    | 1        |          |          |    |
|                                                    | 12.884   | 0        | 0        |    |
|                                                    | -6.442   | 11.15787 | 0        |    |
|                                                    | 0        | 0        | 17.8775  |    |
|                                                    | V        | S        | Rh       | Li |
|                                                    | 16       | 40       | 1        | 2  |
| Direct                                             |          |          |          |    |
|                                                    | 0.218133 | 0.213349 | 0.361019 |    |
|                                                    | 0.463537 | 0.215008 | 0.361483 |    |
|                                                    | 0.698418 | 0.202146 | 0.35974  |    |
|                                                    | 0.948903 | 0.197491 | 0.352056 |    |
|                                                    | 0.208877 | 0.450844 | 0.37053  |    |
|                                                    | 0.452895 | 0.457817 | 0.359464 |    |
|                                                    | 0.692773 | 0.450256 | 0.359821 |    |
|                                                    | 0.982756 | 0.475911 | 0.374671 |    |
|                                                    | 0.207341 | 0.720324 | 0.368764 |    |
|                                                    | 0.485019 | 0.735933 | 0.352512 |    |
|                                                    | 0.720111 | 0.733601 | 0.357838 |    |
|                                                    | 0.942734 | 0.707221 | 0.353692 |    |
|                                                    | 0.22867  | 0.982752 | 0.362015 |    |
|                                                    | 0.456129 | 0.965428 | 0.358729 |    |
|                                                    | 0.706735 | 0.972434 | 0.354854 |    |
|                                                    | 0.982917 | 0.969499 | 0.357975 |    |
|                                                    | 0.042741 | 0.128899 | 0.43842  |    |
|                                                    | 0.137014 | 0.051356 | 0.274984 |    |
|                                                    | 0.298196 | 0.135541 | 0.446769 |    |
|                                                    | 0.380039 | 0.050598 | 0.276244 |    |
|                                                    | 0.544961 | 0.131434 | 0.443582 |    |
|                                                    | 0.625713 | 0.050828 | 0.272739 |    |
|                                                    | 0.792101 | 0.128708 | 0.440144 |    |
|                                                    | 0.877831 | 0.046378 | 0.27321  |    |
|                                                    | 0.035357 | 0.360739 | 0.450029 |    |
|                                                    | 0.130632 | 0.300302 | 0.282184 |    |
|                                                    | 0.296003 | 0.375732 | 0.448038 |    |
|                                                    | 0.378182 | 0.296487 | 0.278225 |    |
|                                                    | 0.542252 | 0.379967 | 0.44442  |    |
|                                                    | 0.62507  | 0.294863 | 0.276586 |    |
|                                                    | 0.794716 | 0.381211 | 0.437079 |    |
|                                                    | 0.883851 | 0.30817  | 0.288012 |    |
|                                                    | 0.035613 | 0.648396 | 0.448089 |    |
|                                                    | 0.135541 | 0.550797 | 0.290621 |    |
|                                                    | 0.318793 | 0.639849 | 0.445065 |    |

|  |          |          |          |  |
|--|----------|----------|----------|--|
|  | 0.375114 | 0.547444 | 0.284482 |  |
|  | 0.549096 | 0.637278 | 0.435125 |  |
|  | 0.625791 | 0.546885 | 0.281491 |  |
|  | 0.788249 | 0.632385 | 0.437796 |  |
|  | 0.880468 | 0.543218 | 0.284121 |  |
|  | 0.047751 | 0.886323 | 0.439006 |  |
|  | 0.130822 | 0.799397 | 0.285501 |  |
|  | 0.299916 | 0.890438 | 0.445382 |  |
|  | 0.37383  | 0.797656 | 0.281126 |  |
|  | 0.549122 | 0.88629  | 0.439325 |  |
|  | 0.635839 | 0.805699 | 0.270196 |  |
|  | 0.79984  | 0.88913  | 0.436066 |  |
|  | 0.880593 | 0.803086 | 0.273414 |  |
|  | 0.492612 | 0.824643 | 0.653985 |  |
|  | 0.25432  | 0.464216 | 0.753417 |  |
|  | 0.451821 | 0.959525 | 0.659313 |  |
|  | 0.491956 | 0.757372 | 0.762107 |  |
|  | 0.137172 | 0.543191 | 0.618674 |  |
|  | 0.251071 | 0.475382 | 0.640554 |  |
|  | 0.268922 | 0.886243 | 0.64848  |  |
|  | 0.318713 | 0.640731 | 0.794386 |  |
|  | 0.130645 | 0.553784 | 0.48876  |  |
|  | 0.207502 | 0.704256 | 0.709612 |  |
|  | 0.310688 | 0.77724  | 0.554379 |  |

|                                    |          |          |          |  |
|------------------------------------|----------|----------|----------|--|
| S <sub>8</sub> -Rh@VS <sub>2</sub> |          |          |          |  |
|                                    | 1        |          |          |  |
|                                    | 12.884   | 0        | 0        |  |
|                                    | -6.442   | 11.15787 | 0        |  |
|                                    | 0        | 0        | 17.8775  |  |
|                                    | V        | S        | Rh       |  |
|                                    | 16       | 40       | 1        |  |
| Direct                             |          |          |          |  |
|                                    | 0.211754 | 0.209388 | 0.370968 |  |
|                                    | 0.464702 | 0.220427 | 0.373102 |  |
|                                    | 0.693738 | 0.205328 | 0.371874 |  |
|                                    | 0.937308 | 0.193834 | 0.362639 |  |
|                                    | 0.194041 | 0.444155 | 0.380761 |  |
|                                    | 0.440662 | 0.453211 | 0.370714 |  |
|                                    | 0.689192 | 0.459132 | 0.370107 |  |
|                                    | 0.981392 | 0.475694 | 0.385167 |  |
|                                    | 0.196583 | 0.727879 | 0.376468 |  |
|                                    | 0.498629 | 0.732557 | 0.370291 |  |
|                                    | 0.733372 | 0.737227 | 0.370443 |  |
|                                    | 0.944669 | 0.703092 | 0.365273 |  |
|                                    | 0.229466 | 0.984316 | 0.371362 |  |
|                                    | 0.450546 | 0.961251 | 0.369617 |  |
|                                    | 0.703529 | 0.971204 | 0.364864 |  |
|                                    | 0.985216 | 0.96768  | 0.369792 |  |
|                                    | 0.039296 | 0.129426 | 0.448014 |  |
|                                    | 0.137987 | 0.051886 | 0.284752 |  |
|                                    | 0.295852 | 0.13573  | 0.456405 |  |
|                                    | 0.382952 | 0.053225 | 0.287501 |  |
|                                    | 0.541064 | 0.131581 | 0.454753 |  |
|                                    | 0.622791 | 0.048611 | 0.284835 |  |
|                                    | 0.786591 | 0.126042 | 0.451198 |  |
|                                    | 0.87483  | 0.045312 | 0.284124 |  |
|                                    | 0.030584 | 0.360537 | 0.463    |  |
|                                    | 0.12314  | 0.29679  | 0.291917 |  |
|                                    | 0.289272 | 0.375353 | 0.457803 |  |
|                                    | 0.376901 | 0.298105 | 0.289293 |  |
|                                    | 0.53918  | 0.38167  | 0.455791 |  |
|                                    | 0.625263 | 0.297868 | 0.288879 |  |
|                                    | 0.792069 | 0.380427 | 0.44719  |  |
|                                    | 0.879137 | 0.307685 | 0.298402 |  |
|                                    | 0.032638 | 0.648273 | 0.460773 |  |
|                                    | 0.128605 | 0.55029  | 0.300408 |  |
|                                    | 0.304176 | 0.638499 | 0.432816 |  |

|  |          |          |          |  |
|--|----------|----------|----------|--|
|  | 0.373574 | 0.548425 | 0.297525 |  |
|  | 0.553348 | 0.63549  | 0.448686 |  |
|  | 0.624058 | 0.548831 | 0.292083 |  |
|  | 0.789165 | 0.631592 | 0.450949 |  |
|  | 0.876868 | 0.542446 | 0.294396 |  |
|  | 0.050324 | 0.888207 | 0.451069 |  |
|  | 0.128575 | 0.802128 | 0.289907 |  |
|  | 0.294459 | 0.887747 | 0.457098 |  |
|  | 0.375448 | 0.795818 | 0.297178 |  |
|  | 0.549124 | 0.885812 | 0.45139  |  |
|  | 0.638994 | 0.80377  | 0.28163  |  |
|  | 0.802831 | 0.890189 | 0.448105 |  |
|  | 0.885006 | 0.80396  | 0.284186 |  |
|  | 0.329544 | 0.384012 | 0.682221 |  |
|  | 0.266648 | 0.719222 | 0.680579 |  |
|  | 0.083988 | 0.411922 | 0.687644 |  |
|  | 0.163651 | 0.331005 | 0.634574 |  |
|  | 0.459848 | 0.522794 | 0.620125 |  |
|  | 0.50735  | 0.683763 | 0.671208 |  |
|  | 0.417403 | 0.761562 | 0.621529 |  |
|  | 0.120816 | 0.569689 | 0.628329 |  |
|  | 0.132478 | 0.555233 | 0.499042 |  |

|                                      |          |          |          |    |
|--------------------------------------|----------|----------|----------|----|
| Li <sub>2</sub> S-Ta@VS <sub>2</sub> |          |          |          |    |
|                                      | 1        |          |          |    |
|                                      | 12.884   | 0        | 0        |    |
|                                      | -6.442   | 11.15787 | 0        |    |
|                                      | 0        | 0        | 17.8775  |    |
|                                      | V        | S        | Ta       | Li |
|                                      | 16       | 33       | 1        | 2  |
| Direct                               |          |          |          |    |
|                                      | 0.216513 | 0.209753 | 0.364968 |    |
|                                      | 0.476496 | 0.216865 | 0.364617 |    |
|                                      | 0.716545 | 0.241919 | 0.366265 |    |
|                                      | 0.940979 | 0.220733 | 0.365218 |    |
|                                      | 0.211339 | 0.438428 | 0.356216 |    |
|                                      | 0.449266 | 0.439557 | 0.359157 |    |
|                                      | 0.711967 | 0.482455 | 0.365503 |    |
|                                      | 0.953932 | 0.46815  | 0.364899 |    |
|                                      | 0.191391 | 0.729526 | 0.364701 |    |
|                                      | 0.480535 | 0.761722 | 0.355807 |    |
|                                      | 0.744645 | 0.732736 | 0.359408 |    |
|                                      | 0.959779 | 0.707004 | 0.363424 |    |
|                                      | 0.193721 | 0.972204 | 0.368015 |    |
|                                      | 0.490829 | 0.997032 | 0.366222 |    |
|                                      | 0.722409 | 0.969238 | 0.366622 |    |
|                                      | 0.967439 | 0.99315  | 0.364959 |    |
|                                      | 0.046184 | 0.144296 | 0.445256 |    |
|                                      | 0.126615 | 0.051742 | 0.279323 |    |
|                                      | 0.295959 | 0.132584 | 0.447719 |    |
|                                      | 0.383329 | 0.05452  | 0.288009 |    |
|                                      | 0.555483 | 0.148736 | 0.452992 |    |
|                                      | 0.640664 | 0.066741 | 0.285568 |    |
|                                      | 0.797153 | 0.144791 | 0.448742 |    |
|                                      | 0.880256 | 0.061301 | 0.280192 |    |
|                                      | 0.0497   | 0.390081 | 0.441999 |    |
|                                      | 0.1256   | 0.292121 | 0.278653 |    |
|                                      | 0.294531 | 0.375365 | 0.447205 |    |
|                                      | 0.378138 | 0.291212 | 0.2787   |    |
|                                      | 0.545762 | 0.387581 | 0.44794  |    |
|                                      | 0.631267 | 0.311406 | 0.282142 |    |
|                                      | 0.798905 | 0.396596 | 0.450398 |    |
|                                      | 0.876335 | 0.310468 | 0.28012  |    |
|                                      | 0.042779 | 0.638294 | 0.449599 |    |
|                                      | 0.136552 | 0.555184 | 0.29288  |    |
|                                      | 0.295596 | 0.638343 | 0.433895 |    |

|  |          |          |          |  |
|--|----------|----------|----------|--|
|  | 0.387607 | 0.562274 | 0.296963 |  |
|  | 0.555146 | 0.64146  | 0.450233 |  |
|  | 0.626666 | 0.560179 | 0.286997 |  |
|  | 0.80088  | 0.641669 | 0.448854 |  |
|  | 0.87667  | 0.553868 | 0.280584 |  |
|  | 0.040815 | 0.888466 | 0.444887 |  |
|  | 0.123817 | 0.806003 | 0.279488 |  |
|  | 0.297151 | 0.890998 | 0.439621 |  |
|  | 0.383552 | 0.820427 | 0.283958 |  |
|  | 0.560026 | 0.903586 | 0.452316 |  |
|  | 0.640465 | 0.810313 | 0.282301 |  |
|  | 0.804776 | 0.890626 | 0.446887 |  |
|  | 0.889713 | 0.809673 | 0.280127 |  |
|  | 0.383082 | 0.592207 | 0.618277 |  |
|  | 0.452901 | 0.711308 | 0.51499  |  |
|  | 0.210905 | 0.473065 | 0.532079 |  |
|  | 0.461357 | 0.477155 | 0.538684 |  |

|                                                    |          |          |          |    |
|----------------------------------------------------|----------|----------|----------|----|
| Li <sub>2</sub> S <sub>2</sub> -Ta@VS <sub>2</sub> |          |          |          |    |
|                                                    | 1        |          |          |    |
|                                                    | 12.884   | 0        | 0        |    |
|                                                    | -6.442   | 11.15787 | 0        |    |
|                                                    | 0        | 0        | 17.8775  |    |
|                                                    | V        | S        | Ta       | Li |
|                                                    | 16       | 34       | 1        | 2  |
| Direct                                             |          |          |          |    |
|                                                    | 0.188315 | 0.199648 | 0.361917 |    |
|                                                    | 0.474539 | 0.222553 | 0.359329 |    |
|                                                    | 0.713796 | 0.215819 | 0.361917 |    |
|                                                    | 0.956449 | 0.229667 | 0.359311 |    |
|                                                    | 0.198995 | 0.436025 | 0.360975 |    |
|                                                    | 0.455217 | 0.436712 | 0.356492 |    |
|                                                    | 0.702798 | 0.456794 | 0.360321 |    |
|                                                    | 0.954107 | 0.472429 | 0.361068 |    |
|                                                    | 0.19418  | 0.732454 | 0.360255 |    |
|                                                    | 0.466049 | 0.683053 | 0.346626 |    |
|                                                    | 0.727625 | 0.726521 | 0.362291 |    |
|                                                    | 0.942674 | 0.698887 | 0.362098 |    |
|                                                    | 0.21517  | 0.984166 | 0.362364 |    |
|                                                    | 0.444804 | 0.980625 | 0.363804 |    |
|                                                    | 0.744445 | 0.988081 | 0.360885 |    |
|                                                    | 0.967628 | 0.952547 | 0.361757 |    |
|                                                    | 0.037113 | 0.126596 | 0.441211 |    |
|                                                    | 0.123646 | 0.045736 | 0.27502  |    |
|                                                    | 0.292611 | 0.137268 | 0.442153 |    |
|                                                    | 0.37644  | 0.052227 | 0.276147 |    |
|                                                    | 0.544655 | 0.135036 | 0.445983 |    |
|                                                    | 0.624657 | 0.043248 | 0.289871 |    |
|                                                    | 0.800921 | 0.13947  | 0.446037 |    |
|                                                    | 0.885162 | 0.055016 | 0.277683 |    |
|                                                    | 0.042952 | 0.383507 | 0.443313 |    |
|                                                    | 0.118956 | 0.290861 | 0.274261 |    |
|                                                    | 0.290252 | 0.372179 | 0.441543 |    |
|                                                    | 0.374173 | 0.286726 | 0.276158 |    |
|                                                    | 0.542828 | 0.375945 | 0.445446 |    |
|                                                    | 0.629892 | 0.296663 | 0.276486 |    |
|                                                    | 0.793297 | 0.382325 | 0.443681 |    |
|                                                    | 0.875612 | 0.303639 | 0.277209 |    |
|                                                    | 0.040806 | 0.633505 | 0.445173 |    |
|                                                    | 0.13124  | 0.553055 | 0.290283 |    |
|                                                    | 0.295496 | 0.623181 | 0.430858 |    |

|  |          |          |          |  |
|--|----------|----------|----------|--|
|  | 0.370809 | 0.528608 | 0.272497 |  |
|  | 0.541202 | 0.618436 | 0.436729 |  |
|  | 0.625965 | 0.546509 | 0.283273 |  |
|  | 0.789826 | 0.628255 | 0.445416 |  |
|  | 0.871561 | 0.546147 | 0.276875 |  |
|  | 0.045119 | 0.879722 | 0.442626 |  |
|  | 0.120972 | 0.801892 | 0.278659 |  |
|  | 0.287557 | 0.888554 | 0.445226 |  |
|  | 0.378965 | 0.796271 | 0.298305 |  |
|  | 0.553126 | 0.893201 | 0.445296 |  |
|  | 0.63542  | 0.807507 | 0.28369  |  |
|  | 0.799976 | 0.885147 | 0.444045 |  |
|  | 0.877503 | 0.794851 | 0.27632  |  |
|  | 0.5682   | 0.699141 | 0.611935 |  |
|  | 0.342639 | 0.761913 | 0.60357  |  |
|  | 0.456306 | 0.726134 | 0.517727 |  |
|  | 0.371729 | 0.611867 | 0.662143 |  |
|  | 0.545047 | 0.862852 | 0.651382 |  |

|                                                    |          |          |          |    |
|----------------------------------------------------|----------|----------|----------|----|
| Li <sub>2</sub> S <sub>4</sub> -Ta@VS <sub>2</sub> |          |          |          |    |
|                                                    | 1        |          |          |    |
|                                                    | 12.884   | 0        | 0        |    |
|                                                    | -6.442   | 11.15787 | 0        |    |
|                                                    | 0        | 0        | 17.8775  |    |
|                                                    | V        | S        | Ta       | Li |
|                                                    | 16       | 36       | 1        | 2  |
| Direct                                             |          |          |          |    |
|                                                    | 0.187216 | 0.202606 | 0.364072 |    |
|                                                    | 0.475713 | 0.213315 | 0.364507 |    |
|                                                    | 0.730014 | 0.23359  | 0.36416  |    |
|                                                    | 0.954014 | 0.22446  | 0.362196 |    |
|                                                    | 0.193862 | 0.436195 | 0.363315 |    |
|                                                    | 0.43591  | 0.430871 | 0.360476 |    |
|                                                    | 0.700245 | 0.458663 | 0.363039 |    |
|                                                    | 0.966833 | 0.476746 | 0.36342  |    |
|                                                    | 0.187112 | 0.726223 | 0.35998  |    |
|                                                    | 0.485912 | 0.750969 | 0.352898 |    |
|                                                    | 0.735917 | 0.730032 | 0.364713 |    |
|                                                    | 0.944008 | 0.699542 | 0.361787 |    |
|                                                    | 0.216073 | 0.984529 | 0.364815 |    |
|                                                    | 0.433115 | 0.957804 | 0.362377 |    |
|                                                    | 0.735199 | 0.990274 | 0.361277 |    |
|                                                    | 0.970634 | 0.959913 | 0.365243 |    |
|                                                    | 0.035697 | 0.127566 | 0.445423 |    |
|                                                    | 0.12489  | 0.047493 | 0.277629 |    |
|                                                    | 0.292871 | 0.136465 | 0.444313 |    |
|                                                    | 0.375231 | 0.050638 | 0.278623 |    |
|                                                    | 0.545264 | 0.13114  | 0.444452 |    |
|                                                    | 0.624921 | 0.051681 | 0.293451 |    |
|                                                    | 0.798887 | 0.141442 | 0.44842  |    |
|                                                    | 0.883908 | 0.056964 | 0.280297 |    |
|                                                    | 0.043016 | 0.384841 | 0.447072 |    |
|                                                    | 0.120647 | 0.293776 | 0.276795 |    |
|                                                    | 0.283859 | 0.369872 | 0.44682  |    |
|                                                    | 0.369499 | 0.287514 | 0.279929 |    |
|                                                    | 0.538565 | 0.378186 | 0.445694 |    |
|                                                    | 0.629794 | 0.298367 | 0.279999 |    |
|                                                    | 0.795483 | 0.38827  | 0.446658 |    |
|                                                    | 0.881242 | 0.307584 | 0.27856  |    |
|                                                    | 0.03842  | 0.635926 | 0.447916 |    |
|                                                    | 0.132586 | 0.553765 | 0.287603 |    |
|                                                    | 0.294058 | 0.640331 | 0.43536  |    |

|  |          |          |          |  |
|--|----------|----------|----------|--|
|  | 0.377782 | 0.552153 | 0.297279 |  |
|  | 0.54693  | 0.635585 | 0.433059 |  |
|  | 0.620447 | 0.549986 | 0.290465 |  |
|  | 0.791096 | 0.630676 | 0.447119 |  |
|  | 0.872323 | 0.546226 | 0.279987 |  |
|  | 0.044664 | 0.881959 | 0.444831 |  |
|  | 0.117955 | 0.801523 | 0.278947 |  |
|  | 0.284271 | 0.884054 | 0.447757 |  |
|  | 0.367537 | 0.798278 | 0.280685 |  |
|  | 0.546467 | 0.892417 | 0.441096 |  |
|  | 0.641709 | 0.812105 | 0.277926 |  |
|  | 0.797323 | 0.887376 | 0.444594 |  |
|  | 0.881189 | 0.799364 | 0.277718 |  |
|  | 0.555932 | 0.862124 | 0.713533 |  |
|  | 0.56179  | 0.881628 | 0.596937 |  |
|  | 0.302161 | 0.586112 | 0.620268 |  |
|  | 0.444528 | 0.551309 | 0.606027 |  |
|  | 0.45259  | 0.701247 | 0.51988  |  |
|  | 0.47505  | 0.65926  | 0.716644 |  |
|  | 0.372173 | 0.801887 | 0.655659 |  |

|                                                    |          |          |          |    |
|----------------------------------------------------|----------|----------|----------|----|
| Li <sub>2</sub> S <sub>6</sub> -Ta@VS <sub>2</sub> |          |          |          |    |
|                                                    | 1        |          |          |    |
|                                                    | 12.884   | 0        | 0        |    |
|                                                    | -6.442   | 11.15787 | 0        |    |
|                                                    | 0        | 0        | 17.8775  |    |
|                                                    | V        | S        | Ta       | Li |
|                                                    | 16       | 38       | 1        | 2  |
| Direct                                             |          |          |          |    |
|                                                    | 0.210539 | 0.202895 | 0.363869 |    |
|                                                    | 0.47066  | 0.23341  | 0.36253  |    |
|                                                    | 0.698062 | 0.215736 | 0.362631 |    |
|                                                    | 0.933816 | 0.214395 | 0.360651 |    |
|                                                    | 0.179136 | 0.430747 | 0.35587  |    |
|                                                    | 0.424746 | 0.445804 | 0.36025  |    |
|                                                    | 0.721957 | 0.462473 | 0.36261  |    |
|                                                    | 0.963966 | 0.465546 | 0.362722 |    |
|                                                    | 0.186634 | 0.729199 | 0.358728 |    |
|                                                    | 0.485525 | 0.712221 | 0.349675 |    |
|                                                    | 0.724779 | 0.702626 | 0.358302 |    |
|                                                    | 0.944017 | 0.700463 | 0.359453 |    |
|                                                    | 0.187828 | 0.960756 | 0.362207 |    |
|                                                    | 0.425779 | 0.975337 | 0.360246 |    |
|                                                    | 0.723378 | 0.983777 | 0.36116  |    |
|                                                    | 0.96924  | 0.978599 | 0.364307 |    |
|                                                    | 0.037104 | 0.133659 | 0.4428   |    |
|                                                    | 0.118473 | 0.048309 | 0.276272 |    |
|                                                    | 0.287814 | 0.128939 | 0.443702 |    |
|                                                    | 0.362396 | 0.052683 | 0.27735  |    |
|                                                    | 0.531387 | 0.130474 | 0.443955 |    |
|                                                    | 0.610426 | 0.041811 | 0.287932 |    |
|                                                    | 0.78429  | 0.132368 | 0.447679 |    |
|                                                    | 0.873058 | 0.053025 | 0.277361 |    |
|                                                    | 0.033601 | 0.375126 | 0.445703 |    |
|                                                    | 0.109041 | 0.28492  | 0.278209 |    |
|                                                    | 0.276234 | 0.372533 | 0.44514  |    |
|                                                    | 0.368145 | 0.293277 | 0.277197 |    |
|                                                    | 0.538774 | 0.382551 | 0.442698 |    |
|                                                    | 0.62411  | 0.300995 | 0.277774 |    |
|                                                    | 0.789743 | 0.378098 | 0.446513 |    |
|                                                    | 0.866382 | 0.29898  | 0.279064 |    |
|                                                    | 0.036983 | 0.631911 | 0.444551 |    |
|                                                    | 0.128272 | 0.551645 | 0.286404 |    |
|                                                    | 0.277136 | 0.627206 | 0.478806 |    |

|  |          |          |          |  |
|--|----------|----------|----------|--|
|  | 0.359404 | 0.542497 | 0.281647 |  |
|  | 0.540056 | 0.617529 | 0.439387 |  |
|  | 0.617272 | 0.539784 | 0.287908 |  |
|  | 0.79293  | 0.625324 | 0.446807 |  |
|  | 0.874857 | 0.543919 | 0.277174 |  |
|  | 0.031045 | 0.879279 | 0.442996 |  |
|  | 0.113936 | 0.799804 | 0.275044 |  |
|  | 0.275608 | 0.881638 | 0.445894 |  |
|  | 0.369578 | 0.793569 | 0.296598 |  |
|  | 0.532297 | 0.880775 | 0.428739 |  |
|  | 0.639352 | 0.800861 | 0.277257 |  |
|  | 0.784071 | 0.875384 | 0.436636 |  |
|  | 0.87653  | 0.796987 | 0.278154 |  |
|  | 0.698574 | -0.02737 | 0.635338 |  |
|  | 0.520401 | 0.847967 | 0.629936 |  |
|  | 0.757827 | 0.675309 | 0.671227 |  |
|  | 0.487041 | 0.672158 | 0.640153 |  |
|  | 0.972063 | 0.954427 | 0.636296 |  |
|  | 0.900167 | 0.779281 | 0.609079 |  |
|  | 0.466855 | 0.719579 | 0.513289 |  |
|  | 0.779735 | 0.867433 | 0.69952  |  |
|  | 0.862092 | 0.008251 | 0.539879 |  |

|                                                    |          |          |          |    |
|----------------------------------------------------|----------|----------|----------|----|
| Li <sub>2</sub> S <sub>8</sub> -Ta@VS <sub>2</sub> |          |          |          |    |
|                                                    | 1        |          |          |    |
|                                                    | 12.884   | 0        | 0        |    |
|                                                    | -6.442   | 11.15787 | 0        |    |
|                                                    | 0        | 0        | 17.8775  |    |
|                                                    | V        | S        | Ta       | Li |
|                                                    | 16       | 40       | 1        | 2  |
| Direct                                             |          |          |          |    |
|                                                    | 0.215314 | 0.203728 | 0.358868 |    |
|                                                    | 0.481386 | 0.233607 | 0.354673 |    |
|                                                    | 0.711194 | 0.220679 | 0.356805 |    |
|                                                    | 0.948137 | 0.222424 | 0.355741 |    |
|                                                    | 0.186466 | 0.435367 | 0.355981 |    |
|                                                    | 0.433652 | 0.44292  | 0.356276 |    |
|                                                    | 0.729947 | 0.469426 | 0.356457 |    |
|                                                    | 0.964605 | 0.463083 | 0.357116 |    |
|                                                    | 0.19452  | 0.731761 | 0.356775 |    |
|                                                    | 0.466698 | 0.707911 | 0.366087 |    |
|                                                    | 0.739516 | 0.724785 | 0.352891 |    |
|                                                    | 0.956346 | 0.701959 | 0.354252 |    |
|                                                    | 0.190163 | 0.960036 | 0.357273 |    |
|                                                    | 0.444876 | 0.985179 | 0.35288  |    |
|                                                    | 0.741659 | 0.986255 | 0.358571 |    |
|                                                    | 0.974187 | 0.986756 | 0.358907 |    |
|                                                    | 0.046873 | 0.137754 | 0.438956 |    |
|                                                    | 0.125866 | 0.050803 | 0.27069  |    |
|                                                    | 0.296255 | 0.13023  | 0.436488 |    |
|                                                    | 0.373245 | 0.057152 | 0.272193 |    |
|                                                    | 0.543251 | 0.137725 | 0.438337 |    |
|                                                    | 0.623848 | 0.044899 | 0.284558 |    |
|                                                    | 0.795382 | 0.137994 | 0.442383 |    |
|                                                    | 0.882877 | 0.057069 | 0.27163  |    |
|                                                    | 0.036336 | 0.376917 | 0.44288  |    |
|                                                    | 0.120247 | 0.292478 | 0.274028 |    |
|                                                    | 0.284567 | 0.372129 | 0.441601 |    |
|                                                    | 0.3756   | 0.296176 | 0.272182 |    |
|                                                    | 0.547292 | 0.385905 | 0.435936 |    |
|                                                    | 0.635397 | 0.306654 | 0.27154  |    |
|                                                    | 0.796343 | 0.38376  | 0.440706 |    |
|                                                    | 0.875792 | 0.302024 | 0.272106 |    |
|                                                    | 0.042385 | 0.6338   | 0.440537 |    |
|                                                    | 0.134866 | 0.553631 | 0.283292 |    |
|                                                    | 0.279777 | 0.626747 | 0.452676 |    |

|  |          |          |          |  |
|--|----------|----------|----------|--|
|  | 0.369244 | 0.54805  | 0.2843   |  |
|  | 0.547706 | 0.618839 | 0.448517 |  |
|  | 0.623869 | 0.550746 | 0.288465 |  |
|  | 0.802907 | 0.635331 | 0.439426 |  |
|  | 0.882679 | 0.547913 | 0.270562 |  |
|  | 0.038326 | 0.882923 | 0.437781 |  |
|  | 0.123133 | 0.801672 | 0.269815 |  |
|  | 0.288391 | 0.889249 | 0.438909 |  |
|  | 0.379067 | 0.799419 | 0.292356 |  |
|  | 0.550457 | 0.899007 | 0.445166 |  |
|  | 0.62989  | 0.801606 | 0.288591 |  |
|  | 0.801239 | 0.886407 | 0.438211 |  |
|  | 0.885591 | 0.803563 | 0.272932 |  |
|  | 0.42447  | 0.341886 | 0.60454  |  |
|  | 0.468661 | 0.681764 | 0.714184 |  |
|  | 0.538622 | 0.281717 | 0.635275 |  |
|  | 0.34682  | 0.372253 | 0.699242 |  |
|  | 0.723294 | 0.715528 | 0.627013 |  |
|  | 0.590698 | 0.755051 | 0.620426 |  |
|  | 0.711038 | 0.424748 | 0.636067 |  |
|  | 0.46873  | 0.532192 | 0.750975 |  |
|  | 0.464522 | 0.722463 | 0.506815 |  |
|  | 0.665506 | 0.548919 | 0.708336 |  |
|  | 0.661846 | 0.533529 | 0.54237  |  |

|                                    |          |          |          |
|------------------------------------|----------|----------|----------|
| S <sub>8</sub> -Ta@VS <sub>2</sub> |          |          |          |
|                                    | 1        |          |          |
|                                    | 12.884   | 0        | 0        |
|                                    | -6.442   | 11.15787 | 0        |
|                                    | 0        | 0        | 17.8775  |
|                                    | V        | S        | Ta       |
|                                    | 16       | 40       | 1        |
| Direct                             |          |          |          |
|                                    | 0.197114 | 0.200421 | 0.360977 |
|                                    | 0.481083 | 0.220468 | 0.358078 |
|                                    | 0.718093 | 0.218037 | 0.358593 |
|                                    | 0.954395 | 0.221733 | 0.356805 |
|                                    | 0.186185 | 0.429002 | 0.359169 |
|                                    | 0.443594 | 0.432364 | 0.353788 |
|                                    | 0.712864 | 0.457919 | 0.35951  |
|                                    | 0.955396 | 0.457933 | 0.35939  |
|                                    | 0.190325 | 0.722268 | 0.360571 |
|                                    | 0.435817 | 0.730983 | 0.355259 |
|                                    | 0.742894 | 0.737028 | 0.352962 |
|                                    | 0.952509 | 0.693041 | 0.358055 |
|                                    | 0.207473 | 0.975919 | 0.362421 |
|                                    | 0.450242 | 0.981994 | 0.359914 |
|                                    | 0.748147 | 0.990748 | 0.357722 |
|                                    | 0.977307 | 0.975304 | 0.360959 |
|                                    | 0.043307 | 0.131508 | 0.442986 |
|                                    | 0.128862 | 0.048399 | 0.273044 |
|                                    | 0.295859 | 0.134649 | 0.440072 |
|                                    | 0.377025 | 0.056018 | 0.275097 |
|                                    | 0.547641 | 0.137546 | 0.443954 |
|                                    | 0.628212 | 0.045039 | 0.284969 |
|                                    | 0.799266 | 0.137318 | 0.444437 |
|                                    | 0.888504 | 0.055319 | 0.272248 |
|                                    | 0.037213 | 0.376052 | 0.444619 |
|                                    | 0.121358 | 0.289101 | 0.272665 |
|                                    | 0.290427 | 0.373924 | 0.440916 |
|                                    | 0.373625 | 0.287396 | 0.274713 |
|                                    | 0.542636 | 0.38088  | 0.440796 |
|                                    | 0.632372 | 0.29859  | 0.273905 |
|                                    | 0.79257  | 0.380923 | 0.443225 |
|                                    | 0.876591 | 0.299613 | 0.273328 |
|                                    | 0.0347   | 0.627698 | 0.444817 |
|                                    | 0.129158 | 0.546999 | 0.286185 |
|                                    | 0.2772   | 0.62236  | 0.435223 |

|  |          |          |          |
|--|----------|----------|----------|
|  | 0.376684 | 0.548859 | 0.293082 |
|  | 0.545252 | 0.630101 | 0.470932 |
|  | 0.623287 | 0.55237  | 0.289847 |
|  | 0.791126 | 0.632441 | 0.439129 |
|  | 0.874687 | 0.541887 | 0.274165 |
|  | 0.043345 | 0.880096 | 0.439401 |
|  | 0.118462 | 0.797712 | 0.276471 |
|  | 0.290846 | 0.884755 | 0.442721 |
|  | 0.362608 | 0.809072 | 0.277543 |
|  | 0.552715 | 0.895389 | 0.429398 |
|  | 0.624033 | 0.797842 | 0.293647 |
|  | 0.803144 | 0.886675 | 0.440671 |
|  | 0.888578 | 0.802827 | 0.273985 |
|  | 0.327026 | 0.614893 | 0.623526 |
|  | 0.360983 | 0.483076 | 0.681121 |
|  | 0.408829 | 0.784371 | 0.674107 |
|  | 0.495109 | 0.469208 | 0.634678 |
|  | 0.572795 | 0.874359 | 0.615377 |
|  | 0.654454 | 0.580937 | 0.690248 |
|  | 0.719573 | 0.864469 | 0.667713 |
|  | 0.74237  | 0.73332  | 0.624016 |
|  | 0.455189 | 0.725481 | 0.509009 |

|                                     |          |          |          |    |
|-------------------------------------|----------|----------|----------|----|
| Li <sub>2</sub> S-Y@VS <sub>2</sub> |          |          |          |    |
|                                     | 1        |          |          |    |
|                                     | 12.884   | 0        | 0        |    |
|                                     | -6.442   | 11.15787 | 0        |    |
|                                     | 0        | 0        | 17.8775  |    |
|                                     | V        | S        | Y        | Li |
|                                     | 16       | 33       | 1        | 2  |
| Direct                              |          |          |          |    |
|                                     | 0.187718 | 0.196808 | 0.357623 |    |
|                                     | 0.474928 | 0.210453 | 0.358654 |    |
|                                     | 0.715933 | 0.214616 | 0.357816 |    |
|                                     | 0.947666 | 0.215991 | 0.356348 |    |
|                                     | 0.189009 | 0.432375 | 0.358206 |    |
|                                     | 0.434647 | 0.432359 | 0.35322  |    |
|                                     | 0.706889 | 0.452555 | 0.358819 |    |
|                                     | 0.959109 | 0.463543 | 0.358887 |    |
|                                     | 0.186322 | 0.720858 | 0.359186 |    |
|                                     | 0.484923 | 0.747046 | 0.355205 |    |
|                                     | 0.733679 | 0.722696 | 0.362702 |    |
|                                     | 0.943435 | 0.691543 | 0.357729 |    |
|                                     | 0.217166 | 0.978839 | 0.360128 |    |
|                                     | 0.44246  | 0.964766 | 0.360021 |    |
|                                     | 0.731443 | 0.982143 | 0.356675 |    |
|                                     | 0.972052 | 0.95477  | 0.36106  |    |
|                                     | 0.035371 | 0.121805 | 0.439162 |    |
|                                     | 0.124094 | 0.039956 | 0.272742 |    |
|                                     | 0.292904 | 0.132455 | 0.43872  |    |
|                                     | 0.376199 | 0.047995 | 0.274055 |    |
|                                     | 0.544164 | 0.12956  | 0.442316 |    |
|                                     | 0.624142 | 0.044413 | 0.283057 |    |
|                                     | 0.795661 | 0.13383  | 0.443418 |    |
|                                     | 0.881217 | 0.04906  | 0.275469 |    |
|                                     | 0.035398 | 0.374062 | 0.442952 |    |
|                                     | 0.117124 | 0.288191 | 0.271826 |    |
|                                     | 0.28113  | 0.362172 | 0.440211 |    |
|                                     | 0.369245 | 0.285256 | 0.274278 |    |
|                                     | 0.539582 | 0.374695 | 0.4391   |    |
|                                     | 0.628239 | 0.293989 | 0.274164 |    |
|                                     | 0.791025 | 0.377224 | 0.44149  |    |
|                                     | 0.874413 | 0.297604 | 0.273378 |    |
|                                     | 0.034682 | 0.625231 | 0.443471 |    |
|                                     | 0.128662 | 0.547108 | 0.284288 |    |
|                                     | 0.288308 | 0.628503 | 0.431356 |    |

|  |          |          |          |  |
|--|----------|----------|----------|--|
|  | 0.376423 | 0.550062 | 0.291833 |  |
|  | 0.544465 | 0.629657 | 0.433662 |  |
|  | 0.620486 | 0.544651 | 0.288036 |  |
|  | 0.791512 | 0.623693 | 0.443488 |  |
|  | 0.87171  | 0.539413 | 0.274476 |  |
|  | 0.045722 | 0.875622 | 0.4396   |  |
|  | 0.117983 | 0.794746 | 0.275665 |  |
|  | 0.286562 | 0.879872 | 0.443192 |  |
|  | 0.369287 | 0.796145 | 0.28251  |  |
|  | 0.552824 | 0.897203 | 0.440048 |  |
|  | 0.636844 | 0.803094 | 0.276896 |  |
|  | 0.798394 | 0.882392 | 0.440958 |  |
|  | 0.878107 | 0.791735 | 0.275059 |  |
|  | 0.365969 | 0.52717  | 0.615325 |  |
|  | 0.451104 | 0.705914 | 0.534214 |  |
|  | 0.203826 | 0.452638 | 0.531055 |  |
|  | 0.451994 | 0.451059 | 0.53072  |  |

|                                                   |          |          |          |    |
|---------------------------------------------------|----------|----------|----------|----|
| Li <sub>2</sub> S <sub>2</sub> -Y@VS <sub>2</sub> |          |          |          |    |
|                                                   | 1        |          |          |    |
|                                                   | 12.884   | 0        | 0        |    |
|                                                   | -6.442   | 11.15787 | 0        |    |
|                                                   | 0        | 0        | 17.8775  |    |
|                                                   | V        | S        | Y        | Li |
|                                                   | 16       | 34       | 1        | 2  |
| Direct                                            |          |          |          |    |
|                                                   | 0.190674 | 0.187443 | 0.364494 |    |
|                                                   | 0.447792 | 0.196976 | 0.36269  |    |
|                                                   | 0.700787 | 0.210206 | 0.361021 |    |
|                                                   | 0.941305 | 0.197775 | 0.361809 |    |
|                                                   | 0.180453 | 0.433586 | 0.364993 |    |
|                                                   | 0.438087 | 0.428941 | 0.366299 |    |
|                                                   | 0.696184 | 0.448613 | 0.36482  |    |
|                                                   | 0.941642 | 0.44776  | 0.364362 |    |
|                                                   | 0.179606 | 0.700644 | 0.365693 |    |
|                                                   | 0.46207  | 0.735181 | 0.348046 |    |
|                                                   | 0.719613 | 0.70463  | 0.36322  |    |
|                                                   | 0.947531 | 0.699898 | 0.365816 |    |
|                                                   | 0.193449 | 0.949792 | 0.36551  |    |
|                                                   | 0.456241 | 0.970354 | 0.356944 |    |
|                                                   | 0.706067 | 0.969255 | 0.3568   |    |
|                                                   | 0.953583 | 0.953575 | 0.365124 |    |
|                                                   | 0.02895  | 0.118217 | 0.445108 |    |
|                                                   | 0.115428 | 0.03627  | 0.279424 |    |
|                                                   | 0.282461 | 0.118023 | 0.445155 |    |
|                                                   | 0.363335 | 0.042039 | 0.27822  |    |
|                                                   | 0.534851 | 0.124612 | 0.444318 |    |
|                                                   | 0.620357 | 0.048575 | 0.276493 |    |
|                                                   | 0.783694 | 0.125079 | 0.443529 |    |
|                                                   | 0.871785 | 0.041684 | 0.278282 |    |
|                                                   | 0.028246 | 0.368142 | 0.447436 |    |
|                                                   | 0.115897 | 0.286055 | 0.281397 |    |
|                                                   | 0.271841 | 0.354204 | 0.447401 |    |
|                                                   | 0.362191 | 0.285008 | 0.281013 |    |
|                                                   | 0.532994 | 0.368744 | 0.448077 |    |
|                                                   | 0.615679 | 0.292017 | 0.281247 |    |
|                                                   | 0.783036 | 0.372138 | 0.447412 |    |
|                                                   | 0.867476 | 0.29184  | 0.280656 |    |
|                                                   | 0.029424 | 0.620184 | 0.448787 |    |
|                                                   | 0.117793 | 0.538362 | 0.285847 |    |
|                                                   | 0.28587  | 0.626702 | 0.437655 |    |

|  |          |          |          |  |
|--|----------|----------|----------|--|
|  | 0.367798 | 0.540318 | 0.293681 |  |
|  | 0.536032 | 0.628339 | 0.431492 |  |
|  | 0.614078 | 0.53764  | 0.286911 |  |
|  | 0.785317 | 0.621886 | 0.448242 |  |
|  | 0.866702 | 0.538712 | 0.284166 |  |
|  | 0.033502 | 0.87284  | 0.446751 |  |
|  | 0.11235  | 0.787795 | 0.281426 |  |
|  | 0.28568  | 0.875694 | 0.441568 |  |
|  | 0.361414 | 0.795267 | 0.277425 |  |
|  | 0.53963  | 0.881806 | 0.43699  |  |
|  | 0.625502 | 0.794172 | 0.278002 |  |
|  | 0.783758 | 0.875831 | 0.44077  |  |
|  | 0.872149 | 0.788704 | 0.280371 |  |
|  | 0.53907  | 0.614065 | 0.641444 |  |
|  | 0.47398  | 0.733637 | 0.62419  |  |
|  | 0.380048 | 0.540465 | 0.535716 |  |
|  | 0.653258 | 0.755342 | 0.544616 |  |
|  | 0.379872 | 0.798465 | 0.524949 |  |

|                                                   |          |          |          |    |
|---------------------------------------------------|----------|----------|----------|----|
| Li <sub>2</sub> S <sub>4</sub> -Y@VS <sub>2</sub> |          |          |          |    |
|                                                   | 1        |          |          |    |
|                                                   | 12.884   | 0        | 0        |    |
|                                                   | -6.442   | 11.15787 | 0        |    |
|                                                   | 0        | 0        | 17.8775  |    |
|                                                   | V        | S        | Y        | Li |
|                                                   | 16       | 36       | 1        | 2  |
| Direct                                            |          |          |          |    |
|                                                   | 0.182986 | 0.183753 | 0.357927 |    |
|                                                   | 0.484117 | 0.224254 | 0.355296 |    |
|                                                   | 0.719759 | 0.221667 | 0.358449 |    |
|                                                   | 0.949921 | 0.215847 | 0.358551 |    |
|                                                   | 0.181242 | 0.463444 | 0.352543 |    |
|                                                   | 0.481645 | 0.463033 | 0.348566 |    |
|                                                   | 0.725128 | 0.469061 | 0.356708 |    |
|                                                   | 0.947349 | 0.459763 | 0.357824 |    |
|                                                   | 0.187642 | 0.725395 | 0.361364 |    |
|                                                   | 0.479407 | 0.750885 | 0.351592 |    |
|                                                   | 0.735793 | 0.738028 | 0.360434 |    |
|                                                   | 0.95281  | 0.714035 | 0.357193 |    |
|                                                   | 0.187022 | 0.952882 | 0.358237 |    |
|                                                   | 0.479065 | 0.989343 | 0.356519 |    |
|                                                   | 0.723325 | 0.982884 | 0.358717 |    |
|                                                   | 0.953927 | 0.966006 | 0.358253 |    |
|                                                   | 0.036456 | 0.129241 | 0.443374 |    |
|                                                   | 0.117038 | 0.041723 | 0.270797 |    |
|                                                   | 0.293814 | 0.12936  | 0.431885 |    |
|                                                   | 0.378254 | 0.05434  | 0.280357 |    |
|                                                   | 0.551203 | 0.141456 | 0.442832 |    |
|                                                   | 0.635003 | 0.058087 | 0.274955 |    |
|                                                   | 0.795402 | 0.138332 | 0.444534 |    |
|                                                   | 0.879672 | 0.056521 | 0.27476  |    |
|                                                   | 0.039199 | 0.385749 | 0.441922 |    |
|                                                   | 0.126777 | 0.299    | 0.279604 |    |
|                                                   | 0.288037 | 0.373928 | 0.42769  |    |
|                                                   | 0.372997 | 0.295481 | 0.281889 |    |
|                                                   | 0.551304 | 0.388277 | 0.437317 |    |
|                                                   | 0.636176 | 0.304307 | 0.272974 |    |
|                                                   | 0.794296 | 0.385148 | 0.443967 |    |
|                                                   | 0.878399 | 0.302146 | 0.273579 |    |
|                                                   | 0.034423 | 0.633592 | 0.441483 |    |
|                                                   | 0.120906 | 0.555806 | 0.274548 |    |
|                                                   | 0.288144 | 0.64436  | 0.431352 |    |

|  |          |          |          |  |
|--|----------|----------|----------|--|
|  | 0.378663 | 0.556023 | 0.293296 |  |
|  | 0.553897 | 0.641986 | 0.431818 |  |
|  | 0.63864  | 0.558433 | 0.274729 |  |
|  | 0.7939   | 0.6342   | 0.440094 |  |
|  | 0.879804 | 0.551903 | 0.272327 |  |
|  | 0.036054 | 0.88091  | 0.44099  |  |
|  | 0.118745 | 0.800341 | 0.271847 |  |
|  | 0.291151 | 0.889585 | 0.435386 |  |
|  | 0.375105 | 0.809154 | 0.280996 |  |
|  | 0.548802 | 0.894217 | 0.440623 |  |
|  | 0.637184 | 0.810009 | 0.276298 |  |
|  | 0.795754 | 0.890073 | 0.443299 |  |
|  | 0.880074 | 0.805141 | 0.272405 |  |
|  | 0.398658 | 0.245334 | 0.612707 |  |
|  | 0.496336 | 0.391566 | 0.678853 |  |
|  | 0.267424 | 0.446722 | 0.649322 |  |
|  | 0.44954  | 0.530181 | 0.660469 |  |
|  | 0.367963 | 0.544268 | 0.520524 |  |
|  | 0.587496 | 0.359485 | 0.562156 |  |
|  | 0.241171 | 0.228024 | 0.530649 |  |

|                                                   |          |          |          |    |
|---------------------------------------------------|----------|----------|----------|----|
| Li <sub>2</sub> S <sub>6</sub> -Y@VS <sub>2</sub> |          |          |          |    |
|                                                   | 1        |          |          |    |
|                                                   | 12.884   | 0        | 0        |    |
|                                                   | -6.442   | 11.15787 | 0        |    |
|                                                   | 0        | 0        | 17.8775  |    |
|                                                   | V        | S        | Y        | Li |
|                                                   | 16       | 38       | 1        | 2  |
| Direct                                            |          |          |          |    |
|                                                   | 0.18592  | 0.179394 | 0.364975 |    |
|                                                   | 0.476869 | 0.211603 | 0.355167 |    |
|                                                   | 0.704364 | 0.189384 | 0.360911 |    |
|                                                   | 0.951674 | 0.211423 | 0.361508 |    |
|                                                   | 0.192454 | 0.47553  | 0.360742 |    |
|                                                   | 0.456507 | 0.432312 | 0.352881 |    |
|                                                   | 0.711006 | 0.470237 | 0.359847 |    |
|                                                   | 0.932619 | 0.437049 | 0.36185  |    |
|                                                   | 0.207325 | 0.720762 | 0.362763 |    |
|                                                   | 0.439052 | 0.72308  | 0.36067  |    |
|                                                   | 0.733349 | 0.730914 | 0.354866 |    |
|                                                   | 0.957204 | 0.690313 | 0.362153 |    |
|                                                   | 0.182628 | 0.936214 | 0.363345 |    |
|                                                   | 0.460571 | 0.970436 | 0.356008 |    |
|                                                   | 0.708434 | 0.952871 | 0.357938 |    |
|                                                   | 0.951985 | 0.969155 | 0.359159 |    |
|                                                   | 0.031424 | 0.119285 | 0.446393 |    |
|                                                   | 0.115322 | 0.035517 | 0.27712  |    |
|                                                   | 0.286825 | 0.118049 | 0.438633 |    |
|                                                   | 0.368467 | 0.041054 | 0.280374 |    |
|                                                   | 0.541235 | 0.1211   | 0.442134 |    |
|                                                   | 0.620509 | 0.03545  | 0.275631 |    |
|                                                   | 0.78665  | 0.118143 | 0.444095 |    |
|                                                   | 0.870598 | 0.043    | 0.276487 |    |
|                                                   | 0.031921 | 0.372013 | 0.444147 |    |
|                                                   | 0.123644 | 0.293106 | 0.288702 |    |
|                                                   | 0.280913 | 0.366017 | 0.434648 |    |
|                                                   | 0.36754  | 0.278102 | 0.276253 |    |
|                                                   | 0.538151 | 0.371077 | 0.441157 |    |
|                                                   | 0.628937 | 0.290235 | 0.27756  |    |
|                                                   | 0.77983  | 0.366928 | 0.441694 |    |
|                                                   | 0.867308 | 0.283984 | 0.276892 |    |
|                                                   | 0.033857 | 0.617446 | 0.443101 |    |
|                                                   | 0.112923 | 0.542686 | 0.28012  |    |
|                                                   | 0.280609 | 0.632857 | 0.448688 |    |

|  |          |          |          |  |
|--|----------|----------|----------|--|
|  | 0.364449 | 0.536375 | 0.291659 |  |
|  | 0.542684 | 0.62954  | 0.419656 |  |
|  | 0.622981 | 0.544123 | 0.279376 |  |
|  | 0.789997 | 0.62887  | 0.442704 |  |
|  | 0.868598 | 0.53547  | 0.276687 |  |
|  | 0.029286 | 0.867575 | 0.441096 |  |
|  | 0.115304 | 0.786434 | 0.276326 |  |
|  | 0.285883 | 0.8792   | 0.442742 |  |
|  | 0.365192 | 0.795172 | 0.274719 |  |
|  | 0.537244 | 0.876813 | 0.441238 |  |
|  | 0.615984 | 0.786886 | 0.281327 |  |
|  | 0.789819 | 0.876881 | 0.4436   |  |
|  | 0.879427 | 0.796326 | 0.274852 |  |
|  | 0.66023  | 0.292451 | 0.611952 |  |
|  | 0.50573  | 0.163474 | 0.659816 |  |
|  | 0.339376 | 0.291838 | 0.652237 |  |
|  | 0.420375 | 0.229172 | 0.726668 |  |
|  | 0.578418 | 0.576112 | 0.609423 |  |
|  | 0.422453 | 0.477064 | 0.670162 |  |
|  | 0.395275 | 0.540948 | 0.524054 |  |
|  | 0.468448 | 0.206269 | 0.534064 |  |
|  | 0.675351 | 0.466311 | 0.547091 |  |

|                                                   |          |          |          |    |
|---------------------------------------------------|----------|----------|----------|----|
| Li <sub>2</sub> S <sub>8</sub> -Y@VS <sub>2</sub> |          |          |          |    |
|                                                   | 1        |          |          |    |
|                                                   | 12.884   | 0        | 0        |    |
|                                                   | -6.442   | 11.15787 | 0        |    |
|                                                   | 0        | 0        | 17.8775  |    |
|                                                   | V        | S        | Y        | Li |
|                                                   | 16       | 40       | 1        | 2  |
| Direct                                            |          |          |          |    |
|                                                   | 0.178683 | 0.183604 | 0.356705 |    |
|                                                   | 0.44834  | 0.203698 | 0.355533 |    |
|                                                   | 0.696094 | 0.207172 | 0.354612 |    |
|                                                   | 0.935393 | 0.202227 | 0.354763 |    |
|                                                   | 0.166232 | 0.450319 | 0.347777 |    |
|                                                   | 0.463562 | 0.450043 | 0.348829 |    |
|                                                   | 0.695176 | 0.442952 | 0.351354 |    |
|                                                   | 0.928012 | 0.446547 | 0.35124  |    |
|                                                   | 0.187281 | 0.734748 | 0.357299 |    |
|                                                   | 0.453348 | 0.74269  | 0.348661 |    |
|                                                   | 0.730646 | 0.739246 | 0.356122 |    |
|                                                   | 0.96141  | 0.736995 | 0.354212 |    |
|                                                   | 0.205242 | 0.970479 | 0.352386 |    |
|                                                   | 0.458751 | 0.979822 | 0.353916 |    |
|                                                   | 0.699377 | 0.975347 | 0.354236 |    |
|                                                   | 0.946471 | 0.969393 | 0.352938 |    |
|                                                   | 0.025011 | 0.127633 | 0.438653 |    |
|                                                   | 0.111434 | 0.04384  | 0.268148 |    |
|                                                   | 0.281413 | 0.128576 | 0.437431 |    |
|                                                   | 0.367236 | 0.0491   | 0.269286 |    |
|                                                   | 0.532534 | 0.131135 | 0.440185 |    |
|                                                   | 0.614728 | 0.048192 | 0.269374 |    |
|                                                   | 0.778949 | 0.129981 | 0.440031 |    |
|                                                   | 0.86005  | 0.046831 | 0.270167 |    |
|                                                   | 0.022911 | 0.377671 | 0.436489 |    |
|                                                   | 0.110049 | 0.289757 | 0.27492  |    |
|                                                   | 0.272835 | 0.368388 | 0.427421 |    |
|                                                   | 0.359201 | 0.290369 | 0.276084 |    |
|                                                   | 0.533536 | 0.376623 | 0.438428 |    |
|                                                   | 0.611949 | 0.28973  | 0.270153 |    |
|                                                   | 0.778633 | 0.374189 | 0.438801 |    |
|                                                   | 0.859254 | 0.290693 | 0.270451 |    |
|                                                   | 0.025643 | 0.633861 | 0.431842 |    |
|                                                   | 0.108111 | 0.550881 | 0.274834 |    |
|                                                   | 0.27094  | 0.638901 | 0.429095 |    |

|  |          |          |          |  |
|--|----------|----------|----------|--|
|  | 0.363202 | 0.547491 | 0.291027 |  |
|  | 0.544871 | 0.638769 | 0.427495 |  |
|  | 0.622008 | 0.550024 | 0.275918 |  |
|  | 0.787929 | 0.634306 | 0.430249 |  |
|  | 0.862081 | 0.546311 | 0.275057 |  |
|  | 0.035138 | 0.888883 | 0.435389 |  |
|  | 0.115335 | 0.805785 | 0.267509 |  |
|  | 0.283144 | 0.890191 | 0.436932 |  |
|  | 0.361426 | 0.804138 | 0.271595 |  |
|  | 0.531336 | 0.886821 | 0.437885 |  |
|  | 0.61751  | 0.798306 | 0.276495 |  |
|  | 0.786846 | 0.889492 | 0.438225 |  |
|  | 0.871706 | 0.806155 | 0.267297 |  |
|  | 0.626765 | 0.428057 | 0.770285 |  |
|  | 0.440297 | 0.634485 | 0.796035 |  |
|  | 0.792087 | 0.485702 | 0.723763 |  |
|  | 0.635294 | 0.540681 | 0.858775 |  |
|  | 0.473098 | 0.533344 | 0.63335  |  |
|  | 0.366437 | 0.487494 | 0.728628 |  |
|  | 0.819019 | 0.598548 | 0.633801 |  |
|  | 0.620635 | 0.679095 | 0.81179  |  |
|  | 0.366262 | 0.54817  | 0.510887 |  |
|  | 0.669642 | 0.628141 | 0.6845   |  |
|  | 0.713863 | 0.479888 | 0.528396 |  |

|          |          |          |          |
|----------|----------|----------|----------|
| S8-Y@VS2 |          |          |          |
|          | 1        |          |          |
|          | 12.884   | 0        | 0        |
|          | -6.442   | 11.15787 | 0        |
|          | 0        | 0        | 17.8775  |
|          | V        | S        | Y        |
|          | 16       | 40       | 1        |
| Direct   |          |          |          |
|          | 0.197833 | 0.178408 | 0.359643 |
|          | 0.468086 | 0.208605 | 0.356976 |
|          | 0.704417 | 0.214773 | 0.357461 |
|          | 0.940332 | 0.21166  | 0.355076 |
|          | 0.17743  | 0.450738 | 0.350518 |
|          | 0.473951 | 0.447079 | 0.349488 |
|          | 0.710432 | 0.45069  | 0.356036 |
|          | 0.942653 | 0.458441 | 0.358158 |
|          | 0.197142 | 0.729484 | 0.362229 |
|          | 0.471273 | 0.743472 | 0.35104  |
|          | 0.74485  | 0.725052 | 0.35881  |
|          | 0.962033 | 0.709284 | 0.3566   |
|          | 0.216975 | 0.963538 | 0.357295 |
|          | 0.462818 | 0.977402 | 0.358559 |
|          | 0.708046 | 0.980515 | 0.355177 |
|          | 0.970353 | 0.953015 | 0.357274 |
|          | 0.037915 | 0.122728 | 0.434976 |
|          | 0.126897 | 0.037763 | 0.270509 |
|          | 0.295121 | 0.124204 | 0.441341 |
|          | 0.378725 | 0.048588 | 0.27284  |
|          | 0.544    | 0.131846 | 0.444076 |
|          | 0.623609 | 0.050882 | 0.273194 |
|          | 0.789153 | 0.13149  | 0.441688 |
|          | 0.874312 | 0.046434 | 0.277859 |
|          | 0.034009 | 0.376036 | 0.439657 |
|          | 0.121212 | 0.288348 | 0.279856 |
|          | 0.283591 | 0.364408 | 0.42703  |
|          | 0.372132 | 0.287911 | 0.276049 |
|          | 0.544989 | 0.376506 | 0.440157 |
|          | 0.625218 | 0.294102 | 0.271603 |
|          | 0.788647 | 0.377028 | 0.443407 |
|          | 0.870023 | 0.297008 | 0.273831 |
|          | 0.038123 | 0.627391 | 0.441239 |
|          | 0.119716 | 0.551148 | 0.277538 |
|          | 0.286487 | 0.63465  | 0.433629 |

|  |          |          |          |
|--|----------|----------|----------|
|  | 0.374227 | 0.546934 | 0.293478 |
|  | 0.559677 | 0.638305 | 0.426741 |
|  | 0.633163 | 0.549059 | 0.275835 |
|  | 0.798682 | 0.62734  | 0.439606 |
|  | 0.87286  | 0.543958 | 0.273273 |
|  | 0.046511 | 0.876638 | 0.439181 |
|  | 0.126244 | 0.799021 | 0.272738 |
|  | 0.295677 | 0.885212 | 0.442972 |
|  | 0.371057 | 0.801704 | 0.277541 |
|  | 0.545223 | 0.886511 | 0.440588 |
|  | 0.632622 | 0.800378 | 0.279515 |
|  | 0.799555 | 0.884298 | 0.434376 |
|  | 0.886004 | 0.797282 | 0.26987  |
|  | 0.170764 | 0.408712 | 0.619157 |
|  | 0.225784 | 0.292731 | 0.659109 |
|  | 0.225981 | 0.556176 | 0.689452 |
|  | 0.38423  | 0.336196 | 0.602763 |
|  | 0.38217  | 0.694354 | 0.643058 |
|  | 0.532793 | 0.446159 | 0.668421 |
|  | 0.534041 | 0.710062 | 0.694793 |
|  | 0.592243 | 0.61742  | 0.627675 |
|  | 0.383555 | 0.542094 | 0.511367 |
